# Supplementary material for: A graph representation of molecular ensembles for polymer property prediction
Source: Royal Society of Chemistry journal article supplement (doi:10.1039/d2sc02839e), 2022-01-01
Supplement: d2sc02839e2.csv [file d2sc02839e2.csv]

monoA	monoB	fracA	fracB	chain_arch	EA (eV)	IP (eV)	EA vs SHE (eV)	IP vs SHE (eV)
*c1cc(F)c(*)cc1F	*c1c(O)cc(O)c(*)c1O	0.5	0.5	alternating	1.878901833	6.261997174	-3.406210313	1.808017428
*c1cc(F)c(*)cc1F	*c1c(O)cc(O)c(*)c1O	0.5	0.5	block	2.329229219	6.210397443	-2.991909118	1.761061673
*c1cc(F)c(*)cc1F	*c1c(O)cc(O)c(*)c1O	0.5	0.5	random	2.106771614	6.272161149	-3.196570115	1.817266645
*c1cc(F)c(*)cc1F	*c1cc(C#N)c(*)cc1F	0.5	0.5	alternating	2.893603439	7.170896774	-2.472684837	2.635116064
*c1cc(F)c(*)cc1F	*c1cc(C#N)c(*)cc1F	0.5	0.5	block	2.896976243	7.142086292	-2.469581856	2.608898526
*c1cc(F)c(*)cc1F	*c1cc(C#N)c(*)cc1F	0.5	0.5	random	2.902965647	7.160923402	-2.464071605	2.626040296
*c1cc(F)c(*)cc1F	*c1cc(Cl)c(C)c(*)c1N	0.5	0.5	alternating	1.82088277	5.873999587	-3.459587852	1.454939624
*c1cc(F)c(*)cc1F	*c1cc(Cl)c(C)c(*)c1N	0.5	0.5	block	2.308256514	5.852000851	-3.011204007	1.434920774
*c1cc(F)c(*)cc1F	*c1cc(Cl)c(C)c(*)c1N	0.5	0.5	random	2.045682891	5.866900774	-3.252771741	1.448479705
*c1cc(F)c(*)cc1F	*c1ccc(OCC(=O)Cl)c(*)c1	0.5	0.5	alternating	2.492052244	6.545632672	-2.842111936	2.066125731
*c1cc(F)c(*)cc1F	*c1ccc(OCC(=O)Cl)c(*)c1	0.5	0.5	block	2.656351421	6.507350301	-2.690956693	2.031288774
*c1cc(F)c(*)cc1F	*c1ccc(OCC(=O)Cl)c(*)c1	0.5	0.5	random	2.551787033	6.496080422	-2.78715593	2.021033184
*c1cc(F)c(*)cc1F	*c1cc(*)c(C(=O)OC)nc1N	0.5	0.5	alternating	2.620096165	6.206529736	-2.724311528	1.75754206
*c1cc(F)c(*)cc1F	*c1cc(*)c(C(=O)OC)nc1N	0.5	0.5	block	2.659600049	6.210391667	-2.687967955	1.761056417
*c1cc(F)c(*)cc1F	*c1cc(*)c(C(=O)OC)nc1N	0.5	0.5	random	2.638105763	6.204970975	-2.707742698	1.756123587
*c1cc(F)c(*)cc1F	*c1nc(*)c2ccccc2n1	0.5	0.5	alternating	3.284249512	6.81807579	-2.113290449	2.314048969
*c1cc(F)c(*)cc1F	*c1nc(*)c2ccccc2n1	0.5	0.5	block	3.357974616	6.704045747	-2.045463353	2.21028163
*c1cc(F)c(*)cc1F	*c1nc(*)c2ccccc2n1	0.5	0.5	random	3.335307778	6.773855957	-2.066316844	2.273808921
*c1cc(F)c(*)cc1F	*c1cc(*)c(C=O)c(F)c1	0.5	0.5	alternating	3.363149241	7.096483871	-2.040702699	2.567400322
*c1cc(F)c(*)cc1F	*c1cc(*)c(C=O)c(F)c1	0.5	0.5	block	3.360273486	7.094953651	-2.043348393	2.566007822
*c1cc(F)c(*)cc1F	*c1cc(*)c(C=O)c(F)c1	0.5	0.5	random	3.352873915	7.093608715	-2.050155998	2.564783931
*c1cc(F)c(*)cc1F	*c1cc(Cl)c(*)cc1C	0.5	0.5	alternating	2.14971071	6.917888152	-3.157066147	2.404878218
*c1cc(F)c(*)cc1F	*c1cc(Cl)c(*)cc1C	0.5	0.5	block	2.372742009	6.919271552	-2.951877352	2.406137113
*c1cc(F)c(*)cc1F	*c1cc(Cl)c(*)cc1C	0.5	0.5	random	2.247535503	6.926400681	-3.067067337	2.41262462
*c1cc(F)c(*)cc1F	*c1ccc(*)c(C(=O)OC)n1	0.5	0.5	alternating	2.968651094	6.996153403	-2.403640994	2.476099597
*c1cc(F)c(*)cc1F	*c1ccc(*)c(C(=O)OC)n1	0.5	0.5	block	2.955798803	7.009613345	-2.415465101	2.488348144
*c1cc(F)c(*)cc1F	*c1ccc(*)c(C(=O)OC)n1	0.5	0.5	random	2.947352228	6.994517625	-2.42323595	2.474611038
*c1cc(F)c(*)cc1F	*c1ccc2c3ccc(*)cc3n(-c3ccccc3)c2c1	0.5	0.5	alternating	2.213825545	5.756618627	-3.098080499	1.348122951
*c1cc(F)c(*)cc1F	*c1ccc2c3ccc(*)cc3n(-c3ccccc3)c2c1	0.5	0.5	block	2.389546601	5.630627432	-2.936417127	1.233470964
*c1cc(F)c(*)cc1F	*c1ccc2c3ccc(*)cc3n(-c3ccccc3)c2c1	0.5	0.5	random	2.285360692	5.710956066	-3.032268163	1.30657002
*c1cc(F)c(*)cc1F	*c1cnc(*)c(C(=O)OCC)n1	0.5	0.5	alternating	3.492656867	6.942039556	-1.921555682	2.426855996
*c1cc(F)c(*)cc1F	*c1cnc(*)c(C(=O)OCC)n1	0.5	0.5	block	3.648850781	6.916876801	-1.777857281	2.403957889
*c1cc(F)c(*)cc1F	*c1cnc(*)c(C(=O)OCC)n1	0.5	0.5	random	3.487592579	6.934000336	-1.926214827	2.419540306
*c1cc(F)c(*)cc1F	*c1cc(C(F)(F)F)nc(*)c1N	0.5	0.5	alternating	2.46180326	6.159904834	-2.869941	1.715113399
*c1cc(F)c(*)cc1F	*c1cc(C(F)(F)F)nc(*)c1N	0.5	0.5	block	2.590784684	5.878629798	-2.751278091	1.459153116
*c1cc(F)c(*)cc1F	*c1cc(C(F)(F)F)nc(*)c1N	0.5	0.5	random	2.540173151	6.002879973	-2.797840701	1.572220776
*c1cc(F)c(*)cc1F	*c1cc(*)c2c(c1)C(C)(C)C(=O)N2	0.5	0.5	alternating	2.209434194	6.301785391	-3.102120542	1.844224706
*c1cc(F)c(*)cc1F	*c1cc(*)c2c(c1)C(C)(C)C(=O)N2	0.5	0.5	block	2.38561791	6.225431928	-2.940031523	1.774743054
*c1cc(F)c(*)cc1F	*c1cc(*)c2c(c1)C(C)(C)C(=O)N2	0.5	0.5	random	2.280999057	6.284781197	-3.036280867	1.828750889
*c1cc(F)c(*)cc1F	*c1cc(*)cc(NC(C)=O)c1	0.5	0.5	alternating	2.159668018	6.480160565	-3.147905424	2.006546114
*c1cc(F)c(*)cc1F	*c1cc(*)cc(NC(C)=O)c1	0.5	0.5	block	2.366173576	6.455628828	-2.95792031	1.984222233
*c1cc(F)c(*)cc1F	*c1cc(*)cc(NC(C)=O)c1	0.5	0.5	random	2.23995396	6.471769304	-3.074042357	1.998910066
*c1cc(F)c(*)cc1F	*c1ccc(*)c(NC(=O)c2ccccc2)c1	0.5	0.5	alternating	2.37193309	6.458323421	-2.952621558	1.986674313
*c1cc(F)c(*)cc1F	*c1ccc(*)c(NC(=O)c2ccccc2)c1	0.5	0.5	block	2.467357566	6.41632047	-2.86483104	1.948451627
*c1cc(F)c(*)cc1F	*c1ccc(*)c(NC(=O)c2ccccc2)c1	0.5	0.5	random	2.41173525	6.435648806	-2.91600357	1.966040414
*c1cc(F)c(*)cc1F	*c1ccc(*)c2sc(-c3ccccc3)nc12	0.5	0.5	alternating	2.884177657	6.354510265	-2.481356555	1.892204341
*c1cc(F)c(*)cc1F	*c1ccc(*)c2sc(-c3ccccc3)nc12	0.5	0.5	block	2.798006738	6.208558511	-2.560633801	1.759388245
*c1cc(F)c(*)cc1F	*c1ccc(*)c2sc(-c3ccccc3)nc12	0.5	0.5	random	2.847728936	6.31276653	-2.514889379	1.854217542
*c1cc(F)c(*)cc1F	*c1cc(*)cc(OC)c1	0.5	0.5	alternating	2.149818719	6.458651662	-3.156966778	1.986973013
*c1cc(F)c(*)cc1F	*c1cc(*)cc(OC)c1	0.5	0.5	block	2.375972337	6.433271242	-2.94890545	1.96387683
*c1cc(F)c(*)cc1F	*c1cc(*)cc(OC)c1	0.5	0.5	random	2.248500447	6.455915553	-3.066179588	1.984483153
*c1cc(F)c(*)cc1F	*c1cnc(CO)c(*)c1	0.5	0.5	alternating	2.376048816	6.803133522	-2.948835089	2.300451505
*c1cc(F)c(*)cc1F	*c1cnc(CO)c(*)c1	0.5	0.5	block	2.435473064	6.809767938	-2.894164781	2.306488823
*c1cc(F)c(*)cc1F	*c1cnc(CO)c(*)c1	0.5	0.5	random	2.419370321	6.79466719	-2.908979305	2.292747143
*c1cc(F)c(*)cc1F	*c1cc(*)cc(C(=O)Cl)c1	0.5	0.5	alternating	3.345974189	7.24679731	-2.056503746	2.704185552
*c1cc(F)c(*)cc1F	*c1cc(*)cc(C(=O)Cl)c1	0.5	0.5	block	3.350461909	7.205025883	-2.052375044	2.666173553
*c1cc(F)c(*)cc1F	*c1cc(*)cc(C(=O)Cl)c1	0.5	0.5	random	3.345566506	7.222463561	-2.056878814	2.682041841
*c1cc(F)c(*)cc1F	*c1nc(*)c(C)s1	0.5	0.5	alternating	2.848405034	6.193037986	-2.514267369	1.745264567
*c1cc(F)c(*)cc1F	*c1nc(*)c(C)s1	0.5	0.5	block	2.686289367	5.912879323	-2.663413782	1.490320184
*c1cc(F)c(*)cc1F	*c1nc(*)c(C)s1	0.5	0.5	random	2.827651746	6.101309346	-2.533360394	1.661791505
*c1cc(F)c(*)cc1F	*c1cc(*)c2ccc3cc(C(C)(C)C)cc4ccc1c2c43	0.5	0.5	alternating	2.861863791	5.856654523	-2.501885313	1.439155616
*c1cc(F)c(*)cc1F	*c1cc(*)c2ccc3cc(C(C)(C)C)cc4ccc1c2c43	0.5	0.5	block	2.783359771	5.773596699	-2.574109011	1.363572996
*c1cc(F)c(*)cc1F	*c1cc(*)c2ccc3cc(C(C)(C)C)cc4ccc1c2c43	0.5	0.5	random	2.824586679	5.819647283	-2.536180255	1.405479028
*c1cc(F)c(*)cc1F	*c1cc(*)c2cn[nH]c2c1	0.5	0.5	alternating	2.397244366	6.250510155	-2.929335183	1.797564241
*c1cc(F)c(*)cc1F	*c1cc(*)c2cn[nH]c2c1	0.5	0.5	block	2.450526198	6.154668651	-2.880315898	1.710348472
*c1cc(F)c(*)cc1F	*c1cc(*)c2cn[nH]c2c1	0.5	0.5	random	2.413707126	6.207227508	-2.914189444	1.758177032
*c1cc(F)c(*)cc1F	*c1ccc(C(=O)c2ccc(*)cc2)cc1	0.5	0.5	alternating	3.130414393	6.856312422	-2.254818759	2.348844304
*c1cc(F)c(*)cc1F	*c1ccc(C(=O)c2ccc(*)cc2)cc1	0.5	0.5	block	3.097484961	6.843911765	-2.285113836	2.337559706
*c1cc(F)c(*)cc1F	*c1ccc(C(=O)c2ccc(*)cc2)cc1	0.5	0.5	random	3.114411982	6.850092864	-2.269540976	2.343184506
*c1cc(F)c(*)cc1F	*c1ccc([N+](=O)[O-])c(*)c1	0.5	0.5	alternating	3.701546602	7.334588303	-1.729377126	2.784075356
*c1cc(F)c(*)cc1F	*c1ccc([N+](=O)[O-])c(*)c1	0.5	0.5	block	3.783504247	7.249461527	-1.653976092	2.70660999
*c1cc(F)c(*)cc1F	*c1ccc([N+](=O)[O-])c(*)c1	0.5	0.5	random	3.733622991	7.291806001	-1.699866848	2.745143461
*c1cc(F)c(*)cc1F	*c1cc(=O)cc(*)[nH]1	0.5	0.5	alternating	2.729466325	6.409643905	-2.623690981	1.942375953
*c1cc(F)c(*)cc1F	*c1cc(=O)cc(*)[nH]1	0.5	0.5	block	2.630648394	6.434535802	-2.714603478	1.96502758
*c1cc(F)c(*)cc1F	*c1cc(=O)cc(*)[nH]1	0.5	0.5	random	2.653468972	6.413426103	-2.693608546	1.945817753
*c1cc(F)c(*)cc1F	*c1cccc(*)c1[N+](=O)[O-]	0.5	0.5	alternating	3.542600982	7.346893094	-1.875607096	2.795272716
*c1cc(F)c(*)cc1F	*c1cccc(*)c1[N+](=O)[O-]	0.5	0.5	block	3.774091961	7.268218265	-1.662635396	2.723678621
*c1cc(F)c(*)cc1F	*c1cccc(*)c1[N+](=O)[O-]	0.5	0.5	random	3.641762954	7.298602076	-1.784378082	2.751327889
*c1cc(F)c(*)cc1F	*c1cccc(*)n1	0.5	0.5	alternating	2.542217559	6.725433726	-2.795959845	2.229744691
*c1cc(F)c(*)cc1F	*c1cccc(*)n1	0.5	0.5	block	2.495474608	6.675335186	-2.838963361	2.18415502
*c1cc(F)c(*)cc1F	*c1cccc(*)n1	0.5	0.5	random	2.491652202	6.719501514	-2.842479974	2.224346377
*c1cc(F)c(*)cc1F	*c1ccc(*)c(N=C=S)c1	0.5	0.5	alternating	2.609945819	6.551365823	-2.733649846	2.071342899
*c1cc(F)c(*)cc1F	*c1ccc(*)c(N=C=S)c1	0.5	0.5	block	2.637945624	6.552349266	-2.707890026	2.072237832
*c1cc(F)c(*)cc1F	*c1ccc(*)c(N=C=S)c1	0.5	0.5	random	2.61676454	6.553772775	-2.727376623	2.073533225
*c1cc(F)c(*)cc1F	*c1[nH]nc2c(*)cncc12	0.5	0.5	alternating	3.055067083	6.163475944	-2.324138283	1.718363109
*c1cc(F)c(*)cc1F	*c1[nH]nc2c(*)cncc12	0.5	0.5	block	3.010197427	5.997664214	-2.365418367	1.567474434
*c1cc(F)c(*)cc1F	*c1[nH]nc2c(*)cncc12	0.5	0.5	random	3.06805855	6.10900868	-2.312186134	1.668797899
*c1cc(F)c(*)cc1F	*c1cc(*)c([N+]([O-])=NC(C)(C)C)c([N+](=O)[O-])c1	0.5	0.5	alternating	3.851626308	7.508120208	-1.591303797	2.941989389
*c1cc(F)c(*)cc1F	*c1cc(*)c([N+]([O-])=NC(C)(C)C)c([N+](=O)[O-])c1	0.5	0.5	block	3.977844252	7.320312634	-1.475183288	2.771084497
*c1cc(F)c(*)cc1F	*c1cc(*)c([N+]([O-])=NC(C)(C)C)c([N+](=O)[O-])c1	0.5	0.5	random	3.896849354	7.422938909	-1.549698594	2.864474407
*c1cc(F)c(*)cc1F	*c1cc2[nH]cnc2c(*)c1N	0.5	0.5	alternating	1.684120617	5.404042666	-3.585409032	1.027278826
*c1cc(F)c(*)cc1F	*c1cc2[nH]cnc2c(*)c1N	0.5	0.5	block	2.227078093	5.185654703	-3.085888154	0.82854578
*c1cc(F)c(*)cc1F	*c1cc2[nH]cnc2c(*)c1N	0.5	0.5	random	1.916599935	5.335987543	-3.37152806	0.965348664
*c1cc(F)c(*)cc1F	*c1ccc(*)c([N+](=O)[O-])c1	0.5	0.5	alternating	3.582487686	7.185326937	-1.838911329	2.648247512
*c1cc(F)c(*)cc1F	*c1ccc(*)c([N+](=O)[O-])c1	0.5	0.5	block	3.66386217	7.17100963	-1.764046803	2.635218764
*c1cc(F)c(*)cc1F	*c1ccc(*)c([N+](=O)[O-])c1	0.5	0.5	random	3.611698272	7.181868869	-1.81203759	2.645100671
*c1cc(F)c(*)cc1F	*c1cc(*)c(N)c(OC(F)(F)F)c1	0.5	0.5	alternating	2.381721514	5.924062935	-2.943616207	1.500497271
*c1cc(F)c(*)cc1F	*c1cc(*)c(N)c(OC(F)(F)F)c1	0.5	0.5	block	2.581849649	5.820248626	-2.759498323	1.40602625
*c1cc(F)c(*)cc1F	*c1cc(*)c(N)c(OC(F)(F)F)c1	0.5	0.5	random	2.476284804	5.885289956	-2.85661798	1.46521386
*c1cc(F)c(*)cc1F	*c1cc(C)c(*)nn1	0.5	0.5	alternating	2.845733139	6.785785173	-2.516725512	2.284664508
*c1cc(F)c(*)cc1F	*c1cc(C)c(*)nn1	0.5	0.5	block	3.060562509	6.742716913	-2.319082492	2.245472391
*c1cc(F)c(*)cc1F	*c1cc(C)c(*)nn1	0.5	0.5	random	2.955737325	6.769154092	-2.415521661	2.269530224
*c1cc(F)c(*)cc1F	*c1cnc(*)c(C(=O)O)n1	0.5	0.5	alternating	3.599333073	6.994186752	-1.823413573	2.474309945
*c1cc(F)c(*)cc1F	*c1cnc(*)c(C(=O)O)n1	0.5	0.5	block	3.714212866	6.960421954	-1.717724164	2.443583979
*c1cc(F)c(*)cc1F	*c1cnc(*)c(C(=O)O)n1	0.5	0.5	random	3.618117194	6.980408584	-1.806132182	2.461771812
*c1cc(F)c(*)cc1F	*c1cc(*)c(Cl)c(C#N)c1N	0.5	0.5	alternating	2.42305433	6.151985789	-2.905590016	1.707907068
*c1cc(F)c(*)cc1F	*c1cc(*)c(Cl)c(C#N)c1N	0.5	0.5	block	2.50016677	6.168362999	-2.834646571	1.722810329
*c1cc(F)c(*)cc1F	*c1cc(*)c(Cl)c(C#N)c1N	0.5	0.5	random	2.446026904	6.137499405	-2.884455248	1.694724458
*c1cc(F)c(*)cc1F	*c1ccc(*)c(Cl)n1	0.5	0.5	alternating	2.907358625	6.895655044	-2.460030065	2.38464609
*c1cc(F)c(*)cc1F	*c1ccc(*)c(Cl)n1	0.5	0.5	block	2.905900908	6.900418701	-2.461371165	2.388981018
*c1cc(F)c(*)cc1F	*c1ccc(*)c(Cl)n1	0.5	0.5	random	2.936629493	6.886902559	-2.433100866	2.376681329
*c1cc(F)c(*)cc1F	*c1c(C)cc(N)c(*)c1C	0.5	0.5	alternating	1.473145555	5.727798499	-3.779506089	1.321896634
*c1cc(F)c(*)cc1F	*c1c(C)cc(N)c(*)c1C	0.5	0.5	block	2.244200576	5.630411534	-3.07013547	1.233274496
*c1cc(F)c(*)cc1F	*c1c(C)cc(N)c(*)c1C	0.5	0.5	random	1.824267067	5.707616707	-3.456474298	1.303531203
*c1cc(F)c(*)cc1F	*c1nc(*)n(C)c1C	0.5	0.5	alternating	1.813228205	5.848699412	-3.466630052	1.431916465
*c1cc(F)c(*)cc1F	*c1nc(*)n(C)c1C	0.5	0.5	block	2.292761409	5.265650651	-3.025459504	0.901342092
*c1cc(F)c(*)cc1F	*c1nc(*)n(C)c1C	0.5	0.5	random	2.072337956	5.589654057	-3.22824908	1.196185192
*c1cc(F)c(*)cc1F	*c1cc(*)c(F)cc1F	0.5	0.5	alternating	2.430080112	6.991047064	-2.899126297	2.471452828
*c1cc(F)c(*)cc1F	*c1cc(*)c(F)cc1F	0.5	0.5	block	2.476320105	6.991287189	-2.856585503	2.471671342
*c1cc(F)c(*)cc1F	*c1cc(*)c(F)cc1F	0.5	0.5	random	2.444799445	6.993120723	-2.885584511	2.473339858
*c1cc(F)c(*)cc1F	*c1cc(C(=O)OC)nc(*)c1N	0.5	0.5	alternating	2.491385365	6.205158693	-2.842725464	1.756294411
*c1cc(F)c(*)cc1F	*c1cc(C(=O)OC)nc(*)c1N	0.5	0.5	block	2.618851608	5.897894864	-2.725456521	1.476684327
*c1cc(F)c(*)cc1F	*c1cc(C(=O)OC)nc(*)c1N	0.5	0.5	random	2.543755159	6.095014023	-2.794545253	1.656062761
*c1cc(F)c(*)cc1F	*c1ccc(C(=O)O)c(*)n1	0.5	0.5	alternating	3.229352446	7.181535723	-2.16379575	2.644797508
*c1cc(F)c(*)cc1F	*c1ccc(C(=O)O)c(*)n1	0.5	0.5	block	3.112288671	7.093770827	-2.271494423	2.564931453
*c1cc(F)c(*)cc1F	*c1ccc(C(=O)O)c(*)n1	0.5	0.5	random	3.157760373	7.138145285	-2.229660457	2.605312209
*c1cc(F)c(*)cc1F	*c1cc(C)cc(*)c1[N+]#[C-]	0.5	0.5	alternating	2.251757272	6.921447533	-3.06318331	2.408117255
*c1cc(F)c(*)cc1F	*c1cc(C)cc(*)c1[N+]#[C-]	0.5	0.5	block	2.426413584	6.868584035	-2.902499503	2.360011471
*c1cc(F)c(*)cc1F	*c1cc(C)cc(*)c1[N+]#[C-]	0.5	0.5	random	2.333497436	6.889801191	-2.987982359	2.379319084
*c1cc(F)c(*)cc1F	*c1cc(C(=O)OCC)cc(*)c1N	0.5	0.5	alternating	2.049505259	6.070739858	-3.249255162	1.633973271
*c1cc(F)c(*)cc1F	*c1cc(C(=O)OCC)cc(*)c1N	0.5	0.5	block	2.387781925	6.057254916	-2.938040629	1.621701974
*c1cc(F)c(*)cc1F	*c1cc(C(=O)OCC)cc(*)c1N	0.5	0.5	random	2.199105033	6.073346734	-3.11162337	1.636345528
*c1cc(F)c(*)cc1F	*c1cc(*)c(OC)cc1N	0.5	0.5	alternating	1.620058408	5.511076032	-3.644346265	1.124679189
*c1cc(F)c(*)cc1F	*c1cc(*)c(OC)cc1N	0.5	0.5	block	2.281620698	5.299261878	-3.035708958	0.931928309
*c1cc(F)c(*)cc1F	*c1cc(*)c(OC)cc1N	0.5	0.5	random	1.934789253	5.411679547	-3.354793887	1.034228388
*c1cc(F)c(*)cc1F	*c1ccc(N)c(*)c1	0.5	0.5	alternating	1.648394637	5.54175227	-3.618276934	1.152594566
*c1cc(F)c(*)cc1F	*c1ccc(N)c(*)c1	0.5	0.5	block	2.243365226	5.307815906	-3.070903992	0.939712475
*c1cc(F)c(*)cc1F	*c1ccc(N)c(*)c1	0.5	0.5	random	1.912041205	5.459356754	-3.375722091	1.077614646
*c1cc(F)c(*)cc1F	*c1cc(*)c(C(=O)O)cn1	0.5	0.5	alternating	3.297458854	7.289144404	-2.101137854	2.742721407
*c1cc(F)c(*)cc1F	*c1cc(*)c(C(=O)O)cn1	0.5	0.5	block	3.331785199	7.15778138	-2.069557617	2.623181056
*c1cc(F)c(*)cc1F	*c1cc(*)c(C(=O)O)cn1	0.5	0.5	random	3.290002296	7.223313238	-2.107997888	2.682815047
*c1cc(F)c(*)cc1F	*c1cc(C=CC(=O)O)cc(*)c1OCC	0.5	0.5	alternating	2.720898998	6.460047311	-2.631572922	1.988243053
*c1cc(F)c(*)cc1F	*c1cc(C=CC(=O)O)cc(*)c1OCC	0.5	0.5	block	2.915892651	6.612229573	-2.452178761	2.126728912
*c1cc(F)c(*)cc1F	*c1cc(C=CC(=O)O)cc(*)c1OCC	0.5	0.5	random	2.803026758	6.541129392	-2.556015383	2.062027747
*c1cc(F)c(*)cc1F	*c1cc(*)c(F)cn1	0.5	0.5	alternating	2.842932219	7.092250702	-2.519302359	2.563548139
*c1cc(F)c(*)cc1F	*c1cc(*)c(F)cn1	0.5	0.5	block	2.817607888	7.03739766	-2.542600743	2.51363187
*c1cc(F)c(*)cc1F	*c1cc(*)c(F)cn1	0.5	0.5	random	2.839428814	7.069382172	-2.522525492	2.542737776
*c1cc(F)c(*)cc1F	*c1cc(Cl)c(*)c(Cl)c1C	0.5	0.5	alternating	2.198813468	7.196233493	-3.111891609	2.658172479
*c1cc(F)c(*)cc1F	*c1cc(Cl)c(*)c(Cl)c1C	0.5	0.5	block	2.462452324	7.123836633	-2.869343862	2.592291336
*c1cc(F)c(*)cc1F	*c1cc(Cl)c(*)c(Cl)c1C	0.5	0.5	random	2.274111732	7.191530088	-3.042617206	2.65389238
*c1cc(F)c(*)cc1F	*c1cccc2c1oc1c(*)cccc12	0.5	0.5	alternating	2.425179583	6.364842871	-2.903634783	1.901607013
*c1cc(F)c(*)cc1F	*c1cccc2c1oc1c(*)cccc12	0.5	0.5	block	2.42240113	6.302199445	-2.90619096	1.844601495
*c1cc(F)c(*)cc1F	*c1cccc2c1oc1c(*)cccc12	0.5	0.5	random	2.458891846	6.338658319	-2.872619502	1.877779071
*c1cc(F)c(*)cc1F	*c1cccc(*)c1CC	0.5	0.5	alternating	1.634346231	6.993416078	-3.631201467	2.473608631
*c1cc(F)c(*)cc1F	*c1cccc(*)c1CC	0.5	0.5	block	2.305691592	6.864419116	-3.013563735	2.356221396
*c1cc(F)c(*)cc1F	*c1cccc(*)c1CC	0.5	0.5	random	1.948007407	6.925125116	-3.342633185	2.411463855
*c1cc(F)c(*)cc1F	*c1cc(F)cc(*)c1OCC	0.5	0.5	alternating	2.249556863	6.664463598	-3.065207686	2.174261875
*c1cc(F)c(*)cc1F	*c1cc(F)cc(*)c1OCC	0.5	0.5	block	2.456956254	6.680359228	-2.874400246	2.188726897
*c1cc(F)c(*)cc1F	*c1cc(F)cc(*)c1OCC	0.5	0.5	random	2.369460001	6.682082375	-2.9548968	2.190294962
*c1cc(F)c(*)cc1F	*c1ccc(*)c2nccnc12	0.5	0.5	alternating	3.309400848	6.535301551	-2.09015122	2.056724411
*c1cc(F)c(*)cc1F	*c1ccc(*)c2nccnc12	0.5	0.5	block	3.229149491	6.400399707	-2.163982469	1.933963733
*c1cc(F)c(*)cc1F	*c1ccc(*)c2nccnc12	0.5	0.5	random	3.296238205	6.45818763	-2.102260851	1.986550743
*c1cc(F)c(*)cc1F	*c1nc(*)c(OCC)cc1N	0.5	0.5	alternating	1.870739447	5.609805017	-3.413719708	1.214522565
*c1cc(F)c(*)cc1F	*c1nc(*)c(OCC)cc1N	0.5	0.5	block	2.295763265	4.937166873	-3.022697796	0.602421855
*c1cc(F)c(*)cc1F	*c1nc(*)c(OCC)cc1N	0.5	0.5	random	2.027377106	5.238149535	-3.269613063	0.876316077
*c1cc(F)c(*)cc1F	*c1cc(*)cc(-c2ccccc2)c1	0.5	0.5	alternating	2.130765807	6.571463611	-3.174495458	2.089631886
*c1cc(F)c(*)cc1F	*c1cc(*)cc(-c2ccccc2)c1	0.5	0.5	block	2.397610161	6.516990894	-2.928998652	2.040061713
*c1cc(F)c(*)cc1F	*c1cc(*)cc(-c2ccccc2)c1	0.5	0.5	random	2.247144475	6.552580405	-3.067427083	2.072448169
*c1cc(F)c(*)cc1F	*c1cc(*)c(OC(C)C)c(C=O)c1	0.5	0.5	alternating	2.881937707	6.700048175	-2.48341731	2.206643839
*c1cc(F)c(*)cc1F	*c1cc(*)c(OC(C)C)c(C=O)c1	0.5	0.5	block	2.892561645	6.696247064	-2.473643286	2.203184828
*c1cc(F)c(*)cc1F	*c1cc(*)c(OC(C)C)c(C=O)c1	0.5	0.5	random	2.87570723	6.681932246	-2.489149349	2.190158344
*c1cc(F)c(*)cc1F	*c1ccc2c(c1)C1(CCOCC1)c1cc(*)ccc1-2	0.5	0.5	alternating	2.559687288	6.194298028	-2.779887695	1.746411205
*c1cc(F)c(*)cc1F	*c1ccc2c(c1)C1(CCOCC1)c1cc(*)ccc1-2	0.5	0.5	block	2.518597448	6.016060107	-2.817690348	1.584214697
*c1cc(F)c(*)cc1F	*c1ccc2c(c1)C1(CCOCC1)c1cc(*)ccc1-2	0.5	0.5	random	2.550515142	6.112154266	-2.788326069	1.671660382
*c1cc(F)c(*)cc1F	*c1cc(*)c(C)c(F)c1	0.5	0.5	alternating	2.23008487	6.882300377	-3.08312192	2.372493343
*c1cc(F)c(*)cc1F	*c1cc(*)c(C)c(F)c1	0.5	0.5	block	2.419176122	6.892472096	-2.909157967	2.381749607
*c1cc(F)c(*)cc1F	*c1cc(*)c(C)c(F)c1	0.5	0.5	random	2.33884217	6.864120591	-2.983065204	2.355949738
*c1cc(F)c(*)cc1F	*c1cc(*)c(Cl)c(Cl)c1	0.5	0.5	alternating	2.630862848	7.071808169	-2.71440618	2.544945433
*c1cc(F)c(*)cc1F	*c1cc(*)c(Cl)c(Cl)c1	0.5	0.5	block	2.672710649	7.069620847	-2.675906203	2.542954971
*c1cc(F)c(*)cc1F	*c1cc(*)c(Cl)c(Cl)c1	0.5	0.5	random	2.659544757	7.065801609	-2.688018824	2.539479464
*c1cc(F)c(*)cc1F	*c1ccc2c(c1)c1cc(*)ccc1n2CC1CO1	0.5	0.5	alternating	1.859093338	5.695817328	-3.424434129	1.292793768
*c1cc(F)c(*)cc1F	*c1ccc2c(c1)c1cc(*)ccc1n2CC1CO1	0.5	0.5	block	2.296184592	5.437277416	-3.022310176	1.057522448
*c1cc(F)c(*)cc1F	*c1ccc2c(c1)c1cc(*)ccc1n2CC1CO1	0.5	0.5	random	2.058523872	5.567388368	-3.240958038	1.175923415
*c1cc(F)c(*)cc1F	*c1cc2ccc3cc(*)cc4ccc(c1)c2c34	0.5	0.5	alternating	2.617798559	5.892915774	-2.726425326	1.472153354
*c1cc(F)c(*)cc1F	*c1cc2ccc3cc(*)cc4ccc(c1)c2c34	0.5	0.5	block	2.618957074	5.831522077	-2.725359492	1.41628509
*c1cc(F)c(*)cc1F	*c1cc2ccc3cc(*)cc4ccc(c1)c2c34	0.5	0.5	random	2.597763353	5.867285674	-2.744857715	1.448829963
*c1cc(F)c(*)cc1F	*c1cncc(*)c1OC	0.5	0.5	alternating	2.125969395	6.781199538	-3.178908156	2.280491579
*c1cc(F)c(*)cc1F	*c1cncc(*)c1OC	0.5	0.5	block	2.411371061	6.807927862	-2.916338623	2.304814354
*c1cc(F)c(*)cc1F	*c1cncc(*)c1OC	0.5	0.5	random	2.306484791	6.799878747	-3.012833992	2.29748966
*c1cc(F)c(*)cc1F	*c1cc(C)c(*)cc1C	0.5	0.5	alternating	1.736049965	6.731571673	-3.537634032	2.235330222
*c1cc(F)c(*)cc1F	*c1cc(C)c(*)cc1C	0.5	0.5	block	2.296704798	6.652685786	-3.021831585	2.163544065
*c1cc(F)c(*)cc1F	*c1cc(C)c(*)cc1C	0.5	0.5	random	1.977379503	6.706478083	-3.315610857	2.212495056
*c1cc(F)c(*)cc1F	*c1cc(C(C)=O)cc(*)c1N	0.5	0.5	alternating	2.246370394	6.049891451	-3.068139237	1.615001221
*c1cc(F)c(*)cc1F	*c1cc(C(C)=O)cc(*)c1N	0.5	0.5	block	2.443481281	6.001518299	-2.886797222	1.570981652
*c1cc(F)c(*)cc1F	*c1cc(C(C)=O)cc(*)c1N	0.5	0.5	random	2.31622328	6.045448716	-3.003874582	1.610958332
*c1cc(F)c(*)cc1F	*c1cc(C)cc(*)c1Cl	0.5	0.5	alternating	2.093797424	6.953753184	-3.20850637	2.437515398
*c1cc(F)c(*)cc1F	*c1cc(C)cc(*)c1Cl	0.5	0.5	block	2.433305154	6.929110111	-2.896159259	2.415090201
*c1cc(F)c(*)cc1F	*c1cc(C)cc(*)c1Cl	0.5	0.5	random	2.231323314	6.954183137	-3.081982551	2.437906655
*c1cc(F)c(*)cc1F	*c1cc([N+](=O)[O-])c(C)c(*)c1OC	0.5	0.5	alternating	3.463246492	7.127812901	-1.948613227	2.59590974
*c1cc(F)c(*)cc1F	*c1cc([N+](=O)[O-])c(C)c(*)c1OC	0.5	0.5	block	3.531211241	7.122209078	-1.886085658	2.590810261
*c1cc(F)c(*)cc1F	*c1cc([N+](=O)[O-])c(C)c(*)c1OC	0.5	0.5	random	3.498126348	7.127803633	-1.91652376	2.595901306
*c1cc(F)c(*)cc1F	*c1cnc(C(=O)OC)c(*)n1	0.5	0.5	alternating	3.47340013	6.987657908	-1.939271881	2.468368696
*c1cc(F)c(*)cc1F	*c1cnc(C(=O)OC)c(*)n1	0.5	0.5	block	3.527060288	6.954951346	-1.889904535	2.438605725
*c1cc(F)c(*)cc1F	*c1cnc(C(=O)OC)c(*)n1	0.5	0.5	random	3.497885649	6.97576777	-1.916745203	2.457548671
*c1cc(F)c(*)cc1F	*c1cc(*)c2nc(-c3ccccc3O)ccc2c1	0.5	0.5	alternating	2.927572469	6.134157951	-2.441433328	1.691683735
*c1cc(F)c(*)cc1F	*c1cc(*)c2nc(-c3ccccc3O)ccc2c1	0.5	0.5	block	2.851635633	6.073580024	-2.511295218	1.636557822
*c1cc(F)c(*)cc1F	*c1cc(*)c2nc(-c3ccccc3O)ccc2c1	0.5	0.5	random	2.904814617	6.095659182	-2.462370553	1.656649856
*c1cc(F)c(*)cc1F	*c1cc(CN)cc(*)c1OC	0.5	0.5	alternating	1.973061909	6.291370264	-3.319583044	1.83474694
*c1cc(F)c(*)cc1F	*c1cc(CN)cc(*)c1OC	0.5	0.5	block	2.332207957	6.266203032	-2.989168679	1.811844759
*c1cc(F)c(*)cc1F	*c1cc(CN)cc(*)c1OC	0.5	0.5	random	2.1366244	6.285502424	-3.169105552	1.829407206
*c1cc(F)c(*)cc1F	*c1cc(*)c(N)nc1C	0.5	0.5	alternating	1.852139956	5.850623092	-3.430831241	1.433667014
*c1cc(F)c(*)cc1F	*c1cc(*)c(N)nc1C	0.5	0.5	block	2.273042416	5.738358004	-3.043600977	1.331505784
*c1cc(F)c(*)cc1F	*c1cc(*)c(N)nc1C	0.5	0.5	random	2.046948033	5.807454931	-3.25160781	1.394383988
*c1cc(F)c(*)cc1F	*c1cc(*)c(N)c(C)c1	0.5	0.5	alternating	1.639972924	5.545915646	-3.62602491	1.156383238
*c1cc(F)c(*)cc1F	*c1cc(*)c(N)c(C)c1	0.5	0.5	block	2.239766961	5.342998073	-3.074214395	0.971728246
*c1cc(F)c(*)cc1F	*c1cc(*)c(N)c(C)c1	0.5	0.5	random	1.881142583	5.467911123	-3.404148823	1.085399122
*c1cc(F)c(*)cc1F	*c1cccc(*)c1	0.5	0.5	alternating	2.12054854	6.697469335	-3.183895343	2.204297095
*c1cc(F)c(*)cc1F	*c1cccc(*)c1	0.5	0.5	block	2.35805569	6.655469886	-2.965388766	2.166077597
*c1cc(F)c(*)cc1F	*c1cccc(*)c1	0.5	0.5	random	2.215001269	6.686180356	-3.096998832	2.194024124
*c1cc(F)c(*)cc1F	*c1ccc(OC(C)C(=O)Cl)c(*)c1	0.5	0.5	alternating	2.48098345	6.50415414	-2.852295226	2.028380268
*c1cc(F)c(*)cc1F	*c1ccc(OC(C)C(=O)Cl)c(*)c1	0.5	0.5	block	2.64239985	6.483162028	-2.703792138	2.009277446
*c1cc(F)c(*)cc1F	*c1ccc(OC(C)C(=O)Cl)c(*)c1	0.5	0.5	random	2.540894623	6.47446854	-2.797176947	2.001366371
*c1cc(F)c(*)cc1F	*c1cc2cc3sc(*)cc3cc2s1	0.5	0.5	alternating	3.100013434	5.647575781	-2.282787641	1.24889396
*c1cc(F)c(*)cc1F	*c1cc2cc3sc(*)cc3cc2s1	0.5	0.5	block	2.959479651	5.466967774	-2.412078721	1.084540675
*c1cc(F)c(*)cc1F	*c1cc2cc3sc(*)cc3cc2s1	0.5	0.5	random	3.028953375	5.572148877	-2.348162895	1.180255478
*c1cc(F)c(*)cc1F	*c1cnc(*)c(C=O)n1	0.5	0.5	alternating	3.626861504	6.821790605	-1.798087416	2.317429451
*c1cc(F)c(*)cc1F	*c1cnc(*)c(C=O)n1	0.5	0.5	block	3.580241403	6.84673285	-1.84097791	2.340126893
*c1cc(F)c(*)cc1F	*c1cnc(*)c(C=O)n1	0.5	0.5	random	3.611635603	6.830702861	-1.812095245	2.325539603
*c1cc(F)c(*)cc1F	*c1cc(C=O)cc(*)c1OC(C)=O	0.5	0.5	alternating	3.157248439	7.246633164	-2.230131437	2.704036179
*c1cc(F)c(*)cc1F	*c1cc(C=O)cc(*)c1OC(C)=O	0.5	0.5	block	3.197192338	7.170111449	-2.193383049	2.634401418
*c1cc(F)c(*)cc1F	*c1cc(C=O)cc(*)c1OC(C)=O	0.5	0.5	random	3.173920561	7.221337626	-2.214793084	2.68101724
*c1cc(F)c(*)cc1F	*c1ncc(*)c2[nH]ccc12	0.5	0.5	alternating	2.397770309	5.940053874	-2.928851315	1.515049025
*c1cc(F)c(*)cc1F	*c1ncc(*)c2[nH]ccc12	0.5	0.5	block	2.542896774	5.582689272	-2.795334968	1.189847237
*c1cc(F)c(*)cc1F	*c1ncc(*)c2[nH]ccc12	0.5	0.5	random	2.462419563	5.782602952	-2.869374002	1.371768687
*c1cc(F)c(*)cc1F	*c1cnc(*)c(C(=O)OC)c1	0.5	0.5	alternating	3.02159797	7.096251538	-2.354929867	2.5671889
*c1cc(F)c(*)cc1F	*c1cnc(*)c(C(=O)OC)c1	0.5	0.5	block	3.033341241	7.090173314	-2.344126058	2.561657716
*c1cc(F)c(*)cc1F	*c1cnc(*)c(C(=O)OC)c1	0.5	0.5	random	3.040646757	7.101714802	-2.337404984	2.57216047
*c1cc(F)c(*)cc1F	*c1nc(*)n(COC)n1	0.5	0.5	alternating	2.59098729	6.931285024	-2.751091693	2.417069372
*c1cc(F)c(*)cc1F	*c1nc(*)n(COC)n1	0.5	0.5	block	2.604007181	6.974075407	-2.739113393	2.45600862
*c1cc(F)c(*)cc1F	*c1nc(*)n(COC)n1	0.5	0.5	random	2.586525251	6.93557358	-2.755196769	2.420971958
*c1cc(F)c(*)cc1F	*c1cc(F)nc(*)c1O	0.5	0.5	alternating	2.779989956	6.797085023	-2.57720924	2.294947371
*c1cc(F)c(*)cc1F	*c1cc(F)nc(*)c1O	0.5	0.5	block	2.919842279	6.692094221	-2.448545104	2.199405741
*c1cc(F)c(*)cc1F	*c1cc(F)nc(*)c1O	0.5	0.5	random	2.873742622	6.752555335	-2.490956788	2.254425355
*c1cc(F)c(*)cc1F	*c1cc(*)cc(CC)c1	0.5	0.5	alternating	2.118783417	6.683827285	-3.185519257	2.19188283
*c1cc(F)c(*)cc1F	*c1cc(*)cc(CC)c1	0.5	0.5	block	2.347374529	6.631167146	-2.975215433	2.143962103
*c1cc(F)c(*)cc1F	*c1cc(*)cc(CC)c1	0.5	0.5	random	2.217034795	6.668090949	-3.095127988	2.177562764
*c1cc(F)c(*)cc1F	*c1c(OC)cc(*)c2ncccc12	0.5	0.5	alternating	2.746539559	6.295774079	-2.607983606	1.838754412
*c1cc(F)c(*)cc1F	*c1c(OC)cc(*)c2ncccc12	0.5	0.5	block	2.695263229	6.234312165	-2.655157829	1.78282407
*c1cc(F)c(*)cc1F	*c1c(OC)cc(*)c2ncccc12	0.5	0.5	random	2.738741451	6.238161133	-2.615157865	1.786326631
*c1cc(F)c(*)cc1F	*c1cc(F)c(C)c(*)c1N	0.5	0.5	alternating	1.781897152	5.869601272	-3.49545462	1.450937157
*c1cc(F)c(*)cc1F	*c1cc(F)c(C)c(*)c1N	0.5	0.5	block	2.29132275	5.874858598	-3.02678307	1.455721325
*c1cc(F)c(*)cc1F	*c1cc(F)c(C)c(*)c1N	0.5	0.5	random	2.01776574	5.876587453	-3.27845552	1.457294582
*c1cc(F)c(*)cc1F	*c1cc(*)c2ncnc(Cl)c2c1	0.5	0.5	alternating	3.395697951	6.8921905	-2.010757886	2.381493355
*c1cc(F)c(*)cc1F	*c1cc(*)c2ncnc(Cl)c2c1	0.5	0.5	block	3.384250384	6.882649918	-2.021289646	2.372811425
*c1cc(F)c(*)cc1F	*c1cc(*)c2ncnc(Cl)c2c1	0.5	0.5	random	3.388014002	6.889250098	-2.017827118	2.378817589
*c1cc(F)c(*)cc1F	*c1ccc2c(c1)C(=O)c1cc(*)ccc1-2	0.5	0.5	alternating	3.564278593	6.471816381	-1.855663694	1.998952907
*c1cc(F)c(*)cc1F	*c1ccc2c(c1)C(=O)c1cc(*)ccc1-2	0.5	0.5	block	3.520207747	6.402850363	-1.896208873	1.93619383
*c1cc(F)c(*)cc1F	*c1ccc2c(c1)C(=O)c1cc(*)ccc1-2	0.5	0.5	random	3.55400899	6.435399013	-1.865111729	1.965813102
*c1cc(F)c(*)cc1F	*c1cnc(CC)c(*)c1	0.5	0.5	alternating	2.245409862	6.802608931	-3.069022927	2.299974128
*c1cc(F)c(*)cc1F	*c1cnc(CC)c(*)c1	0.5	0.5	block	2.415756521	6.781554447	-2.912304001	2.280814547
*c1cc(F)c(*)cc1F	*c1cnc(CC)c(*)c1	0.5	0.5	random	2.325472733	6.794184379	-2.995365085	2.292307785
*c1cc(F)c(*)cc1F	*c1cc(C(C)(C)C)cc(*)c1N	0.5	0.5	alternating	1.740188718	5.719602043	-3.53382638	1.314437859
*c1cc(F)c(*)cc1F	*c1cc(C(C)(C)C)cc(*)c1N	0.5	0.5	block	2.25502746	5.574980809	-3.060174737	1.182832536
*c1cc(F)c(*)cc1F	*c1cc(C(C)(C)C)cc(*)c1N	0.5	0.5	random	1.977837086	5.663088178	-3.315189881	1.263010242
*c1cc(F)c(*)cc1F	*c1cc(*)cc(C(F)(F)F)c1	0.5	0.5	alternating	2.510618803	7.093538204	-2.825030702	2.564719766
*c1cc(F)c(*)cc1F	*c1cc(*)cc(C(F)(F)F)c1	0.5	0.5	block	2.569059876	7.070924872	-2.771264914	2.544141634
*c1cc(F)c(*)cc1F	*c1cc(*)cc(C(F)(F)F)c1	0.5	0.5	random	2.537086405	7.077290469	-2.800680507	2.549934327
*c1cc(F)c(*)cc1F	*c1cc(*)c(F)c(C=O)c1	0.5	0.5	alternating	3.109965083	7.140119438	-2.273632124	2.607108689
*c1cc(F)c(*)cc1F	*c1cc(*)c(F)c(C=O)c1	0.5	0.5	block	3.090134056	7.11661543	-2.291876668	2.585720042
*c1cc(F)c(*)cc1F	*c1cc(*)c(F)c(C=O)c1	0.5	0.5	random	3.106290678	7.133139026	-2.277012576	2.600756514
*c1cc(F)c(*)cc1F	*c1cc(C=O)cc(*)c1OC	0.5	0.5	alternating	2.812915052	6.85132682	-2.546918152	2.344307406
*c1cc(F)c(*)cc1F	*c1cc(C=O)cc(*)c1OC	0.5	0.5	block	2.860558159	6.855205094	-2.503086494	2.347836636
*c1cc(F)c(*)cc1F	*c1cc(C=O)cc(*)c1OC	0.5	0.5	random	2.829620511	6.836503343	-2.53154913	2.330818042
*c1cc(F)c(*)cc1F	*c1cc(C=CC(=O)O)cc(*)c1OCCC	0.5	0.5	alternating	2.961979843	6.632698722	-2.409778544	2.145355837
*c1cc(F)c(*)cc1F	*c1cc(C=CC(=O)O)cc(*)c1OCCC	0.5	0.5	block	2.805203397	6.467242547	-2.554012874	1.994790718
*c1cc(F)c(*)cc1F	*c1cc(C=CC(=O)O)cc(*)c1OCCC	0.5	0.5	random	2.811432812	6.548052672	-2.548281813	2.068327931
*c1cc(F)c(*)cc1F	*c1cc(O)cc(*)c1C	0.5	0.5	alternating	1.806851818	6.420166877	-3.472496328	1.951951858
*c1cc(F)c(*)cc1F	*c1cc(O)cc(*)c1C	0.5	0.5	block	2.316736805	6.414203032	-3.003402139	1.946524759
*c1cc(F)c(*)cc1F	*c1cc(O)cc(*)c1C	0.5	0.5	random	2.027505971	6.421217354	-3.269494507	1.952907792
*c1cc(F)c(*)cc1F	*c1cc(C)c(*)c([N+](=O)[O-])c1	0.5	0.5	alternating	3.579501038	7.246559439	-1.841659045	2.703969089
*c1cc(F)c(*)cc1F	*c1cc(C)c(*)c([N+](=O)[O-])c1	0.5	0.5	block	3.648092989	7.161868384	-1.77855445	2.62690023
*c1cc(F)c(*)cc1F	*c1cc(C)c(*)c([N+](=O)[O-])c1	0.5	0.5	random	3.604653216	7.194268202	-1.818519041	2.656384064
*c1cc(F)c(*)cc1F	*c1cc(N)cc(*)c1C	0.5	0.5	alternating	1.554509566	5.659720568	-3.704651199	1.259945717
*c1cc(F)c(*)cc1F	*c1cc(N)cc(*)c1C	0.5	0.5	block	2.194146376	5.592461643	-3.116185334	1.198740095
*c1cc(F)c(*)cc1F	*c1cc(N)cc(*)c1C	0.5	0.5	random	1.886983504	5.639303475	-3.398775176	1.241366162
*c1cc(F)c(*)cc1F	*c1cc(C(=O)O)c(*)cc1C(=O)O	0.5	0.5	alternating	3.332255854	7.379840838	-2.069124614	2.825255163
*c1cc(F)c(*)cc1F	*c1cc(C(=O)O)c(*)cc1C(=O)O	0.5	0.5	block	3.432186256	7.262285878	-1.977188645	2.718280149
*c1cc(F)c(*)cc1F	*c1cc(C(=O)O)c(*)cc1C(=O)O	0.5	0.5	random	3.374458859	7.337958151	-2.03029785	2.787141917
*c1cc(F)c(*)cc1F	*c1cc(F)c(*)c(F)c1	0.5	0.5	alternating	2.611765184	7.018503702	-2.731976031	2.496438369
*c1cc(F)c(*)cc1F	*c1cc(F)c(*)c(F)c1	0.5	0.5	block	2.669292906	6.996484653	-2.679050527	2.476401034
*c1cc(F)c(*)cc1F	*c1cc(F)c(*)c(F)c1	0.5	0.5	random	2.638197286	7.007913945	-2.707658497	2.48680169
*c1cc(F)c(*)cc1F	*c1cc(*)cc(CC(=O)OC)c1	0.5	0.5	alternating	2.267999917	6.849278851	-3.048240077	2.342443754
*c1cc(F)c(*)cc1F	*c1cc(*)cc(CC(=O)OC)c1	0.5	0.5	block	2.418951744	6.837262054	-2.909364395	2.33150847
*c1cc(F)c(*)cc1F	*c1cc(*)cc(CC(=O)OC)c1	0.5	0.5	random	2.369639449	6.845951622	-2.954731707	2.339415976
*c1cc(F)c(*)cc1F	*c1cc2c(*)c[nH]c2nc1C	0.5	0.5	alternating	1.948638407	5.957518457	-3.342052666	1.530941796
*c1cc(F)c(*)cc1F	*c1cc2c(*)c[nH]c2nc1C	0.5	0.5	block	2.285154516	5.820074145	-3.032457845	1.405867472
*c1cc(F)c(*)cc1F	*c1cc2c(*)c[nH]c2nc1C	0.5	0.5	random	2.082167661	5.843324281	-3.219205752	1.427025096
*c1cc(F)c(*)cc1F	*c1cc(C)nc(*)c1N	0.5	0.5	alternating	2.073240715	5.779913289	-3.227418542	1.369321093
*c1cc(F)c(*)cc1F	*c1cc(C)nc(*)c1N	0.5	0.5	block	2.321882063	5.34592835	-2.998668502	0.974394798
*c1cc(F)c(*)cc1F	*c1cc(C)nc(*)c1N	0.5	0.5	random	2.185310701	5.638272246	-3.124314155	1.240427744
*c1cc(F)c(*)cc1F	*c1ccc2cc(*)ccc2c1	0.5	0.5	alternating	2.509225958	6.195525743	-2.826312119	1.747528427
*c1cc(F)c(*)cc1F	*c1ccc2cc(*)ccc2c1	0.5	0.5	block	2.546311408	6.035029387	-2.792193505	1.601476742
*c1cc(F)c(*)cc1F	*c1ccc2cc(*)ccc2c1	0.5	0.5	random	2.523416457	6.134956853	-2.81325686	1.692410736
*c1cc(F)c(*)cc1F	*c1nc(*)c([N+](=O)[O-])cc1OC	0.5	0.5	alternating	3.828733797	6.901495041	-1.612364907	2.389960487
*c1cc(F)c(*)cc1F	*c1nc(*)c([N+](=O)[O-])cc1OC	0.5	0.5	block	3.819456722	6.888008495	-1.620899816	2.377687731
*c1cc(F)c(*)cc1F	*c1nc(*)c([N+](=O)[O-])cc1OC	0.5	0.5	random	3.841144524	6.875774541	-1.600947038	2.366554832
*c1cc(F)c(*)cc1F	*c1nc(C)c(*)s1	0.5	0.5	alternating	3.237628967	6.170217157	-2.156181351	1.724497613
*c1cc(F)c(*)cc1F	*c1nc(C)c(*)s1	0.5	0.5	block	3.222983845	5.935391748	-2.169654862	1.510806491
*c1cc(F)c(*)cc1F	*c1nc(C)c(*)s1	0.5	0.5	random	3.223886174	6.095563005	-2.16882472	1.656562335
*c1cc(F)c(*)cc1F	*c1ccc(*)[nH]1	0.5	0.5	alternating	2.276180112	5.279848236	-3.040714297	0.914261895
*c1cc(F)c(*)cc1F	*c1ccc(*)[nH]1	0.5	0.5	block	2.281140023	4.688365595	-3.036151179	0.376012692
*c1cc(F)c(*)cc1F	*c1ccc(*)[nH]1	0.5	0.5	random	2.221803493	5.087038323	-3.090740786	0.738804874
*c1cc(F)c(*)cc1F	*c1cc(F)cc(*)c1Cl	0.5	0.5	alternating	2.308362104	7.224895761	-3.011106864	2.684255143
*c1cc(F)c(*)cc1F	*c1cc(F)cc(*)c1Cl	0.5	0.5	block	2.522160806	7.150932678	-2.814412059	2.616948737
*c1cc(F)c(*)cc1F	*c1cc(F)cc(*)c1Cl	0.5	0.5	random	2.413641585	7.198696915	-2.914249741	2.660414192
*c1cc(F)c(*)cc1F	*c1cnnc(*)c1	0.5	0.5	alternating	3.105649031	6.835288874	-2.277602891	2.329712875
*c1cc(F)c(*)cc1F	*c1cnnc(*)c1	0.5	0.5	block	3.13346935	6.813846789	-2.252008198	2.310200578
*c1cc(F)c(*)cc1F	*c1cnnc(*)c1	0.5	0.5	random	3.113765409	6.823291692	-2.270135824	2.318795439
*c1cc(F)c(*)cc1F	*c1ccc2c(c1)-c1cc(*)ccc1S2(=O)=O	0.5	0.5	alternating	2.825390319	6.777905148	-2.535440906	2.277493685
*c1cc(F)c(*)cc1F	*c1ccc2c(c1)-c1cc(*)ccc1S2(=O)=O	0.5	0.5	block	2.791780999	6.772763035	-2.566361481	2.272814362
*c1cc(F)c(*)cc1F	*c1ccc2c(c1)-c1cc(*)ccc1S2(=O)=O	0.5	0.5	random	2.809772276	6.7800603	-2.549809506	2.279454873
*c1cc(F)c(*)cc1F	*c1cnc(*)c(N)c1	0.5	0.5	alternating	2.222704817	5.839068945	-3.089911569	1.42315274
*c1cc(F)c(*)cc1F	*c1cnc(*)c(N)c1	0.5	0.5	block	2.393841966	5.439484241	-2.932465391	1.05953066
*c1cc(F)c(*)cc1F	*c1cnc(*)c(N)c1	0.5	0.5	random	2.290673481	5.694238389	-3.027380398	1.291356934
*c1cc(F)c(*)cc1F	*c1cc(Cl)c(N)c(*)c1OC	0.5	0.5	alternating	1.951386431	5.909360939	-3.339524484	1.487118455
*c1cc(F)c(*)cc1F	*c1cc(Cl)c(N)c(*)c1OC	0.5	0.5	block	2.349675119	5.877625488	-2.973098891	1.458239194
*c1cc(F)c(*)cc1F	*c1cc(Cl)c(N)c(*)c1OC	0.5	0.5	random	2.127171744	5.879832702	-3.177801995	1.460247759
*c1cc(F)c(*)cc1F	*c1cnc(*)c(N)n1	0.5	0.5	alternating	2.834427655	5.99724792	-2.527126558	1.567095607
*c1cc(F)c(*)cc1F	*c1cnc(*)c(N)n1	0.5	0.5	block	2.922780067	5.588208304	-2.445842338	1.194869557
*c1cc(F)c(*)cc1F	*c1cnc(*)c(N)n1	0.5	0.5	random	2.882852432	5.814011027	-2.482575763	1.400350035
*c1cc(F)c(*)cc1F	*c1ccc(*)c2[nH]ccc12	0.5	0.5	alternating	2.121738689	5.695451898	-3.182800406	1.292461227
*c1cc(F)c(*)cc1F	*c1ccc(*)c2[nH]ccc12	0.5	0.5	block	2.316109473	5.398081818	-3.003979284	1.021854454
*c1cc(F)c(*)cc1F	*c1ccc(*)c2[nH]ccc12	0.5	0.5	random	2.166801041	5.578829123	-3.141343042	1.186334502
*c1cc(F)c(*)cc1F	*c1nc([N+](=O)[O-])c(*)[nH]1	0.5	0.5	alternating	3.418326113	6.782961283	-1.989939976	2.282094767
*c1cc(F)c(*)cc1F	*c1nc([N+](=O)[O-])c(*)[nH]1	0.5	0.5	block	3.562287941	6.837673696	-1.857495094	2.331883063
*c1cc(F)c(*)cc1F	*c1nc([N+](=O)[O-])c(*)[nH]1	0.5	0.5	random	3.470973137	6.802400143	-1.941504714	2.29978413
*c1cc(F)c(*)cc1F	*c1cc(I)c(*)cc1I	0.5	0.5	alternating	1.579628125	6.391966617	-3.681542125	1.926289622
*c1cc(F)c(*)cc1F	*c1cc(I)c(*)cc1I	0.5	0.5	block	2.222048802	6.186667728	-3.090515103	1.739467632
*c1cc(F)c(*)cc1F	*c1cc(I)c(*)cc1I	0.5	0.5	random	1.838381094	6.314186104	-3.443489394	1.855509354
*c1cc(F)c(*)cc1F	*c1cncc(*)n1	0.5	0.5	alternating	2.992722608	6.677974988	-2.381495201	2.186557239
*c1cc(F)c(*)cc1F	*c1cncc(*)n1	0.5	0.5	block	2.919756868	6.533067746	-2.448623681	2.054691649
*c1cc(F)c(*)cc1F	*c1cncc(*)n1	0.5	0.5	random	2.96139342	6.62772177	-2.410318054	2.14082681
*c1cc(F)c(*)cc1F	*c1cc2c(cc1*)C(=O)OC2=O	0.5	0.5	alternating	4.141939157	7.717051704	-1.324215976	3.132117051
*c1cc(F)c(*)cc1F	*c1cc2c(cc1*)C(=O)OC2=O	0.5	0.5	block	4.371995201	7.430583975	-1.112564415	2.871431418
*c1cc(F)c(*)cc1F	*c1cc2c(cc1*)C(=O)OC2=O	0.5	0.5	random	4.185147551	7.622856767	-1.284464253	3.046399658
*c1cc(F)c(*)cc1F	*c1cccc(*)c1COC(C)=O	0.5	0.5	alternating	2.134516204	7.080938751	-3.171045093	2.553254263
*c1cc(F)c(*)cc1F	*c1cccc(*)c1COC(C)=O	0.5	0.5	block	2.367501103	7.047710532	-2.956698985	2.523016584
*c1cc(F)c(*)cc1F	*c1cccc(*)c1COC(C)=O	0.5	0.5	random	2.191669775	7.111509686	-3.118463807	2.581073814
*c1cc(F)c(*)cc1F	*c1cc(Cl)c(F)c(*)c1N	0.5	0.5	alternating	2.036350753	6.034165307	-3.261357307	1.60069043
*c1cc(F)c(*)cc1F	*c1cc(Cl)c(F)c(*)c1N	0.5	0.5	block	2.350489811	6.058822747	-2.972349374	1.6231287
*c1cc(F)c(*)cc1F	*c1cc(Cl)c(F)c(*)c1N	0.5	0.5	random	2.171849071	6.050075649	-3.136698854	1.61516884
*c1cc(F)c(*)cc1F	*c1cc(C=O)cc(*)n1	0.5	0.5	alternating	3.468267191	6.976320813	-1.943994184	2.45805194
*c1cc(F)c(*)cc1F	*c1cc(C=O)cc(*)n1	0.5	0.5	block	3.373585664	6.933519227	-2.031101189	2.419102497
*c1cc(F)c(*)cc1F	*c1cc(C=O)cc(*)n1	0.5	0.5	random	3.435236103	6.971328384	-1.974382785	2.453508829
*c1cc(F)c(*)cc1F	*c1c(F)c(*)c(F)c(F)c1F	0.5	0.5	alternating	2.718291706	7.393205658	-2.633971631	2.837417149
*c1cc(F)c(*)cc1F	*c1c(F)c(*)c(F)c(F)c1F	0.5	0.5	block	2.755170037	7.249347985	-2.600043566	2.706506666
*c1cc(F)c(*)cc1F	*c1c(F)c(*)c(F)c(F)c1F	0.5	0.5	random	2.719686745	7.336883455	-2.632688195	2.786163944
*c1cc(F)c(*)cc1F	*c1cc(*)cc(OC(C)C)c1	0.5	0.5	alternating	2.112049736	6.379071314	-3.191714243	1.914554895
*c1cc(F)c(*)cc1F	*c1cc(*)cc(OC(C)C)c1	0.5	0.5	block	2.387162236	6.335798227	-2.938610743	1.875176387
*c1cc(F)c(*)cc1F	*c1cc(*)cc(OC(C)C)c1	0.5	0.5	random	2.218752266	6.361175266	-3.093547916	1.898269492
*c1cc(F)c(*)cc1F	*c1ccc2nccc(*)c2c1	0.5	0.5	alternating	2.840450838	6.663347647	-2.521585229	2.173246359
*c1cc(F)c(*)cc1F	*c1ccc2nccc(*)c2c1	0.5	0.5	block	2.819351034	6.664136943	-2.540997048	2.173964618
*c1cc(F)c(*)cc1F	*c1ccc2nccc(*)c2c1	0.5	0.5	random	2.830084305	6.667020373	-2.53112244	2.176588539
*c1cc(F)c(*)cc1F	*c1ccc2sc(*)nc2c1	0.5	0.5	alternating	3.096744618	6.453620234	-2.285794951	1.982394413
*c1cc(F)c(*)cc1F	*c1ccc2sc(*)nc2c1	0.5	0.5	block	2.964685782	6.419828373	-2.407289081	1.95164382
*c1cc(F)c(*)cc1F	*c1ccc2sc(*)nc2c1	0.5	0.5	random	3.113423686	6.445532797	-2.270450209	1.975034845
*c1cc(F)c(*)cc1F	*c1ccc(*)c(F)c1C	0.5	0.5	alternating	2.238873796	6.924180709	-3.075036108	2.410604445
*c1cc(F)c(*)cc1F	*c1ccc(*)c(F)c1C	0.5	0.5	block	2.397452247	6.915170483	-2.929143933	2.402405139
*c1cc(F)c(*)cc1F	*c1ccc(*)c(F)c1C	0.5	0.5	random	2.308661804	6.91382338	-3.010831141	2.401179276
*c1cc(F)c(*)cc1F	*c1cnc(*)n1C	0.5	0.5	alternating	2.219722857	6.020194735	-3.092654972	1.587977209
*c1cc(F)c(*)cc1F	*c1cnc(*)n1C	0.5	0.5	block	2.365269489	5.650345464	-2.95875207	1.251414372
*c1cc(F)c(*)cc1F	*c1cnc(*)n1C	0.5	0.5	random	2.261391579	5.85799758	-3.054319748	1.440377798
*c1cc(F)c(*)cc1F	*c1c[nH]cc(*)c1=O	0.5	0.5	alternating	2.216643752	6.147009502	-3.095487748	1.703378647
*c1cc(F)c(*)cc1F	*c1c[nH]cc(*)c1=O	0.5	0.5	block	2.32398651	5.883521445	-2.996732411	1.463604515
*c1cc(F)c(*)cc1F	*c1c[nH]cc(*)c1=O	0.5	0.5	random	2.30671084	6.029558438	-3.012626028	1.596498178
*c1cc(F)c(*)cc1F	*c1cc(C(=O)O)c(*)s1	0.5	0.5	alternating	3.332220411	6.477745099	-2.069157222	2.00434804
*c1cc(F)c(*)cc1F	*c1cc(C(=O)O)c(*)s1	0.5	0.5	block	3.387208057	6.406395834	-2.018568587	1.939420209
*c1cc(F)c(*)cc1F	*c1cc(C(=O)O)c(*)s1	0.5	0.5	random	3.305215802	6.502273848	-2.094001462	2.026669202
*c1cc(F)c(*)cc1F	*c1cc(*)c(N)nn1	0.5	0.5	alternating	2.594491719	6.208282554	-2.747867618	1.759137125
*c1cc(F)c(*)cc1F	*c1cc(*)c(N)nn1	0.5	0.5	block	2.605894366	6.087173615	-2.737377184	1.64892799
*c1cc(F)c(*)cc1F	*c1cc(*)c(N)nn1	0.5	0.5	random	2.613941135	6.171045024	-2.729974156	1.725250971
*c1cc(F)c(*)cc1F	*c1cc(C(=O)NN)cc(*)c1O	0.5	0.5	alternating	2.151003861	6.412439974	-3.155876448	1.944920376
*c1cc(F)c(*)cc1F	*c1cc(C(=O)NN)cc(*)c1O	0.5	0.5	block	2.434101102	6.40886006	-2.895426987	1.941662654
*c1cc(F)c(*)cc1F	*c1cc(C(=O)NN)cc(*)c1O	0.5	0.5	random	2.275242776	6.40860853	-3.041576647	1.941433762
*c1cc(F)c(*)cc1F	*c1cc(*)c(OCc2ccccc2)c(C=O)c1	0.5	0.5	alternating	2.941549643	6.727718823	-2.428574329	2.231824129
*c1cc(F)c(*)cc1F	*c1cc(*)c(OCc2ccccc2)c(C=O)c1	0.5	0.5	block	2.922646972	6.72328099	-2.445964786	2.227785701
*c1cc(F)c(*)cc1F	*c1cc(*)c(OCc2ccccc2)c(C=O)c1	0.5	0.5	random	2.919903741	6.699942219	-2.448488558	2.206547419
*c1cc(F)c(*)cc1F	*c1ccnc(*)c1N	0.5	0.5	alternating	2.081481191	5.873357921	-3.219837304	1.454355708
*c1cc(F)c(*)cc1F	*c1ccnc(*)c1N	0.5	0.5	block	2.342994166	5.449334486	-2.979245367	1.068494383
*c1cc(F)c(*)cc1F	*c1ccnc(*)c1N	0.5	0.5	random	2.194543355	5.689812082	-3.115820114	1.287328994
*c1cc(F)c(*)cc1F	*c1cc(*)c([N+](=O)[O-])c(C)c1	0.5	0.5	alternating	3.578043663	7.298980143	-1.84299983	2.75167193
*c1cc(F)c(*)cc1F	*c1cc(*)c([N+](=O)[O-])c(C)c1	0.5	0.5	block	3.626826342	7.222399172	-1.798119766	2.681983247
*c1cc(F)c(*)cc1F	*c1cc(*)c([N+](=O)[O-])c(C)c1	0.5	0.5	random	3.58479652	7.262000732	-1.836787202	2.718020666
*c1cc(F)c(*)cc1F	*c1cnc(F)c(*)c1C	0.5	0.5	alternating	2.221132098	7.152727474	-3.09135847	2.618582001
*c1cc(F)c(*)cc1F	*c1cnc(F)c(*)c1C	0.5	0.5	block	2.429981246	7.069674585	-2.899217254	2.543003872
*c1cc(F)c(*)cc1F	*c1cnc(F)c(*)c1C	0.5	0.5	random	2.320685684	7.113429184	-2.999769171	2.582820557
*c1cc(F)c(*)cc1F	*c1cc(C=CC(=O)O)cc(*)c1OC(C)C	0.5	0.5	alternating	2.752232913	6.541302603	-2.60274572	2.062185368
*c1cc(F)c(*)cc1F	*c1cc(C=CC(=O)O)cc(*)c1OC(C)C	0.5	0.5	block	2.668696981	6.549181713	-2.679598777	2.069355359
*c1cc(F)c(*)cc1F	*c1cc(C=CC(=O)O)cc(*)c1OC(C)C	0.5	0.5	random	2.794784561	6.545815828	-2.563598204	2.066292403
*c1cc(F)c(*)cc1F	*c1ccc2nc(*)nn2c1	0.5	0.5	alternating	2.746803476	6.581155127	-2.607740802	2.098451165
*c1cc(F)c(*)cc1F	*c1ccc2nc(*)nn2c1	0.5	0.5	block	2.67749066	6.572523084	-2.671508593	2.090596007
*c1cc(F)c(*)cc1F	*c1ccc2nc(*)nn2c1	0.5	0.5	random	2.718243491	6.582701705	-2.634015988	2.099858552
*c1cc(F)c(*)cc1F	*c1ccc(Cl)c(*)c1	0.5	0.5	alternating	2.367547228	6.870388622	-2.95665655	2.361653646
*c1cc(F)c(*)cc1F	*c1ccc(Cl)c(*)c1	0.5	0.5	block	2.483154362	6.866509806	-2.850297987	2.358123924
*c1cc(F)c(*)cc1F	*c1ccc(Cl)c(*)c1	0.5	0.5	random	2.407931455	6.888345761	-2.919503061	2.377994642
*c1cc(F)c(*)cc1F	*c1cc(C)nc(*)c1O	0.5	0.5	alternating	2.457790547	6.566634013	-2.873632697	2.085236952
*c1cc(F)c(*)cc1F	*c1cc(C)nc(*)c1O	0.5	0.5	block	2.632644399	6.329565363	-2.712767153	1.86950448
*c1cc(F)c(*)cc1F	*c1cc(C)nc(*)c1O	0.5	0.5	random	2.55952644	6.422044311	-2.780035675	1.953660323
*c1cc(F)c(*)cc1F	*c1cc(C)cc(*)c1O	0.5	0.5	alternating	2.035595182	6.350506674	-3.262052432	1.888561073
*c1cc(F)c(*)cc1F	*c1cc(C)cc(*)c1O	0.5	0.5	block	2.307404353	6.339955513	-3.011987996	1.878959517
*c1cc(F)c(*)cc1F	*c1cc(C)cc(*)c1O	0.5	0.5	random	2.167604723	6.356244455	-3.140603655	1.893782454
*c1cc(F)c(*)cc1F	*c1cc(*)c2c(c1)CC(=O)N2	0.5	0.5	alternating	2.168650228	6.255023293	-3.13964179	1.801671196
*c1cc(F)c(*)cc1F	*c1cc(*)c2c(c1)CC(=O)N2	0.5	0.5	block	2.368063427	6.169430704	-2.956181647	1.723781941
*c1cc(F)c(*)cc1F	*c1cc(*)c2c(c1)CC(=O)N2	0.5	0.5	random	2.266315405	6.212101409	-3.049789827	1.762612282
*c1cc(F)c(*)cc1F	*c1sc(*)c2c1OCCO2	0.5	0.5	alternating	2.940316874	5.619705233	-2.429708476	1.223531762
*c1cc(F)c(*)cc1F	*c1sc(*)c2c1OCCO2	0.5	0.5	block	2.770947561	5.179567159	-2.585528244	0.823006115
*c1cc(F)c(*)cc1F	*c1sc(*)c2c1OCCO2	0.5	0.5	random	2.84835893	5.484687593	-2.514309784	1.100665709
*c1cc(F)c(*)cc1F	*c1cc(*)c2cccnc2c1OC	0.5	0.5	alternating	2.630262537	6.058709965	-2.714958466	1.623026068
*c1cc(F)c(*)cc1F	*c1cc(*)c2cccnc2c1OC	0.5	0.5	block	2.648325906	6.005865155	-2.698340167	1.574937291
*c1cc(F)c(*)cc1F	*c1cc(*)c2cccnc2c1OC	0.5	0.5	random	2.634044345	6.034597217	-2.711479203	1.601083468
*c1cc(F)c(*)cc1F	*c1ccc2c(*)ccnc2c1	0.5	0.5	alternating	2.822376095	6.679727577	-2.538213992	2.188152095
*c1cc(F)c(*)cc1F	*c1ccc2c(*)ccnc2c1	0.5	0.5	block	2.78119675	6.655905251	-2.57609899	2.166473778
*c1cc(F)c(*)cc1F	*c1ccc2c(*)ccnc2c1	0.5	0.5	random	2.805141432	6.661571195	-2.554069883	2.171629788
*c1cc(F)c(*)cc1F	*c1ccc(*)c(CCl)c1	0.5	0.5	alternating	2.327532559	6.905089	-2.993470045	2.39323099
*c1cc(F)c(*)cc1F	*c1ccc(*)c(CCl)c1	0.5	0.5	block	2.436844234	6.89294943	-2.892903305	2.382183982
*c1cc(F)c(*)cc1F	*c1ccc(*)c(CCl)c1	0.5	0.5	random	2.386593137	6.87715401	-2.939134314	2.367810149
*c1cc(F)c(*)cc1F	*c1cnc(OC)c(*)c1OC	0.5	0.5	alternating	2.066112899	6.60854536	-3.233976133	2.123376277
*c1cc(F)c(*)cc1F	*c1cnc(OC)c(*)c1OC	0.5	0.5	block	2.477850077	6.631572414	-2.85517793	2.144330897
*c1cc(F)c(*)cc1F	*c1cnc(OC)c(*)c1OC	0.5	0.5	random	2.268048688	6.625350555	-3.048195207	2.138669005
*c1cc(F)c(*)cc1F	*c1cc(*)c(Cl)c(CC)c1	0.5	0.5	alternating	2.341854209	6.851222489	-2.980294128	2.344212465
*c1cc(F)c(*)cc1F	*c1cc(*)c(Cl)c(CC)c1	0.5	0.5	block	2.461052818	6.847590922	-2.870631407	2.340907739
*c1cc(F)c(*)cc1F	*c1cc(*)c(Cl)c(CC)c1	0.5	0.5	random	2.388657057	6.866452107	-2.937235508	2.358071417
*c1cc(F)c(*)cc1F	*c1cnc(*)[nH]1	0.5	0.5	alternating	2.5692184	5.744620192	-2.771119072	1.337204374
*c1cc(F)c(*)cc1F	*c1cnc(*)[nH]1	0.5	0.5	block	2.388751062	5.476131995	-2.937149023	1.092880116
*c1cc(F)c(*)cc1F	*c1cnc(*)[nH]1	0.5	0.5	random	2.459711498	5.698604876	-2.871865422	1.295330437
*c1cc(F)c(*)cc1F	*c1ccc(*)c(C(=O)O)n1	0.5	0.5	alternating	3.003788047	7.036816497	-2.371314997	2.513103012
*c1cc(F)c(*)cc1F	*c1ccc(*)c(C(=O)O)n1	0.5	0.5	block	3.025298217	7.029832361	-2.35152564	2.506747448
*c1cc(F)c(*)cc1F	*c1ccc(*)c(C(=O)O)n1	0.5	0.5	random	3.030403098	7.036317299	-2.34682915	2.512648742
*c1cc(F)c(*)cc1F	*c1cc(*)c2cc[nH]c2c1	0.5	0.5	alternating	1.905885542	5.694324489	-3.381385302	1.291435285
*c1cc(F)c(*)cc1F	*c1cc(*)c2cc[nH]c2c1	0.5	0.5	block	2.267296105	5.423633854	-3.048887583	1.045106807
*c1cc(F)c(*)cc1F	*c1cc(*)c2cc[nH]c2c1	0.5	0.5	random	2.038962061	5.590124583	-3.258954904	1.196613371
*c1cc(F)c(*)cc1F	*c1cc(*)c(O)c(C#N)c1	0.5	0.5	alternating	2.459502518	6.668957638	-2.872057683	2.17835145
*c1cc(F)c(*)cc1F	*c1cc(*)c(O)c(C#N)c1	0.5	0.5	block	2.572808519	6.689440046	-2.767816162	2.196990441
*c1cc(F)c(*)cc1F	*c1cc(*)c(O)c(C#N)c1	0.5	0.5	random	2.525217084	6.693880254	-2.811600283	2.201031031
*c1cc(F)c(*)cc1F	*c1ccc(N)c(*)c1C	0.5	0.5	alternating	1.476316182	5.689434786	-3.776589113	1.286985655
*c1cc(F)c(*)cc1F	*c1ccc(N)c(*)c1C	0.5	0.5	block	2.231574894	5.578605312	-3.081751097	1.186130834
*c1cc(F)c(*)cc1F	*c1ccc(N)c(*)c1C	0.5	0.5	random	1.805279303	5.660600928	-3.473943042	1.260746844
*c1cc(F)c(*)cc1F	*c1cc(*)nc(N)n1	0.5	0.5	alternating	2.981486523	6.414530726	-2.391832399	1.946822961
*c1cc(F)c(*)cc1F	*c1cc(*)nc(N)n1	0.5	0.5	block	2.892969705	6.383266117	-2.473267872	1.918372166
*c1cc(F)c(*)cc1F	*c1cc(*)nc(N)n1	0.5	0.5	random	2.918029311	6.407247101	-2.450213034	1.940194862
*c1cc(F)c(*)cc1F	*c1nc(C#N)c(*)n1C	0.5	0.5	alternating	2.552347308	6.518005448	-2.786640477	2.040984958
*c1cc(F)c(*)cc1F	*c1nc(C#N)c(*)n1C	0.5	0.5	block	2.527838485	6.453446901	-2.809188594	1.98223668
*c1cc(F)c(*)cc1F	*c1nc(C#N)c(*)n1C	0.5	0.5	random	2.516343602	6.493114724	-2.819763887	2.018334399
*c1cc(F)c(*)cc1F	*c1cc(C(=O)OC)c(*)[nH]1	0.5	0.5	alternating	2.562609531	5.95320077	-2.777199231	1.527012701
*c1cc(F)c(*)cc1F	*c1cc(C(=O)OC)c(*)[nH]1	0.5	0.5	block	2.531924842	5.616099236	-2.805429145	1.220250304
*c1cc(F)c(*)cc1F	*c1cc(C(=O)OC)c(*)[nH]1	0.5	0.5	random	2.540416172	5.832799305	-2.797617121	1.417447368
*c1cc(F)c(*)cc1F	*c1ccc(*)c(Cl)c1F	0.5	0.5	alternating	2.556546061	7.106212205	-2.782777624	2.576253107
*c1cc(F)c(*)cc1F	*c1ccc(*)c(Cl)c1F	0.5	0.5	block	2.588219315	7.085284246	-2.75363823	2.557208663
*c1cc(F)c(*)cc1F	*c1ccc(*)c(Cl)c1F	0.5	0.5	random	2.565442582	7.0984686	-2.774592824	2.569206426
*c1cc(F)c(*)cc1F	*c1cc(*)c2c(c1)CCCN2	0.5	0.5	alternating	1.635768156	5.379457036	-3.629893296	1.004905903
*c1cc(F)c(*)cc1F	*c1cc(*)c2c(c1)CCCN2	0.5	0.5	block	2.256755987	5.144447787	-3.058584492	0.791047486
*c1cc(F)c(*)cc1F	*c1cc(*)c2c(c1)CCCN2	0.5	0.5	random	1.923505384	5.259111911	-3.365175047	0.895391839
*c1cc(F)c(*)cc1F	*c1ccc(*)c(CC#N)c1	0.5	0.5	alternating	2.2889849	6.828622111	-3.028933892	2.323646121
*c1cc(F)c(*)cc1F	*c1ccc(*)c(CC#N)c1	0.5	0.5	block	2.402908147	6.832452652	-2.924124504	2.327131913
*c1cc(F)c(*)cc1F	*c1ccc(*)c(CC#N)c1	0.5	0.5	random	2.336610026	6.833856928	-2.985118776	2.328409805
*c1cc(F)c(*)cc1F	*c1nc(*)c(C)cc1C	0.5	0.5	alternating	2.056383549	6.800063121	-3.242927135	2.29765744
*c1cc(F)c(*)cc1F	*c1nc(*)c(C)cc1C	0.5	0.5	block	2.34025938	6.553604973	-2.98176137	2.073380525
*c1cc(F)c(*)cc1F	*c1nc(*)c(C)cc1C	0.5	0.5	random	2.215428191	6.648558961	-3.096606064	2.159788655
*c1cc(F)c(*)cc1F	*c1ccc2[nH]c3ccc(*)cc3c2c1	0.5	0.5	alternating	1.858407994	5.66324234	-3.425064645	1.26315053
*c1cc(F)c(*)cc1F	*c1ccc2[nH]c3ccc(*)cc3c2c1	0.5	0.5	block	2.293875176	5.407983665	-3.024434838	1.030865135
*c1cc(F)c(*)cc1F	*c1ccc2[nH]c3ccc(*)cc3c2c1	0.5	0.5	random	2.007983353	5.556433306	-3.287455315	1.165954308
*c1cc(F)c(*)cc1F	*c1cc2c(c(*)c1N)OC(F)(F)O2	0.5	0.5	alternating	2.282675662	5.955863601	-3.034738391	1.529435877
*c1cc(F)c(*)cc1F	*c1cc2c(c(*)c1N)OC(F)(F)O2	0.5	0.5	block	2.52592358	6.042234072	-2.810950306	1.608033006
*c1cc(F)c(*)cc1F	*c1cc2c(c(*)c1N)OC(F)(F)O2	0.5	0.5	random	2.393907979	5.994973661	-2.93240466	1.565026032
*c1cc(F)c(*)cc1F	*c1ccc(*)c(N)n1	0.5	0.5	alternating	2.431398139	5.873024985	-2.897913712	1.454052737
*c1cc(F)c(*)cc1F	*c1ccc(*)c(N)n1	0.5	0.5	block	2.499424856	5.521730953	-2.835329132	1.134375167
*c1cc(F)c(*)cc1F	*c1ccc(*)c(N)n1	0.5	0.5	random	2.437203774	5.724452243	-2.892572528	1.318851541
*c1cc(F)c(*)cc1F	*c1ccc(CC(=O)O)c(*)c1	0.5	0.5	alternating	2.232447896	6.895512722	-3.080947935	2.384516577
*c1cc(F)c(*)cc1F	*c1ccc(CC(=O)O)c(*)c1	0.5	0.5	block	2.443409326	6.876040532	-2.88686342	2.366796884
*c1cc(F)c(*)cc1F	*c1ccc(CC(=O)O)c(*)c1	0.5	0.5	random	2.317048626	6.904251919	-3.003115264	2.392469246
*c1cc(F)c(*)cc1F	*c1ccc2ncc(*)n2c1	0.5	0.5	alternating	2.153380118	5.849987004	-3.153690292	1.433088174
*c1cc(F)c(*)cc1F	*c1ccc2ncc(*)n2c1	0.5	0.5	block	2.342622018	5.712396635	-2.979587744	1.307880938
*c1cc(F)c(*)cc1F	*c1ccc2ncc(*)n2c1	0.5	0.5	random	2.239801654	5.791053787	-3.074182478	1.379458947
*c1cc(F)c(*)cc1F	*c1cc(*)c(N)c([N+]([O-])=NC(C)(C)C)c1	0.5	0.5	alternating	2.87460918	5.936823774	-2.490159554	1.512109634
*c1cc(F)c(*)cc1F	*c1cc(*)c(N)c([N+]([O-])=NC(C)(C)C)c1	0.5	0.5	block	2.881456054	5.801676483	-2.48386043	1.389125599
*c1cc(F)c(*)cc1F	*c1cc(*)c(N)c([N+]([O-])=NC(C)(C)C)c1	0.5	0.5	random	2.871810621	5.86065515	-2.492734229	1.442796187
*c1cc(F)c(*)cc1F	*c1sc(*)c2c1C(=O)OC2=O	0.5	0.5	alternating	4.316841776	7.048311708	-1.163305566	2.523563654
*c1cc(F)c(*)cc1F	*c1sc(*)c2c1C(=O)OC2=O	0.5	0.5	block	4.613714047	7.204844567	-0.890183077	2.666008556
*c1cc(F)c(*)cc1F	*c1sc(*)c2c1C(=O)OC2=O	0.5	0.5	random	4.358140371	7.14812678	-1.125310859	2.61439537
*c1cc(F)c(*)cc1F	*c1ccc(*)c2sc(Cl)nc12	0.5	0.5	alternating	2.866471616	6.596433986	-2.497646114	2.112354927
*c1cc(F)c(*)cc1F	*c1ccc(*)c2sc(Cl)nc12	0.5	0.5	block	2.826148638	6.552546882	-2.534743253	2.072417662
*c1cc(F)c(*)cc1F	*c1ccc(*)c2sc(Cl)nc12	0.5	0.5	random	2.855014213	6.577087508	-2.508186924	2.094749632
*c1cc(F)c(*)cc1F	*c1c(C)c(C)c(*)c(C)c1C	0.5	0.5	alternating	1.808427672	6.651830785	-3.471046542	2.162766014
*c1cc(F)c(*)cc1F	*c1c(C)c(C)c(*)c(C)c1C	0.5	0.5	block	2.328359565	6.610641836	-2.9927092	2.125284071
*c1cc(F)c(*)cc1F	*c1c(C)c(C)c(*)c(C)c1C	0.5	0.5	random	2.003547963	6.655399623	-3.291535874	2.166013657
*c1cc(F)c(*)cc1F	*c1cc(OC)c(O)c(C=O)c1*	0.5	0.5	alternating	3.014349475	6.476947295	-2.361598483	2.003622038
*c1cc(F)c(*)cc1F	*c1cc(OC)c(O)c(C=O)c1*	0.5	0.5	block	3.095817415	6.544922044	-2.286647978	2.06547906
*c1cc(F)c(*)cc1F	*c1cc(OC)c(O)c(C=O)c1*	0.5	0.5	random	3.042546396	6.492146379	-2.335657316	2.017453205
*c1cc(F)c(*)cc1F	*c1cc(C(F)(F)F)cc(*)c1N	0.5	0.5	alternating	2.090460953	6.03356091	-3.211575923	1.600140428
*c1cc(F)c(*)cc1F	*c1cc(C(F)(F)F)cc(*)c1N	0.5	0.5	block	2.40727056	6.022132135	-2.920111084	1.589740243
*c1cc(F)c(*)cc1F	*c1cc(C(F)(F)F)cc(*)c1N	0.5	0.5	random	2.198715	6.030211488	-3.1119822	1.597092454
*c1cc(F)c(*)cc1F	*c1cc(C(F)(F)F)cc(*)c1O	0.5	0.5	alternating	2.423178098	6.873182022	-2.90547615	2.36419564
*c1cc(F)c(*)cc1F	*c1cc(C(F)(F)F)cc(*)c1O	0.5	0.5	block	2.52533846	6.956774954	-2.811488617	2.440265208
*c1cc(F)c(*)cc1F	*c1cc(C(F)(F)F)cc(*)c1O	0.5	0.5	random	2.465515045	6.910888286	-2.866526159	2.39850834
*c1cc(F)c(*)cc1F	*c1cc(Cl)c(*)cc1F	0.5	0.5	alternating	2.599522653	7.056335721	-2.743239159	2.530865506
*c1cc(F)c(*)cc1F	*c1cc(Cl)c(*)cc1F	0.5	0.5	block	2.62183376	7.047345822	-2.722712941	2.522684698
*c1cc(F)c(*)cc1F	*c1cc(Cl)c(*)cc1F	0.5	0.5	random	2.624461193	7.047618153	-2.720295703	2.522932519
*c1cc(F)c(*)cc1F	*c1nc(*)c(C(=O)O)cc1Cl	0.5	0.5	alternating	3.301234106	7.319043236	-2.097664623	2.769929344
*c1cc(F)c(*)cc1F	*c1nc(*)c(C(=O)O)cc1Cl	0.5	0.5	block	3.364703966	7.192889882	-2.039272351	2.655129792
*c1cc(F)c(*)cc1F	*c1nc(*)c(C(=O)O)cc1Cl	0.5	0.5	random	3.341797721	7.252464417	-2.060346097	2.709342619
*c1cc(F)c(*)cc1F	*c1cncc(*)c1C#N	0.5	0.5	alternating	3.143194723	7.197707442	-2.243060854	2.659513773
*c1cc(F)c(*)cc1F	*c1cncc(*)c1C#N	0.5	0.5	block	3.153006815	7.141081684	-2.23403373	2.607984332
*c1cc(F)c(*)cc1F	*c1cncc(*)c1C#N	0.5	0.5	random	3.169483052	7.166770584	-2.218875592	2.631361231
*c1cc(F)c(*)cc1F	*c1ccc(*)c(NC(=S)c2ccccc2)c1	0.5	0.5	alternating	2.78291038	5.688690917	-2.574522451	1.286308734
*c1cc(F)c(*)cc1F	*c1ccc(*)c(NC(=S)c2ccccc2)c1	0.5	0.5	block	2.788385575	5.652873024	-2.569485271	1.253714451
*c1cc(F)c(*)cc1F	*c1ccc(*)c(NC(=S)c2ccccc2)c1	0.5	0.5	random	2.782821952	5.673962141	-2.574603804	1.272905548
*c1cc(F)c(*)cc1F	*c1cc(*)c2c(c1)OCCC2N	0.5	0.5	alternating	1.902438706	6.233002392	-3.384556391	1.781632177
*c1cc(F)c(*)cc1F	*c1cc(*)c2c(c1)OCCC2N	0.5	0.5	block	2.287295508	6.187449955	-3.030488133	1.740179459
*c1cc(F)c(*)cc1F	*c1cc(*)c2c(c1)OCCC2N	0.5	0.5	random	2.09216896	6.223409503	-3.210004557	1.772902647
*c1cc(F)c(*)cc1F	*c1cn2ncnc2c(*)n1	0.5	0.5	alternating	3.127322588	6.626979281	-2.257663219	2.140151146
*c1cc(F)c(*)cc1F	*c1cn2ncnc2c(*)n1	0.5	0.5	block	2.946062985	6.663763162	-2.424422054	2.173624478
*c1cc(F)c(*)cc1F	*c1cn2ncnc2c(*)n1	0.5	0.5	random	3.055920687	6.630816439	-2.323352968	2.143642959
*c1cc(F)c(*)cc1F	*c1cnc(*)c(F)c1	0.5	0.5	alternating	2.856041725	6.913383417	-2.507241613	2.40077891
*c1cc(F)c(*)cc1F	*c1cnc(*)c(F)c1	0.5	0.5	block	2.926631816	6.895643039	-2.442298729	2.384635166
*c1cc(F)c(*)cc1F	*c1cnc(*)c(F)c1	0.5	0.5	random	2.884121869	6.907224142	-2.48140788	2.39517397
*c1cc(F)c(*)cc1F	*c1ccc(*)c(CC)c1	0.5	0.5	alternating	2.011590667	6.727784402	-3.284136586	2.231883806
*c1cc(F)c(*)cc1F	*c1ccc(*)c(CC)c1	0.5	0.5	block	2.325021532	6.651250377	-2.99578019	2.162237843
*c1cc(F)c(*)cc1F	*c1ccc(*)c(CC)c1	0.5	0.5	random	2.147914377	6.689532717	-3.158718773	2.197074772
*c1cc(F)c(*)cc1F	*c1cc(N)c([N+](=O)[O-])c(*)n1	0.5	0.5	alternating	3.53316449	6.886515111	-1.884288669	2.376328751
*c1cc(F)c(*)cc1F	*c1cc(N)c([N+](=O)[O-])c(*)n1	0.5	0.5	block	3.444341906	6.82214623	-1.966005446	2.31775307
*c1cc(F)c(*)cc1F	*c1cc(N)c([N+](=O)[O-])c(*)n1	0.5	0.5	random	3.492055995	6.845856953	-1.922108485	2.339329827
*c1cc(F)c(*)cc1F	*c1cc([N+](=O)[O-])c(*)cc1C	0.5	0.5	alternating	3.56805461	7.30218354	-1.852189759	2.754587021
*c1cc(F)c(*)cc1F	*c1cc([N+](=O)[O-])c(*)cc1C	0.5	0.5	block	3.657877031	7.200703228	-1.769553131	2.662239938
*c1cc(F)c(*)cc1F	*c1cc([N+](=O)[O-])c(*)cc1C	0.5	0.5	random	3.599240059	7.24996752	-1.823499145	2.707070443
*c1cc(F)c(*)cc1F	*c1ccc(S)c(*)c1	0.5	0.5	alternating	2.088832136	6.135544028	-3.213074435	1.692945065
*c1cc(F)c(*)cc1F	*c1ccc(S)c(*)c1	0.5	0.5	block	2.359275577	6.04699427	-2.964266469	1.612364786
*c1cc(F)c(*)cc1F	*c1ccc(S)c(*)c1	0.5	0.5	random	2.183009488	6.067246972	-3.126431271	1.630794745
*c1cc(F)c(*)cc1F	*c1cc(*)cc(C(N)=S)c1	0.5	0.5	alternating	2.583554483	5.640629154	-2.757929876	1.24257253
*c1cc(F)c(*)cc1F	*c1cc(*)cc(C(N)=S)c1	0.5	0.5	block	2.610101135	5.617356306	-2.733506956	1.221394239
*c1cc(F)c(*)cc1F	*c1cc(*)cc(C(N)=S)c1	0.5	0.5	random	2.602618276	5.630868321	-2.740391186	1.233690172
*c1cc(F)c(*)cc1F	*c1cc(F)cc(*)c1O	0.5	0.5	alternating	2.310111206	6.621607201	-3.00949769	2.135262553
*c1cc(F)c(*)cc1F	*c1cc(F)cc(*)c1O	0.5	0.5	block	2.416196881	6.705767459	-2.91189887	2.211848387
*c1cc(F)c(*)cc1F	*c1cc(F)cc(*)c1O	0.5	0.5	random	2.365266461	6.658007058	-2.958754856	2.168386423
*c1cc(F)c(*)cc1F	*c1cc(C(C)(C)C)cc(*)c1O	0.5	0.5	alternating	2.069855229	6.436396931	-3.23053319	1.966721207
*c1cc(F)c(*)cc1F	*c1cc(C(C)(C)C)cc(*)c1O	0.5	0.5	block	2.303295497	6.448044641	-3.015768142	1.977320623
*c1cc(F)c(*)cc1F	*c1cc(C(C)(C)C)cc(*)c1O	0.5	0.5	random	2.22212422	6.441384496	-3.090445717	1.971259891
*c1cc(F)c(*)cc1F	*c1cnc(OCc2ccccc2)c(*)c1	0.5	0.5	alternating	2.215810206	6.393279519	-3.096254611	1.927484362
*c1cc(F)c(*)cc1F	*c1cnc(OCc2ccccc2)c(*)c1	0.5	0.5	block	2.42297234	6.322617586	-2.905665448	1.863182003
*c1cc(F)c(*)cc1F	*c1cnc(OCc2ccccc2)c(*)c1	0.5	0.5	random	2.313224888	6.37303754	-3.006633103	1.909064161
*c1cc(F)c(*)cc1F	*c1cccc(*)c1CC(=O)O	0.5	0.5	alternating	2.076040579	7.106921242	-3.224842667	2.57689833
*c1cc(F)c(*)cc1F	*c1cccc(*)c1CC(=O)O	0.5	0.5	block	2.443384019	7.075015767	-2.886886703	2.547864348
*c1cc(F)c(*)cc1F	*c1cccc(*)c1CC(=O)O	0.5	0.5	random	2.241549332	7.11214907	-3.072574614	2.581655654
*c1cc(F)c(*)cc1F	*c1cc(*)c(OCC)c(C=CC(=O)O)c1	0.5	0.5	alternating	2.844783034	6.619823482	-2.517599609	2.133639368
*c1cc(F)c(*)cc1F	*c1cc(*)c(OCC)c(C=CC(=O)O)c1	0.5	0.5	block	2.885410679	6.630332337	-2.480222175	2.143202427
*c1cc(F)c(*)cc1F	*c1cc(*)c(OCC)c(C=CC(=O)O)c1	0.5	0.5	random	2.842336935	6.606358579	-2.51985002	2.121386307
*c1cc(F)c(*)cc1F	*c1cc(F)cc(*)c1N	0.5	0.5	alternating	1.894547046	5.840140395	-3.391816718	1.424127759
*c1cc(F)c(*)cc1F	*c1cc(F)cc(*)c1N	0.5	0.5	block	2.304315395	5.779469845	-3.014829837	1.368917559
*c1cc(F)c(*)cc1F	*c1cc(F)cc(*)c1N	0.5	0.5	random	2.087480842	5.818899885	-3.214317626	1.404798896
*c1cc(F)c(*)cc1F	*c1cc(*)c2c(c1)NC(=O)C2=O	0.5	0.5	alternating	3.940812946	6.851163879	-1.50925209	2.34415913
*c1cc(F)c(*)cc1F	*c1cc(*)c2c(c1)NC(=O)C2=O	0.5	0.5	block	4.015933546	6.873446321	-1.440141138	2.364436152
*c1cc(F)c(*)cc1F	*c1cc(*)c2c(c1)NC(=O)C2=O	0.5	0.5	random	3.97122094	6.863561026	-1.481276735	2.355440533
*c1cc(F)c(*)cc1F	*c1cnc(F)c(*)c1	0.5	0.5	alternating	2.553667324	7.014940978	-2.785426062	2.49319629
*c1cc(F)c(*)cc1F	*c1cnc(F)c(*)c1	0.5	0.5	block	2.578091871	7.019059206	-2.762955478	2.496943878
*c1cc(F)c(*)cc1F	*c1cnc(F)c(*)c1	0.5	0.5	random	2.552960676	7.025818057	-2.786076178	2.503094432
*c1cc(F)c(*)cc1F	*c1cc(C(=O)OC)cc(*)n1	0.5	0.5	alternating	3.219823291	7.041144737	-2.172562572	2.517041711
*c1cc(F)c(*)cc1F	*c1cc(C(=O)OC)cc(*)n1	0.5	0.5	block	3.133593789	7.031312386	-2.251893714	2.508094271
*c1cc(F)c(*)cc1F	*c1cc(C(=O)OC)cc(*)n1	0.5	0.5	random	3.175242602	7.04309804	-2.213576806	2.518819216
*c1cc(F)c(*)cc1F	*c1cc(*)c(=O)n(C)c1C	0.5	0.5	alternating	2.320935744	6.062481939	-2.999539116	1.626458564
*c1cc(F)c(*)cc1F	*c1cc(*)c(=O)n(C)c1C	0.5	0.5	block	2.440845501	5.964215943	-2.88922214	1.537036508
*c1cc(F)c(*)cc1F	*c1cc(*)c(=O)n(C)c1C	0.5	0.5	random	2.351075849	6.034437339	-2.971810219	1.600937979
*c1cc(F)c(*)cc1F	*c1cc(*)c(N)cn1	0.5	0.5	alternating	2.120193696	5.719220144	-3.1842218	1.314090331
*c1cc(F)c(*)cc1F	*c1cc(*)c(N)cn1	0.5	0.5	block	2.303782186	5.417491033	-3.015320389	1.03951684
*c1cc(F)c(*)cc1F	*c1cc(*)c(N)cn1	0.5	0.5	random	2.174752825	5.615122856	-3.134027401	1.219361799
*c1cc(F)c(*)cc1F	*c1cc(C#N)c(*)cc1O	0.5	0.5	alternating	2.590549206	6.778836032	-2.75149473	2.278340789
*c1cc(F)c(*)cc1F	*c1cc(C#N)c(*)cc1O	0.5	0.5	block	2.620379277	6.797834955	-2.724051065	2.295629809
*c1cc(F)c(*)cc1F	*c1cc(C#N)c(*)cc1O	0.5	0.5	random	2.602541324	6.796498515	-2.740461982	2.294413648
*c1cc(F)c(*)cc1F	*c1cccc2c1sc1c(*)cccc12	0.5	0.5	alternating	2.234670618	6.200430006	-3.078903032	1.751991305
*c1cc(F)c(*)cc1F	*c1cccc2c1sc1c(*)cccc12	0.5	0.5	block	2.384418716	6.179426354	-2.941134781	1.732877982
*c1cc(F)c(*)cc1F	*c1cccc2c1sc1c(*)cccc12	0.5	0.5	random	2.314906816	6.178352143	-3.005085729	1.731900451
*c1cc(F)c(*)cc1F	*c1ccc(*)c(C(=O)OCC)c1	0.5	0.5	alternating	2.62959642	6.973918943	-2.715571294	2.455866238
*c1cc(F)c(*)cc1F	*c1ccc(*)c(C(=O)OCC)c1	0.5	0.5	block	2.649338626	6.958684601	-2.697408464	2.442002987
*c1cc(F)c(*)cc1F	*c1ccc(*)c(C(=O)OCC)c1	0.5	0.5	random	2.63225245	6.966905525	-2.713127746	2.449484028
*c1cc(F)c(*)cc1F	*c1cc(*)cc(OCC)c1	0.5	0.5	alternating	2.143693091	6.405664914	-3.162602356	1.938755072
*c1cc(F)c(*)cc1F	*c1cc(*)cc(OCC)c1	0.5	0.5	block	2.360760535	6.382248646	-2.962900308	1.917446267
*c1cc(F)c(*)cc1F	*c1cc(*)cc(OCC)c1	0.5	0.5	random	2.228868604	6.402118023	-3.084240885	1.935527401
*c1cc(F)c(*)cc1F	*c1ccc2c(c1)C(=O)C(=O)c1cc(*)ccc1-2	0.5	0.5	alternating	4.280368941	6.690201046	-1.196860574	2.197682952
*c1cc(F)c(*)cc1F	*c1ccc2c(c1)C(=O)C(=O)c1cc(*)ccc1-2	0.5	0.5	block	4.295215716	6.689967723	-1.183201541	2.197470628
*c1cc(F)c(*)cc1F	*c1ccc2c(c1)C(=O)C(=O)c1cc(*)ccc1-2	0.5	0.5	random	4.280984055	6.68635457	-1.19629467	2.194182659
*c1cc(F)c(*)cc1F	*c1sc(*)c2sc(C(=O)O)cc12	0.5	0.5	alternating	3.65238695	5.844186262	-1.774604006	1.427809499
*c1cc(F)c(*)cc1F	*c1sc(*)c2sc(C(=O)O)cc12	0.5	0.5	block	3.839649755	5.625181992	-1.602322226	1.228515613
*c1cc(F)c(*)cc1F	*c1sc(*)c2sc(C(=O)O)cc12	0.5	0.5	random	3.713352939	5.769277409	-1.718515296	1.359642442
*c1cc(F)c(*)cc1F	*c1nc2ccnc(*)c2s1	0.5	0.5	alternating	3.44459181	6.798457713	-1.965775535	2.296196519
*c1cc(F)c(*)cc1F	*c1nc2ccnc(*)c2s1	0.5	0.5	block	3.45074691	6.714826063	-1.960112842	2.220091718
*c1cc(F)c(*)cc1F	*c1nc2ccnc(*)c2s1	0.5	0.5	random	3.511086579	6.770275576	-1.904600347	2.270550774
*c1cc(F)c(*)cc1F	*c1ccnc2c1ccc1c(*)ccnc12	0.5	0.5	alternating	2.837343283	6.70772864	-2.52444418	2.213633062
*c1cc(F)c(*)cc1F	*c1ccnc2c1ccc1c(*)ccnc12	0.5	0.5	block	2.814002844	6.715637111	-2.545917384	2.220829771
*c1cc(F)c(*)cc1F	*c1ccnc2c1ccc1c(*)ccnc12	0.5	0.5	random	2.817884565	6.720290324	-2.5423462	2.225064195
*c1cc(F)c(*)cc1F	*c1cc2n[nH]c(*)c2cn1	0.5	0.5	alternating	2.881218461	6.166651331	-2.484079016	1.721252712
*c1cc(F)c(*)cc1F	*c1cc2n[nH]c(*)c2cn1	0.5	0.5	block	2.774371096	6.04855381	-2.582378592	1.613783967
*c1cc(F)c(*)cc1F	*c1cc2n[nH]c(*)c2cn1	0.5	0.5	random	2.815256213	6.122512983	-2.544764284	1.681086815
*c1cc(F)c(*)cc1F	*c1ccc(*)nn1	0.5	0.5	alternating	3.102339784	6.80052428	-2.280647399	2.298077095
*c1cc(F)c(*)cc1F	*c1ccc(*)nn1	0.5	0.5	block	3.270690911	6.751699914	-2.125764362	2.253646922
*c1cc(F)c(*)cc1F	*c1ccc(*)nn1	0.5	0.5	random	3.169746958	6.784817119	-2.218632799	2.283783578
*c1cc(F)c(*)cc1F	*c1ccc(C=O)c(*)n1	0.5	0.5	alternating	3.480277301	7.053260654	-1.932944883	2.528067195
*c1cc(F)c(*)cc1F	*c1ccc(C=O)c(*)n1	0.5	0.5	block	3.282646262	6.578099115	-2.114765439	2.095670195
*c1cc(F)c(*)cc1F	*c1ccc(C=O)c(*)n1	0.5	0.5	random	3.454387213	6.956851631	-1.956763764	2.440334984
*c1cc(F)c(*)cc1F	*c1cc(*)n2cncc2c1	0.5	0.5	alternating	2.467326539	5.578351586	-2.864859584	1.185899944
*c1cc(F)c(*)cc1F	*c1cc(*)n2cncc2c1	0.5	0.5	block	2.506729844	5.46617081	-2.828608544	1.083815437
*c1cc(F)c(*)cc1F	*c1cc(*)n2cncc2c1	0.5	0.5	random	2.488117263	5.538132129	-2.845732118	1.149300237
*c1cc(F)c(*)cc1F	*c1cc(*)cc(C(F)F)c1	0.5	0.5	alternating	2.382841138	6.951648936	-2.942586153	2.435600532
*c1cc(F)c(*)cc1F	*c1cc(*)cc(C(F)F)c1	0.5	0.5	block	2.48497252	6.954452947	-2.848625281	2.438152182
*c1cc(F)c(*)cc1F	*c1cc(*)cc(C(F)F)c1	0.5	0.5	random	2.41391703	6.956234	-2.913996333	2.43977294
*c1cc(F)c(*)cc1F	*c1cc(*)cc(C)c1	0.5	0.5	alternating	2.103982615	6.663809887	-3.199135995	2.173666997
*c1cc(F)c(*)cc1F	*c1cc(*)cc(C)c1	0.5	0.5	block	2.379809815	6.618234434	-2.94537497	2.132193335
*c1cc(F)c(*)cc1F	*c1cc(*)cc(C)c1	0.5	0.5	random	2.217881409	6.6495802	-3.094349103	2.160717982
*c1cc(F)c(*)cc1F	*c1cc(F)c(N)c(*)c1F	0.5	0.5	alternating	1.944904959	5.942639969	-3.345487437	1.517402372
*c1cc(F)c(*)cc1F	*c1cc(F)c(N)c(*)c1F	0.5	0.5	block	2.306231993	5.854507297	-3.013066566	1.437201641
*c1cc(F)c(*)cc1F	*c1cc(F)c(N)c(*)c1F	0.5	0.5	random	2.107318608	5.892345405	-3.19606688	1.471634319
*c1cc(F)c(*)cc1F	*c1ccc(*)c(C(=O)O)c1	0.5	0.5	alternating	2.680412594	7.039274233	-2.668820413	2.515339552
*c1cc(F)c(*)cc1F	*c1ccc(*)c(C(=O)O)c1	0.5	0.5	block	2.706712162	7.010116989	-2.644624811	2.48880646
*c1cc(F)c(*)cc1F	*c1ccc(*)c(C(=O)O)c1	0.5	0.5	random	2.698829145	7.016977875	-2.651877187	2.495049867
*c1cc(F)c(*)cc1F	*c1ccc2c(c1)Cc1cc(*)ccc1-2	0.5	0.5	alternating	2.438243691	6.075570401	-2.891615804	1.638369065
*c1cc(F)c(*)cc1F	*c1ccc2c(c1)Cc1cc(*)ccc1-2	0.5	0.5	block	2.482042266	5.87134412	-2.851321115	1.45252315
*c1cc(F)c(*)cc1F	*c1ccc2c(c1)Cc1cc(*)ccc1-2	0.5	0.5	random	2.460792648	5.983734606	-2.870870764	1.554798492
*c1cc(F)c(*)cc1F	*c1cnc(*)c(O)c1	0.5	0.5	alternating	2.603729394	6.543005835	-2.739368957	2.06373531
*c1cc(F)c(*)cc1F	*c1cnc(*)c(O)c1	0.5	0.5	block	2.707417042	6.358431632	-2.643976321	1.895772785
*c1cc(F)c(*)cc1F	*c1cnc(*)c(O)c1	0.5	0.5	random	2.655351485	6.455551885	-2.691876634	1.984152216
*c1cc(F)c(*)cc1F	*c1ccc(*)c2nsnc12	0.5	0.5	alternating	3.890338576	6.410491659	-1.55568851	1.943147409
*c1cc(F)c(*)cc1F	*c1ccc(*)c2nsnc12	0.5	0.5	block	3.875187402	6.230972139	-1.56962759	1.779784646
*c1cc(F)c(*)cc1F	*c1ccc(*)c2nsnc12	0.5	0.5	random	3.893412106	6.34401992	-1.552860862	1.882658127
*c1cc(F)c(*)cc1F	*c1cnc2n[nH]c(*)c2c1	0.5	0.5	alternating	2.949421817	6.212502746	-2.421331928	1.762977499
*c1cc(F)c(*)cc1F	*c1cnc2n[nH]c(*)c2c1	0.5	0.5	block	2.867157639	6.095274553	-2.497014972	1.656299843
*c1cc(F)c(*)cc1F	*c1cnc2n[nH]c(*)c2c1	0.5	0.5	random	2.898282755	6.179869716	-2.468379866	1.733281441
*c1cc(F)c(*)cc1F	*c1cc(Cl)c(N)c(*)c1F	0.5	0.5	alternating	1.995622847	5.984907427	-3.298826981	1.555865758
*c1cc(F)c(*)cc1F	*c1cc(Cl)c(N)c(*)c1F	0.5	0.5	block	2.341810896	5.912729025	-2.980333976	1.490183413
*c1cc(F)c(*)cc1F	*c1cc(Cl)c(N)c(*)c1F	0.5	0.5	random	2.137355211	5.937553293	-3.168433205	1.512773496
*c1cc(F)c(*)cc1F	*c1cc(OC)cc(*)c1C	0.5	0.5	alternating	1.820106048	6.369044537	-3.460302436	1.905430529
*c1cc(F)c(*)cc1F	*c1cc(OC)cc(*)c1C	0.5	0.5	block	2.313927979	6.370670842	-3.005986259	1.906910466
*c1cc(F)c(*)cc1F	*c1cc(OC)cc(*)c1C	0.5	0.5	random	2.03967212	6.379231097	-3.25830165	1.914700298
*c1cc(F)c(*)cc1F	*c1ccc(Cl)c(*)c1Cl	0.5	0.5	alternating	2.324842205	7.242019758	-2.995945172	2.69983798
*c1cc(F)c(*)cc1F	*c1ccc(Cl)c(*)c1Cl	0.5	0.5	block	2.538693487	7.192879733	-2.799201992	2.655120557
*c1cc(F)c(*)cc1F	*c1ccc(Cl)c(*)c1Cl	0.5	0.5	random	2.432990181	7.22043504	-2.896449034	2.680195887
*c1cc(F)c(*)cc1F	*c1cc(*)c([N+](=O)[O-])cn1	0.5	0.5	alternating	3.971459981	7.477921497	-1.481056817	2.914508562
*c1cc(F)c(*)cc1F	*c1cc(*)c([N+](=O)[O-])cn1	0.5	0.5	block	4.131490992	7.267620122	-1.333828287	2.723134311
*c1cc(F)c(*)cc1F	*c1cc(*)c([N+](=O)[O-])cn1	0.5	0.5	random	4.010330342	7.380548899	-1.445296086	2.825899498
*c1cc(F)c(*)cc1F	*c1ccc2ccc(*)nc2c1	0.5	0.5	alternating	2.907982612	6.635503495	-2.459455997	2.147908181
*c1cc(F)c(*)cc1F	*c1ccc2ccc(*)nc2c1	0.5	0.5	block	2.849580044	6.585262266	-2.513186359	2.102188662
*c1cc(F)c(*)cc1F	*c1ccc2ccc(*)nc2c1	0.5	0.5	random	2.901377903	6.615179129	-2.465532329	2.129413008
*c1cc(F)c(*)cc1F	*c1cc(*)ncn1	0.5	0.5	alternating	3.283411124	7.130807926	-2.114061766	2.598635213
*c1cc(F)c(*)cc1F	*c1cc(*)ncn1	0.5	0.5	block	3.350119243	6.977718402	-2.052690296	2.459323745
*c1cc(F)c(*)cc1F	*c1cc(*)ncn1	0.5	0.5	random	3.309465663	7.050389703	-2.09009159	2.525454629
*c1cc(F)c(*)cc1F	*c1ccc(F)c(*)n1	0.5	0.5	alternating	2.659274323	6.883967438	-2.688267623	2.374010368
*c1cc(F)c(*)cc1F	*c1ccc(F)c(*)n1	0.5	0.5	block	2.588827425	6.863290212	-2.753078769	2.355194093
*c1cc(F)c(*)cc1F	*c1ccc(F)c(*)n1	0.5	0.5	random	2.624833695	6.867638623	-2.719953	2.359151147
*c1cc(F)c(*)cc1F	*c1cnc(C#N)c(*)c1	0.5	0.5	alternating	3.138103777	7.159942385	-2.247744525	2.62514757
*c1cc(F)c(*)cc1F	*c1cnc(C#N)c(*)c1	0.5	0.5	block	3.170396483	7.121702945	-2.218035236	2.59034968
*c1cc(F)c(*)cc1F	*c1cnc(C#N)c(*)c1	0.5	0.5	random	3.152567879	7.142410866	-2.234437552	2.609193888
*c1cc(F)c(*)cc1F	*c1ccnc(*)c1C	0.5	0.5	alternating	2.218578869	7.04068739	-3.093707441	2.516625525
*c1cc(F)c(*)cc1F	*c1ccnc(*)c1C	0.5	0.5	block	2.410057413	6.826149498	-2.91754718	2.321396043
*c1cc(F)c(*)cc1F	*c1ccnc(*)c1C	0.5	0.5	random	2.307867423	6.9425531	-3.011561971	2.427323321
*c1cc(F)c(*)cc1F	*c1ccc(*)c(C=O)c1	0.5	0.5	alternating	3.001390581	6.904073015	-2.373520665	2.392306444
*c1cc(F)c(*)cc1F	*c1ccc(*)c(C=O)c1	0.5	0.5	block	2.94908581	6.912213258	-2.421641055	2.399714065
*c1cc(F)c(*)cc1F	*c1ccc(*)c(C=O)c1	0.5	0.5	random	2.983457614	6.897409808	-2.390018995	2.386242926
*c1cc(F)c(*)cc1F	*c1cn2c(Cl)cnc2c(*)n1	0.5	0.5	alternating	3.041653903	6.404776618	-2.336478409	1.937946722
*c1cc(F)c(*)cc1F	*c1cn2c(Cl)cnc2c(*)n1	0.5	0.5	block	2.83741343	6.361562295	-2.524379644	1.898621689
*c1cc(F)c(*)cc1F	*c1cn2c(Cl)cnc2c(*)n1	0.5	0.5	random	2.951266527	6.372863633	-2.419634795	1.908905906
*c1cc(F)c(*)cc1F	*c1cnc2[nH]cc(*)c2n1	0.5	0.5	alternating	2.72388222	6.029244196	-2.628828358	1.596212219
*c1cc(F)c(*)cc1F	*c1cnc2[nH]cc(*)c2n1	0.5	0.5	block	2.61841729	5.907630295	-2.725856093	1.485543569
*c1cc(F)c(*)cc1F	*c1cnc2[nH]cc(*)c2n1	0.5	0.5	random	2.693983153	6.02723539	-2.656335499	1.594384205
*c1cc(F)c(*)cc1F	*c1cc(*)c(N)c(C(F)(F)F)c1	0.5	0.5	alternating	2.034301059	5.914832272	-3.263243026	1.492097368
*c1cc(F)c(*)cc1F	*c1cc(*)c(N)c(C(F)(F)F)c1	0.5	0.5	block	2.366674126	5.804243952	-2.957459804	1.391461996
*c1cc(F)c(*)cc1F	*c1cc(*)c(N)c(C(F)(F)F)c1	0.5	0.5	random	2.190388647	5.89732565	-3.119642445	1.476166342
*c1cc(F)c(*)cc1F	*c1cc(*)cc(NC(=O)C(C)(C)C)c1	0.5	0.5	alternating	2.154018894	6.536076252	-3.153102618	2.057429389
*c1cc(F)c(*)cc1F	*c1cc(*)cc(NC(=O)C(C)(C)C)c1	0.5	0.5	block	2.399956492	6.491403826	-2.926840028	2.016777482
*c1cc(F)c(*)cc1F	*c1cc(*)cc(NC(=O)C(C)(C)C)c1	0.5	0.5	random	2.24166597	6.525369762	-3.072467307	2.047686484
*c1cc(F)c(*)cc1F	*c1ccc(N)c(*)n1	0.5	0.5	alternating	2.001987332	5.653445981	-3.292971654	1.254235843
*c1cc(F)c(*)cc1F	*c1ccc(N)c(*)n1	0.5	0.5	block	2.268141463	5.015005043	-3.048109854	0.67325459
*c1cc(F)c(*)cc1F	*c1ccc(N)c(*)n1	0.5	0.5	random	2.100291105	5.35468598	-3.202532184	0.982364242
*c1cc(F)c(*)cc1F	*c1ccc2c(-c3c(O)ccc4cc(*)ccc34)c(O)ccc2c1	0.5	0.5	alternating	2.398721918	5.860763696	-2.927975836	1.442894963
*c1cc(F)c(*)cc1F	*c1ccc2c(-c3c(O)ccc4cc(*)ccc34)c(O)ccc2c1	0.5	0.5	block	2.49062629	5.77969609	-2.843423813	1.369123442
*c1cc(F)c(*)cc1F	*c1ccc2c(-c3c(O)ccc4cc(*)ccc34)c(O)ccc2c1	0.5	0.5	random	2.433904481	5.805758442	-2.895607878	1.392840182
*c1cc(F)c(*)cc1F	*c1cccc(*)c1C(=O)OC	0.5	0.5	alternating	2.467400258	7.140094944	-2.864791763	2.607086399
*c1cc(F)c(*)cc1F	*c1cccc(*)c1C(=O)OC	0.5	0.5	block	2.678672042	7.116948467	-2.670421721	2.586023105
*c1cc(F)c(*)cc1F	*c1cccc(*)c1C(=O)OC	0.5	0.5	random	2.536787122	7.161656785	-2.800955848	2.626707674
*c1cc(F)c(*)cc1F	*c1cc2cccnc2nc1*	0.5	0.5	alternating	3.164070896	6.838708055	-2.223854775	2.33282433
*c1cc(F)c(*)cc1F	*c1cc2cccnc2nc1*	0.5	0.5	block	3.144475134	6.754217446	-2.241882877	2.255937876
*c1cc(F)c(*)cc1F	*c1cc2cccnc2nc1*	0.5	0.5	random	3.152687455	6.798467371	-2.234327541	2.296205307
*c1cc(F)c(*)cc1F	*c1ccc(CO)c(*)n1	0.5	0.5	alternating	2.490876955	6.800037914	-2.843193201	2.297634502
*c1cc(F)c(*)cc1F	*c1ccc(CO)c(*)n1	0.5	0.5	block	2.528307548	6.695852534	-2.808757056	2.202825806
*c1cc(F)c(*)cc1F	*c1ccc(CO)c(*)n1	0.5	0.5	random	2.502135275	6.770696601	-2.832835547	2.270933907
*c1cc(F)c(*)cc1F	*c1cc(C)c(Cl)c(*)c1N	0.5	0.5	alternating	1.836828963	5.890012757	-3.444917354	1.469511609
*c1cc(F)c(*)cc1F	*c1cc(C)c(Cl)c(*)c1N	0.5	0.5	block	2.304497372	5.86308989	-3.014662418	1.4450118
*c1cc(F)c(*)cc1F	*c1cc(C)c(Cl)c(*)c1N	0.5	0.5	random	2.058522308	5.882101108	-3.240959477	1.462312008
*c1cc(F)c(*)cc1F	*c1ccc2c(c1)[nH]c1cc(*)ccc12	0.5	0.5	alternating	2.181491006	5.847082566	-3.127828274	1.430445135
*c1cc(F)c(*)cc1F	*c1ccc2c(c1)[nH]c1cc(*)ccc12	0.5	0.5	block	2.329516733	5.651462485	-2.991644606	1.252430861
*c1cc(F)c(*)cc1F	*c1ccc2c(c1)[nH]c1cc(*)ccc12	0.5	0.5	random	2.261189029	5.768987791	-3.054506093	1.35937889
*c1cc(F)c(*)cc1F	*c1ccnc(*)n1	0.5	0.5	alternating	3.095289775	7.046772152	-2.287133407	2.522162659
*c1cc(F)c(*)cc1F	*c1ccnc(*)n1	0.5	0.5	block	2.99223751	6.905002642	-2.381941491	2.393152405
*c1cc(F)c(*)cc1F	*c1ccnc(*)n1	0.5	0.5	random	3.047244456	6.983791068	-2.3313351	2.464849872
*c1cc(F)c(*)cc1F	*c1ccc2nc(*)ncc2c1	0.5	0.5	alternating	3.270397436	6.631760976	-2.126034359	2.144502488
*c1cc(F)c(*)cc1F	*c1ccc2nc(*)ncc2c1	0.5	0.5	block	3.242115714	6.619201739	-2.152053543	2.133073582
*c1cc(F)c(*)cc1F	*c1ccc2nc(*)ncc2c1	0.5	0.5	random	3.249552723	6.630308371	-2.145211495	2.143180618
*c1cc(F)c(*)cc1F	*c1cc(*)c2c(c1)CCO2	0.5	0.5	alternating	2.020214007	6.082587746	-3.276203113	1.644754849
*c1cc(F)c(*)cc1F	*c1cc(*)c2c(c1)CCO2	0.5	0.5	block	2.350383587	5.913176792	-2.9724471	1.490590881
*c1cc(F)c(*)cc1F	*c1cc(*)c2c(c1)CCO2	0.5	0.5	random	2.182928647	5.997314363	-3.126505644	1.56715607
*c1cc(F)c(*)cc1F	*c1ccc(*)c(CC(=O)O)c1	0.5	0.5	alternating	2.326247368	6.883083659	-2.994652422	2.37320613
*c1cc(F)c(*)cc1F	*c1ccc(*)c(CC(=O)O)c1	0.5	0.5	block	2.439607196	6.891663615	-2.89036138	2.38101389
*c1cc(F)c(*)cc1F	*c1ccc(*)c(CC(=O)O)c1	0.5	0.5	random	2.364073374	6.881713165	-2.959852496	2.37195898
*c1cc(F)c(*)cc1F	*c1cc(*)c(Cl)c(Cl)c1N	0.5	0.5	alternating	2.186540936	6.057456816	-3.123182339	1.621885702
*c1cc(F)c(*)cc1F	*c1cc(*)c(Cl)c(Cl)c1N	0.5	0.5	block	2.412146787	6.044787161	-2.915624956	1.610356316
*c1cc(F)c(*)cc1F	*c1cc(*)c(Cl)c(Cl)c1N	0.5	0.5	random	2.286923726	6.049566125	-3.030830172	1.614705174
*c1cc(F)c(*)cc1F	*c1ccc(C(=O)OC)c(*)c1	0.5	0.5	alternating	2.797786156	7.108050865	-2.560836736	2.577926287
*c1cc(F)c(*)cc1F	*c1ccc(C(=O)OC)c(*)c1	0.5	0.5	block	2.79436134	7.091117468	-2.563987567	2.562516896
*c1cc(F)c(*)cc1F	*c1ccc(C(=O)OC)c(*)c1	0.5	0.5	random	2.796006788	7.105468953	-2.562473755	2.575576748
*c1cc(F)c(*)cc1F	*c1cc(C=O)c(*)cc1C=O	0.5	0.5	alternating	3.818268863	7.038201882	-1.621992646	2.514363713
*c1cc(F)c(*)cc1F	*c1cc(C=O)c(*)cc1C=O	0.5	0.5	block	3.864937012	7.073625939	-1.579057949	2.546599604
*c1cc(F)c(*)cc1F	*c1cc(C=O)c(*)cc1C=O	0.5	0.5	random	3.847915234	7.084789502	-1.594717985	2.556758447
*c1cc(F)c(*)cc1F	*c1cc(*)c2nc(-c3ccc(C)cc3)ccc2c1	0.5	0.5	alternating	2.862127869	6.275590529	-2.501642361	1.820387382
*c1cc(F)c(*)cc1F	*c1cc(*)c2nc(-c3ccc(C)cc3)ccc2c1	0.5	0.5	block	2.791881664	6.133572028	-2.566268869	1.691150546
*c1cc(F)c(*)cc1F	*c1cc(*)c2nc(-c3ccc(C)cc3)ccc2c1	0.5	0.5	random	2.84531467	6.207504887	-2.517110504	1.758429447
*c1cc(F)c(*)cc1F	*c1c(F)cc(F)c(*)c1F	0.5	0.5	alternating	2.49476882	7.216992738	-2.839612686	2.677063392
*c1cc(F)c(*)cc1F	*c1c(F)cc(F)c(*)c1F	0.5	0.5	block	2.550009048	7.159951427	-2.788791676	2.625155799
*c1cc(F)c(*)cc1F	*c1c(F)cc(F)c(*)c1F	0.5	0.5	random	2.508872113	7.194756066	-2.826637656	2.65682802
*c1cc(F)c(*)cc1F	*c1cc(*)c(O)c(C(=O)OC)n1	0.5	0.5	alternating	3.009537685	6.85592344	-2.36602533	2.348490331
*c1cc(F)c(*)cc1F	*c1cc(*)c(O)c(C(=O)OC)n1	0.5	0.5	block	3.040952372	6.836295836	-2.337123818	2.33062921
*c1cc(F)c(*)cc1F	*c1cc(*)c(O)c(C(=O)OC)n1	0.5	0.5	random	2.993341318	6.831506237	-2.380925988	2.326270676
*c1cc(F)c(*)cc1F	*c1ccc(*)c(C)c1	0.5	0.5	alternating	2.048794777	6.686322576	-3.249908805	2.194153544
*c1cc(F)c(*)cc1F	*c1ccc(*)c(C)c1	0.5	0.5	block	2.330814479	6.621345362	-2.990450679	2.135024279
*c1cc(F)c(*)cc1F	*c1ccc(*)c(C)c1	0.5	0.5	random	2.157764645	6.648217544	-3.149656527	2.159477965
*c1cc(F)c(*)cc1F	*c1cc(F)c(N)c(*)c1Cl	0.5	0.5	alternating	1.919056023	6.054879715	-3.369268459	1.61954054
*c1cc(F)c(*)cc1F	*c1cc(F)c(N)c(*)c1Cl	0.5	0.5	block	2.355826483	6.108956875	-2.967439636	1.668750756
*c1cc(F)c(*)cc1F	*c1cc(F)c(N)c(*)c1Cl	0.5	0.5	random	2.127357721	6.050286428	-3.177630897	1.615360649
*c1cc(F)c(*)cc1F	*c1ccc(OCc2ccccc2)c(*)c1	0.5	0.5	alternating	1.957244701	6.232195147	-3.334134875	1.780897583
*c1cc(F)c(*)cc1F	*c1ccc(OCc2ccccc2)c(*)c1	0.5	0.5	block	2.331398696	6.088785751	-2.9899132	1.650395033
*c1cc(F)c(*)cc1F	*c1ccc(OCc2ccccc2)c(*)c1	0.5	0.5	random	2.124960481	6.146435283	-3.179836358	1.702856107
*c1cc(F)c(*)cc1F	*c1ccc(NC(=O)CC#N)c(*)c1	0.5	0.5	alternating	2.272017027	6.492548194	-3.044544335	2.017818857
*c1cc(F)c(*)cc1F	*c1ccc(NC(=O)CC#N)c(*)c1	0.5	0.5	block	2.411184665	6.482352643	-2.916510108	2.008540905
*c1cc(F)c(*)cc1F	*c1ccc(NC(=O)CC#N)c(*)c1	0.5	0.5	random	2.340889723	6.448847693	-2.981181455	1.9780514
*c1cc(F)c(*)cc1F	*c1cc(NCC(=O)NN)cc(*)c1C	0.5	0.5	alternating	1.682401076	5.649444767	-3.58699101	1.250594738
*c1cc(F)c(*)cc1F	*c1cc(NCC(=O)NN)cc(*)c1C	0.5	0.5	block	2.220858669	5.553148632	-3.091610024	1.162965255
*c1cc(F)c(*)cc1F	*c1cc(NCC(=O)NN)cc(*)c1C	0.5	0.5	random	1.910005559	5.586553185	-3.377594885	1.193363398
*c1cc(F)c(*)cc1F	*c1cccc(-c2cccc(*)n2)n1	0.5	0.5	alternating	2.507376745	6.535054309	-2.828013394	2.056499421
*c1cc(F)c(*)cc1F	*c1cccc(-c2cccc(*)n2)n1	0.5	0.5	block	2.506292967	6.489582205	-2.82901047	2.015119806
*c1cc(F)c(*)cc1F	*c1cccc(-c2cccc(*)n2)n1	0.5	0.5	random	2.500894822	6.516502845	-2.833976764	2.039617589
*c1cc(F)c(*)cc1F	*c1cc(*)cc(N2CCCCC2)c1	0.5	0.5	alternating	1.834857564	5.510586367	-3.446731041	1.124233594
*c1cc(F)c(*)cc1F	*c1cc(*)cc(N2CCCCC2)c1	0.5	0.5	block	2.243407023	5.36394544	-3.070865539	0.99079035
*c1cc(F)c(*)cc1F	*c1cc(*)cc(N2CCCCC2)c1	0.5	0.5	random	2.011861665	5.449275532	-3.283887268	1.068440734
*c1cc(F)c(*)cc1F	*c1cscc1*	0.5	0.5	alternating	2.065798205	6.40956885	-3.234265652	1.942307654
*c1cc(F)c(*)cc1F	*c1cscc1*	0.5	0.5	block	2.241823683	6.392069214	-3.072322212	1.926382985
*c1cc(F)c(*)cc1F	*c1cscc1*	0.5	0.5	random	2.19587893	6.410678134	-3.114591385	1.943317102
*c1cc(F)c(*)cc1F	*c1cc(OC)c(OC)cc1*	0.5	0.5	alternating	2.161787665	5.998839521	-3.145955349	1.568543964
*c1cc(F)c(*)cc1F	*c1cc(OC)c(OC)cc1*	0.5	0.5	block	2.492223294	5.903451747	-2.84195457	1.481741089
*c1cc(F)c(*)cc1F	*c1cc(OC)c(OC)cc1*	0.5	0.5	random	2.243465361	5.960172856	-3.070811868	1.533357299
*c1cc(F)c(*)cc1F	*c1cnc2cc(*)cnc2c1	0.5	0.5	alternating	3.141572267	6.65917082	-2.244553514	2.169445446
*c1cc(F)c(*)cc1F	*c1cnc2cc(*)cnc2c1	0.5	0.5	block	3.127094972	6.622943362	-2.257872625	2.136478459
*c1cc(F)c(*)cc1F	*c1cnc2cc(*)cnc2c1	0.5	0.5	random	3.141902631	6.642565675	-2.24424958	2.154334765
*c1cc(F)c(*)cc1F	*c1cc(F)c(*)cc1F	0.5	0.5	alternating	2.694151905	6.9641026	-2.656180247	2.446933366
*c1cc(F)c(*)cc1F	*c1cc(F)c(*)cc1F	0.5	0.5	block	2.726596634	6.952366249	-2.626331096	2.436253287
*c1cc(F)c(*)cc1F	*c1cc(F)c(*)cc1F	0.5	0.5	random	2.713326937	6.956624518	-2.638539218	2.440128311
*c1cc(F)c(*)cc1F	*c1cc(C)c(N)c(*)c1[N+](=O)[O-]	0.5	0.5	alternating	3.287982316	6.133217785	-2.109856269	1.690828184
*c1cc(F)c(*)cc1F	*c1cc(C)c(N)c(*)c1[N+](=O)[O-]	0.5	0.5	block	3.396874842	6.234936592	-2.009675145	1.783392299
*c1cc(F)c(*)cc1F	*c1cc(C)c(N)c(*)c1[N+](=O)[O-]	0.5	0.5	random	3.331207134	6.174269358	-2.070089437	1.728185116
*c1cc(F)c(*)cc1F	*c1ccc(OCCOC)c(*)c1	0.5	0.5	alternating	2.013181003	6.234356362	-3.282673478	1.782864289
*c1cc(F)c(*)cc1F	*c1ccc(OCCOC)c(*)c1	0.5	0.5	block	2.364839242	6.125616013	-2.959147897	1.683910572
*c1cc(F)c(*)cc1F	*c1ccc(OCCOC)c(*)c1	0.5	0.5	random	2.178179934	6.190879671	-3.130874461	1.743300501
*c1cc(F)c(*)cc1F	*c1cnc(C)c(*)c1	0.5	0.5	alternating	2.240969084	6.790015011	-3.073108443	2.28851366
*c1cc(F)c(*)cc1F	*c1cnc(C)c(*)c1	0.5	0.5	block	2.408594309	6.764282367	-2.918893235	2.265096954
*c1cc(F)c(*)cc1F	*c1cnc(C)c(*)c1	0.5	0.5	random	2.296725957	6.791483061	-3.02181212	2.289849585
*c1cc(F)c(*)cc1F	*c1cnc(*)c(N)c1N	0.5	0.5	alternating	1.793793075	5.455828883	-3.484510371	1.074404284
*c1cc(F)c(*)cc1F	*c1cnc(*)c(N)c1N	0.5	0.5	block	2.23397382	5.077714531	-3.079544086	0.730320223
*c1cc(F)c(*)cc1F	*c1cnc(*)c(N)c1N	0.5	0.5	random	1.982392131	5.292017372	-3.31099924	0.925335808
*c1cc(F)c(*)cc1F	*c1ccc2c(c1)c(*)cn2C(=O)OC(C)(C)C	0.5	0.5	alternating	2.14008732	6.181924941	-3.165919665	1.735151696
*c1cc(F)c(*)cc1F	*c1ccc2c(c1)c(*)cn2C(=O)OC(C)(C)C	0.5	0.5	block	2.402606242	6.082763574	-2.924402257	1.644914853
*c1cc(F)c(*)cc1F	*c1ccc2c(c1)c(*)cn2C(=O)OC(C)(C)C	0.5	0.5	random	2.265716802	6.117596299	-3.050340543	1.676612632
*c1cc(F)c(*)cc1F	*c1ccc(-c2ccc(-c3ccc(*)cc3)cc2)cc1	0.5	0.5	alternating	2.461912098	6.057013774	-2.86984087	1.621482534
*c1cc(F)c(*)cc1F	*c1ccc(-c2ccc(-c3ccc(*)cc3)cc2)cc1	0.5	0.5	block	2.576686007	5.870796185	-2.764248873	1.452024528
*c1cc(F)c(*)cc1F	*c1ccc(-c2ccc(-c3ccc(*)cc3)cc2)cc1	0.5	0.5	random	2.484522144	5.998419785	-2.849039628	1.568162005
*c1cc(F)c(*)cc1F	*c1cc(C(=O)OC)[nH]c1*	0.5	0.5	alternating	2.437817625	6.240266092	-2.892007785	1.788242144
*c1cc(F)c(*)cc1F	*c1cc(C(=O)OC)[nH]c1*	0.5	0.5	block	2.497458553	6.106629927	-2.837138131	1.666633234
*c1cc(F)c(*)cc1F	*c1cc(C(=O)OC)[nH]c1*	0.5	0.5	random	2.45059193	6.176398155	-2.880255425	1.730122321
*c1cc(F)c(*)cc1F	*c1cc(*)c(OC)c(C(=O)O)c1OC	0.5	0.5	alternating	2.343992342	6.539647517	-2.978327046	2.06067924
*c1cc(F)c(*)cc1F	*c1cc(*)c(OC)c(C(=O)O)c1OC	0.5	0.5	block	2.610286146	6.647609902	-2.733336746	2.158925011
*c1cc(F)c(*)cc1F	*c1cc(*)c(OC)c(C(=O)O)c1OC	0.5	0.5	random	2.483558028	6.642303068	-2.849926614	2.154095792
*c1cc(F)c(*)cc1F	*c1cc(*)c(F)c(C#N)c1N	0.5	0.5	alternating	2.228028791	6.067164388	-3.085013512	1.630719593
*c1cc(F)c(*)cc1F	*c1cc(*)c(F)c(C#N)c1N	0.5	0.5	block	2.388882006	5.98422969	-2.937028555	1.555249018
*c1cc(F)c(*)cc1F	*c1cc(*)c(F)c(C#N)c1N	0.5	0.5	random	2.284474415	6.002462536	-3.033083538	1.571840908
*c1cc(F)c(*)cc1F	*c1cnc(N)c(*)c1OC	0.5	0.5	alternating	1.851912133	5.985608321	-3.431040838	1.556503572
*c1cc(F)c(*)cc1F	*c1cnc(N)c(*)c1OC	0.5	0.5	block	2.320158812	5.938991807	-3.000253893	1.514082544
*c1cc(F)c(*)cc1F	*c1cnc(N)c(*)c1OC	0.5	0.5	random	2.067651232	5.982584571	-3.232560867	1.55375196
*c1cc(F)c(*)cc1F	*c1cc(F)cc(*)c1OC(C)C	0.5	0.5	alternating	2.237875858	6.64448261	-3.075954211	2.156079176
*c1cc(F)c(*)cc1F	*c1cc(F)cc(*)c1OC(C)C	0.5	0.5	block	2.442850774	6.637537145	-2.887377288	2.149758802
*c1cc(F)c(*)cc1F	*c1cc(F)cc(*)c1OC(C)C	0.5	0.5	random	2.351741348	6.663470565	-2.97119796	2.173358214
*c1cc(F)c(*)cc1F	*c1ccc2n[nH]c(*)c2c1	0.5	0.5	alternating	2.677736635	5.879995178	-2.671282295	1.460395612
*c1cc(F)c(*)cc1F	*c1ccc2n[nH]c(*)c2c1	0.5	0.5	block	2.608545815	5.675343939	-2.734937851	1.274162985
*c1cc(F)c(*)cc1F	*c1ccc2n[nH]c(*)c2c1	0.5	0.5	random	2.650042317	5.80605616	-2.696761068	1.393111106
*c1cc(F)c(*)cc1F	*c1cc(*)c(C(=O)O)c(F)c1	0.5	0.5	alternating	2.962585798	7.343687992	-2.409221066	2.792356073
*c1cc(F)c(*)cc1F	*c1cc(*)c(C(=O)O)c(F)c1	0.5	0.5	block	2.953276006	7.253500181	-2.417786074	2.710285165
*c1cc(F)c(*)cc1F	*c1cc(*)c(C(=O)O)c(F)c1	0.5	0.5	random	2.93796369	7.311039954	-2.431873405	2.762646358
*c1cc(F)c(*)cc1F	*c1cn(C)cc(*)c1=O	0.5	0.5	alternating	2.231096894	6.054254331	-3.082190857	1.618971441
*c1cc(F)c(*)cc1F	*c1cn(C)cc(*)c1=O	0.5	0.5	block	2.325293082	5.789958444	-2.995530365	1.378462184
*c1cc(F)c(*)cc1F	*c1cn(C)cc(*)c1=O	0.5	0.5	random	2.291194239	5.948365807	-3.0269013	1.522612884
*c1cc(F)c(*)cc1F	*c1ccc(C)c(*)c1C	0.5	0.5	alternating	1.658714122	6.820054394	-3.608783008	2.315849499
*c1cc(F)c(*)cc1F	*c1ccc(C)c(*)c1C	0.5	0.5	block	2.304622613	6.754211159	-3.014547196	2.255932154
*c1cc(F)c(*)cc1F	*c1ccc(C)c(*)c1C	0.5	0.5	random	1.978433146	6.789034351	-3.314641506	2.28762126
*c1cc(F)c(*)cc1F	*c1cc(F)c(*)c2nsnc12	0.5	0.5	alternating	4.034947579	6.661684779	-1.422648228	2.171733149
*c1cc(F)c(*)cc1F	*c1cc(F)c(*)c2nsnc12	0.5	0.5	block	4.02654054	6.628986083	-1.430382703	2.141977335
*c1cc(F)c(*)cc1F	*c1cc(F)c(*)c2nsnc12	0.5	0.5	random	4.038483457	6.649927624	-1.419395219	2.161034138
*c1cc(F)c(*)cc1F	*c1ccc(*)c(C(F)(F)F)c1	0.5	0.5	alternating	2.458657365	7.115896385	-2.872835224	2.58506571
*c1cc(F)c(*)cc1F	*c1ccc(*)c(C(F)(F)F)c1	0.5	0.5	block	2.600982359	7.082357827	-2.74189623	2.554545623
*c1cc(F)c(*)cc1F	*c1ccc(*)c(C(F)(F)F)c1	0.5	0.5	random	2.49195976	7.130737881	-2.842197021	2.598571472
*c1cc(F)c(*)cc1F	*c1nc(*)c(C=O)s1	0.5	0.5	alternating	3.901779859	6.892238734	-1.545162529	2.381537248
*c1cc(F)c(*)cc1F	*c1nc(*)c(C=O)s1	0.5	0.5	block	4.038386846	6.927097771	-1.419484101	2.413258972
*c1cc(F)c(*)cc1F	*c1nc(*)c(C=O)s1	0.5	0.5	random	3.93013524	6.920575461	-1.519075579	2.40732367
*c1cc(F)c(*)cc1F	*c1ccnc(-c2cc(*)ccn2)c1	0.5	0.5	alternating	2.765726544	6.838129114	-2.590331579	2.332297494
*c1cc(F)c(*)cc1F	*c1ccnc(-c2cc(*)ccn2)c1	0.5	0.5	block	2.726827648	6.739856664	-2.626118564	2.242869564
*c1cc(F)c(*)cc1F	*c1ccnc(-c2cc(*)ccn2)c1	0.5	0.5	random	2.756003939	6.786832834	-2.599276376	2.285617879
*c1cc(F)c(*)cc1F	*c1cc(*)c2cccnc2c1O	0.5	0.5	alternating	2.631942536	6.142579699	-2.713412867	1.699347526
*c1cc(F)c(*)cc1F	*c1cc(*)c2cccnc2c1O	0.5	0.5	block	2.626935745	6.095466456	-2.718019115	1.656474475
*c1cc(F)c(*)cc1F	*c1cc(*)c2cccnc2c1O	0.5	0.5	random	2.627121689	6.106489582	-2.717848046	1.666505519
*c1cc(F)c(*)cc1F	*c1cc(Cl)cc(*)c1OC	0.5	0.5	alternating	2.317602698	6.655251329	-3.002605518	2.16587871
*c1cc(F)c(*)cc1F	*c1cc(Cl)cc(*)c1OC	0.5	0.5	block	2.521903562	6.747362536	-2.814648723	2.249699908
*c1cc(F)c(*)cc1F	*c1cc(Cl)cc(*)c1OC	0.5	0.5	random	2.436227326	6.727681444	-2.89347086	2.231790114
*c1cc(F)c(*)cc1F	*c1nc(*)c(Cl)nc1N	0.5	0.5	alternating	2.638556137	6.094733144	-2.707328354	1.655807161
*c1cc(F)c(*)cc1F	*c1nc(*)c(Cl)nc1N	0.5	0.5	block	2.696480806	5.712948769	-2.654037658	1.308383379
*c1cc(F)c(*)cc1F	*c1nc(*)c(Cl)nc1N	0.5	0.5	random	2.655149092	5.915657851	-2.692062835	1.492848644
*c1cc(F)c(*)cc1F	*c1sc(C)c(*)c1C	0.5	0.5	alternating	2.17396988	6.098254139	-3.13474771	1.659011267
*c1cc(F)c(*)cc1F	*c1sc(C)c(*)c1C	0.5	0.5	block	2.384937174	5.928217332	-2.9406578	1.504277772
*c1cc(F)c(*)cc1F	*c1sc(C)c(*)c1C	0.5	0.5	random	2.253843999	6.063722119	-3.061263521	1.627587128
*c1cc(F)c(*)cc1F	*c1cc(*)c(F)c(C)c1	0.5	0.5	alternating	2.250335623	6.836995217	-3.064491227	2.331265648
*c1cc(F)c(*)cc1F	*c1cc(*)c(F)c(C)c1	0.5	0.5	block	2.396054971	6.82799111	-2.930429426	2.32307191
*c1cc(F)c(*)cc1F	*c1cc(*)c(F)c(C)c1	0.5	0.5	random	2.313484816	6.831972971	-3.006393969	2.326695404
*c1cc(F)c(*)cc1F	*c1c(N)c(*)c(Cl)c(F)c1Cl	0.5	0.5	alternating	2.219578648	6.289780912	-3.092787643	1.83330063
*c1cc(F)c(*)cc1F	*c1c(N)c(*)c(Cl)c(F)c1Cl	0.5	0.5	block	2.459710255	6.440069934	-2.871866565	1.97006364
*c1cc(F)c(*)cc1F	*c1c(N)c(*)c(Cl)c(F)c1Cl	0.5	0.5	random	2.291228244	6.353100869	-3.026870015	1.89092179
*c1cc(F)c(*)cc1F	*c1cc(C(=O)Cl)c(*)cc1C(=O)Cl	0.5	0.5	alternating	4.17011213	7.639622232	-1.298296841	3.061656232
*c1cc(F)c(*)cc1F	*c1cc(C(=O)Cl)c(*)cc1C(=O)Cl	0.5	0.5	block	4.440882455	7.406451722	-1.049188142	2.849471067
*c1cc(F)c(*)cc1F	*c1cc(C(=O)Cl)c(*)cc1C(=O)Cl	0.5	0.5	random	4.283289433	7.558195587	-1.194173722	2.987557984
*c1cc(F)c(*)cc1F	*c1ccc2ccc3ccc(*)nc3c2n1	0.5	0.5	alternating	3.144380003	6.428487788	-2.241970397	1.959523887
*c1cc(F)c(*)cc1F	*c1ccc2ccc3ccc(*)nc3c2n1	0.5	0.5	block	3.030291912	6.417789977	-2.346931441	1.949788879
*c1cc(F)c(*)cc1F	*c1ccc2ccc3ccc(*)nc3c2n1	0.5	0.5	random	3.091960198	6.427524116	-2.290196618	1.958646946
*c1cc(F)c(*)cc1F	*c1cc(OC(F)F)cc(*)c1N	0.5	0.5	alternating	2.067647117	5.802752019	-3.232564652	1.390104337
*c1cc(F)c(*)cc1F	*c1cc(OC(F)F)cc(*)c1N	0.5	0.5	block	2.305510746	5.768621658	-3.013730113	1.359045708
*c1cc(F)c(*)cc1F	*c1cc(OC(F)F)cc(*)c1N	0.5	0.5	random	2.178177929	5.799958188	-3.130876305	1.387561951
*c1cc(F)c(*)cc1F	*c1cc(*)c2nc(-c3ccccc3)cc(C(=O)O)c2c1	0.5	0.5	alternating	3.470235217	6.600260118	-1.9421836	2.115836707
*c1cc(F)c(*)cc1F	*c1cc(*)c2nc(-c3ccccc3)cc(C(=O)O)c2c1	0.5	0.5	block	3.452782845	6.54164018	-1.958239783	2.062492564
*c1cc(F)c(*)cc1F	*c1cc(*)c2nc(-c3ccccc3)cc(C(=O)O)c2c1	0.5	0.5	random	3.471557392	6.56571543	-1.9409672	2.084401042
*c1cc(F)c(*)cc1F	*c1cc(CCCCCCCC)c(*)s1	0.5	0.5	alternating	2.738489364	5.972620121	-2.615389785	1.54468431
*c1cc(F)c(*)cc1F	*c1cc(CCCCCCCC)c(*)s1	0.5	0.5	block	2.692368837	5.568965458	-2.65782067	1.177358566
*c1cc(F)c(*)cc1F	*c1cc(CCCCCCCC)c(*)s1	0.5	0.5	random	2.768749326	5.777980976	-2.58755062	1.367562688
*c1cc(F)c(*)cc1F	*c1cnc(*)c(C(=O)OC)n1	0.5	0.5	alternating	3.525890245	6.963828712	-1.890980975	2.446684128
*c1cc(F)c(*)cc1F	*c1cnc(*)c(C(=O)OC)n1	0.5	0.5	block	3.665784779	6.940268837	-1.762278003	2.425244642
*c1cc(F)c(*)cc1F	*c1cnc(*)c(C(=O)OC)n1	0.5	0.5	random	3.549455993	6.947349523	-1.869300486	2.431688066
*c1cc(F)c(*)cc1F	*c1ccc(F)c(*)c1F	0.5	0.5	alternating	2.354159838	7.089291302	-2.968972949	2.560855085
*c1cc(F)c(*)cc1F	*c1ccc(F)c(*)c1F	0.5	0.5	block	2.453114599	7.064402937	-2.877934569	2.538206673
*c1cc(F)c(*)cc1F	*c1ccc(F)c(*)c1F	0.5	0.5	random	2.403047515	7.068972854	-2.923996286	2.542365297
*c1cc(F)c(*)cc1F	*c1cc([N+](=O)[O-])cc(*)c1F	0.5	0.5	alternating	3.710559231	7.470825815	-1.721085508	2.908051491
*c1cc(F)c(*)cc1F	*c1cc([N+](=O)[O-])cc(*)c1F	0.5	0.5	block	3.745398586	7.292415043	-1.689033301	2.745697689
*c1cc(F)c(*)cc1F	*c1cc([N+](=O)[O-])cc(*)c1F	0.5	0.5	random	3.724107529	7.383374701	-1.708621073	2.828470978
*c1cc(F)c(*)cc1F	*c1cccc(*)c1CN	0.5	0.5	alternating	1.593478993	6.459860154	-3.668799327	1.98807274
*c1cc(F)c(*)cc1F	*c1cccc(*)c1CN	0.5	0.5	block	2.254128637	6.393722563	-3.061001654	1.927887532
*c1cc(F)c(*)cc1F	*c1cccc(*)c1CN	0.5	0.5	random	1.89230808	6.458305608	-3.393876566	1.986658103
*c1cc(F)c(*)cc1F	*c1cc(*)c[n+]([O-])c1	0.5	0.5	alternating	2.661622296	6.707671333	-2.686107488	2.213580913
*c1cc(F)c(*)cc1F	*c1cc(*)c[n+]([O-])c1	0.5	0.5	block	2.671344179	6.771275193	-2.677163355	2.271460426
*c1cc(F)c(*)cc1F	*c1cc(*)c[n+]([O-])c1	0.5	0.5	random	2.677549001	6.738011293	-2.671454919	2.241190277
*c1cc(F)c(*)cc1F	*c1ccc(OC(C)C(=O)O)c(*)c1	0.5	0.5	alternating	2.164102611	6.397931014	-3.143825598	1.931717222
*c1cc(F)c(*)cc1F	*c1ccc(OC(C)C(=O)O)c(*)c1	0.5	0.5	block	2.426048531	6.33738874	-2.902835352	1.876623753
*c1cc(F)c(*)cc1F	*c1ccc(OC(C)C(=O)O)c(*)c1	0.5	0.5	random	2.274725088	6.352534886	-3.042052919	1.890406746
*c1cc(F)c(*)cc1F	*c1cc(OC)cc(*)n1	0.5	0.5	alternating	2.5390605	6.73079128	-2.79886434	2.234620065
*c1cc(F)c(*)cc1F	*c1cc(OC)cc(*)n1	0.5	0.5	block	2.482195984	6.707218331	-2.851179695	2.213168681
*c1cc(F)c(*)cc1F	*c1cc(OC)cc(*)n1	0.5	0.5	random	2.461891643	6.741675615	-2.869859689	2.244524809
*c1cc(F)c(*)cc1F	*c1ccc2c3ccc(*)cc3c3ccccc3c2c1	0.5	0.5	alternating	2.542171771	6.169597687	-2.796001971	1.723933895
*c1cc(F)c(*)cc1F	*c1ccc2c3ccc(*)cc3c3ccccc3c2c1	0.5	0.5	block	2.562737243	6.027440016	-2.777081736	1.594570415
*c1cc(F)c(*)cc1F	*c1ccc2c3ccc(*)cc3c3ccccc3c2c1	0.5	0.5	random	2.553059975	6.113240522	-2.785984823	1.672648875
*c1cc(F)c(*)cc1F	*c1cc(*)c(Cl)c(F)c1	0.5	0.5	alternating	2.589785541	7.055904416	-2.752197302	2.530473019
*c1cc(F)c(*)cc1F	*c1cc(*)c(Cl)c(F)c1	0.5	0.5	block	2.639145605	7.044242985	-2.706786044	2.519861116
*c1cc(F)c(*)cc1F	*c1cc(*)c(Cl)c(F)c1	0.5	0.5	random	2.607539188	7.046631076	-2.735863947	2.522034279
*c1cc(F)c(*)cc1F	*c1cc(*)cc(CC(F)(F)F)c1	0.5	0.5	alternating	2.315893195	6.883548038	-3.004178261	2.373628715
*c1cc(F)c(*)cc1F	*c1cc(*)cc(CC(F)(F)F)c1	0.5	0.5	block	2.458870859	6.890052869	-2.87263881	2.379548111
*c1cc(F)c(*)cc1F	*c1cc(*)cc(CC(F)(F)F)c1	0.5	0.5	random	2.387000732	6.888600609	-2.938759327	2.378226554
*c1cc(F)c(*)cc1F	*c1ccc(*)c2[nH]ncc12	0.5	0.5	alternating	2.557450477	6.124009759	-2.781945561	1.682448881
*c1cc(F)c(*)cc1F	*c1ccc(*)c2[nH]ncc12	0.5	0.5	block	2.572990442	5.91680647	-2.767648793	1.493893888
*c1cc(F)c(*)cc1F	*c1ccc(*)c2[nH]ncc12	0.5	0.5	random	2.567846957	6.051210068	-2.7723808	1.616201161
*c1cc(F)c(*)cc1F	O=S1(=O)C(Br)=CC=C1Br	0.5	0.5	alternating	4.039861544	6.317144122	-1.41812738	1.858201151
*c1cc(F)c(*)cc1F	O=S1(=O)C(Br)=CC=C1Br	0.5	0.5	block	4.208352683	6.273368555	-1.263115531	1.818365385
*c1cc(F)c(*)cc1F	O=S1(=O)C(Br)=CC=C1Br	0.5	0.5	random	4.029565319	6.320645009	-1.427599906	1.861386958
*c1cc(F)c(*)cc1F	*c1ccc(*)c(Cl)c1Cl	0.5	0.5	alternating	2.441943203	7.215689133	-2.888212253	2.675877111
*c1cc(F)c(*)cc1F	*c1ccc(*)c(Cl)c1Cl	0.5	0.5	block	2.506520219	7.162388091	-2.828801399	2.627373163
*c1cc(F)c(*)cc1F	*c1ccc(*)c(Cl)c1Cl	0.5	0.5	random	2.525440974	7.183030772	-2.811394304	2.646158003
*c1cc(F)c(*)cc1F	*c1cc(*)c2nc(N)sc2c1	0.5	0.5	alternating	2.046070261	5.817562784	-3.25241536	1.403582134
*c1cc(F)c(*)cc1F	*c1cc(*)c2nc(N)sc2c1	0.5	0.5	block	2.293016358	5.598931225	-3.025224951	1.204627414
*c1cc(F)c(*)cc1F	*c1cc(*)c2nc(N)sc2c1	0.5	0.5	random	2.138062668	5.73541188	-3.167782345	1.328824811
*c1cc(F)c(*)cc1F	*c1c(O)cc(O)c(*)c1C(=O)O	0.5	0.5	alternating	2.456645836	6.632309651	-2.874685831	2.145001782
*c1cc(F)c(*)cc1F	*c1c(O)cc(O)c(*)c1C(=O)O	0.5	0.5	block	2.699343718	6.742340345	-2.651403779	2.245129714
*c1cc(F)c(*)cc1F	*c1c(O)cc(O)c(*)c1C(=O)O	0.5	0.5	random	2.554823774	6.656934001	-2.784362128	2.167409941
*c1cc(F)c(*)cc1F	*c1cncc(*)c1C	0.5	0.5	alternating	2.080258941	6.844022422	-3.220961774	2.337660404
*c1cc(F)c(*)cc1F	*c1cncc(*)c1C	0.5	0.5	block	2.342249306	6.799017186	-2.979930638	2.296705639
*c1cc(F)c(*)cc1F	*c1cncc(*)c1C	0.5	0.5	random	2.200913888	6.821636477	-3.109959223	2.317289194
*c1cc(F)c(*)cc1F	*c1nc(*)c(N)cc1C	0.5	0.5	alternating	1.846163285	5.729287049	-3.436329778	1.323251215
*c1cc(F)c(*)cc1F	*c1nc(*)c(N)cc1C	0.5	0.5	block	2.228436795	5.123078217	-3.084638149	0.771601177
*c1cc(F)c(*)cc1F	*c1nc(*)c(N)cc1C	0.5	0.5	random	2.012517777	5.426791127	-3.283283645	1.047979925
*c1cc(F)c(*)cc1F	*c1cc(*)c(N)c(C)c1C	0.5	0.5	alternating	1.558952697	5.641407878	-3.700563519	1.243281169
*c1cc(F)c(*)cc1F	*c1cc(*)c(N)c(C)c1C	0.5	0.5	block	2.250450854	5.522745098	-3.064385214	1.135298039
*c1cc(F)c(*)cc1F	*c1cc(*)c(N)c(C)c1C	0.5	0.5	random	1.90772028	5.602844601	-3.379697343	1.208188587
*c1cc(F)c(*)cc1F	*c1ccnc(*)c1[N+](=O)[O-]	0.5	0.5	alternating	3.73469345	7.511804428	-1.698882026	2.945342029
*c1cc(F)c(*)cc1F	*c1ccnc(*)c1[N+](=O)[O-]	0.5	0.5	block	3.9600979	7.277147115	-1.491509932	2.731803874
*c1cc(F)c(*)cc1F	*c1ccnc(*)c1[N+](=O)[O-]	0.5	0.5	random	3.815608228	7.414560226	-1.62444043	2.856849806
*c1cc(F)c(*)cc1F	*c1cc(*)c2c(c1)C(=O)C(=O)N2	0.5	0.5	alternating	3.847588676	6.704743559	-1.595018418	2.210916639
*c1cc(F)c(*)cc1F	*c1cc(*)c2c(c1)C(=O)C(=O)N2	0.5	0.5	block	3.812712102	6.735748609	-1.627104866	2.239131234
*c1cc(F)c(*)cc1F	*c1cc(*)c2c(c1)C(=O)C(=O)N2	0.5	0.5	random	3.838002728	6.706965818	-1.60383749	2.212938894
*c1cc(F)c(*)cc1F	*c1cc(*)cc(CC#N)c1	0.5	0.5	alternating	2.272459598	6.845026633	-3.04413717	2.338574236
*c1cc(F)c(*)cc1F	*c1cc(*)cc(CC#N)c1	0.5	0.5	block	2.3937999	6.83096264	-2.932504092	2.325776003
*c1cc(F)c(*)cc1F	*c1cc(*)cc(CC#N)c1	0.5	0.5	random	2.3129705	6.84087879	-3.00686714	2.334799699
*c1cc(F)c(*)cc1F	*c1cc(*)c(N=S(C)(C)=O)c([N+](=O)[O-])c1	0.5	0.5	alternating	3.238826807	6.101201677	-2.155079337	1.661693526
*c1cc(F)c(*)cc1F	*c1cc(*)c(N=S(C)(C)=O)c([N+](=O)[O-])c1	0.5	0.5	block	3.149562684	6.023371576	-2.237202331	1.590868134
*c1cc(F)c(*)cc1F	*c1cc(*)c(N=S(C)(C)=O)c([N+](=O)[O-])c1	0.5	0.5	random	3.192518643	6.057512023	-2.197682848	1.621935941
*c1cc(F)c(*)cc1F	*c1ccc(*)c(C#N)c1	0.5	0.5	alternating	2.748817658	6.968643878	-2.605887755	2.451065929
*c1cc(F)c(*)cc1F	*c1ccc(*)c(C#N)c1	0.5	0.5	block	2.734836163	6.964674193	-2.61875073	2.447453515
*c1cc(F)c(*)cc1F	*c1ccc(*)c(C#N)c1	0.5	0.5	random	2.753073314	6.966133814	-2.601972552	2.44878177
*c1cc(F)c(*)cc1F	*c1cc(*)c(C)nc1C	0.5	0.5	alternating	2.011834001	6.786430916	-3.283912719	2.285252134
*c1cc(F)c(*)cc1F	*c1cc(*)c(C)nc1C	0.5	0.5	block	2.368023892	6.736235788	-2.95621802	2.239574568
*c1cc(F)c(*)cc1F	*c1cc(*)c(C)nc1C	0.5	0.5	random	2.153965824	6.773875663	-3.153151442	2.273826854
*c1cc(F)c(*)cc1F	*c1ccc(C(C)=O)c(*)c1	0.5	0.5	alternating	2.868552008	6.876058291	-2.495732152	2.366813045
*c1cc(F)c(*)cc1F	*c1ccc(C(C)=O)c(*)c1	0.5	0.5	block	2.83221822	6.879556935	-2.529159238	2.369996811
*c1cc(F)c(*)cc1F	*c1ccc(C(C)=O)c(*)c1	0.5	0.5	random	2.817567116	6.866031814	-2.542638253	2.35768895
*c1cc(F)c(*)cc1F	*c1ccc(C(N)=O)c(*)c1	0.5	0.5	alternating	2.362208523	6.783950675	-2.961568159	2.282995114
*c1cc(F)c(*)cc1F	*c1ccc(C(N)=O)c(*)c1	0.5	0.5	block	2.439851119	6.773303839	-2.890136971	2.273306494
*c1cc(F)c(*)cc1F	*c1ccc(C(N)=O)c(*)c1	0.5	0.5	random	2.365532858	6.78439591	-2.958509771	2.283400278
*c1cc(F)c(*)cc1F	*c1cc(*)cc(CO)c1	0.5	0.5	alternating	2.180268837	6.742659314	-3.12895267	2.245419976
*c1cc(F)c(*)cc1F	*c1cc(*)cc(CO)c1	0.5	0.5	block	2.387961986	6.733789044	-2.937874973	2.23734803
*c1cc(F)c(*)cc1F	*c1cc(*)cc(CO)c1	0.5	0.5	random	2.255227721	6.747656374	-3.059990497	2.249967301
*c1cc(F)c(*)cc1F	*c1cccc(*)c1Cl	0.5	0.5	alternating	2.055053262	7.114752583	-3.244150999	2.584024851
*c1cc(F)c(*)cc1F	*c1cccc(*)c1Cl	0.5	0.5	block	2.422128985	7.043153163	-2.906441334	2.518869378
*c1cc(F)c(*)cc1F	*c1cccc(*)c1Cl	0.5	0.5	random	2.218985014	7.085548979	-3.093333787	2.557449571
*c1cc(F)c(*)cc1F	*c1cc(S(=O)(=O)C(F)(F)F)cc(*)c1C	0.5	0.5	alternating	2.62569903	7.275163165	-2.719156892	2.72999848
*c1cc(F)c(*)cc1F	*c1cc(S(=O)(=O)C(F)(F)F)cc(*)c1C	0.5	0.5	block	2.700668702	7.164486002	-2.650184795	2.629282262
*c1cc(F)c(*)cc1F	*c1cc(S(=O)(=O)C(F)(F)F)cc(*)c1C	0.5	0.5	random	2.654134448	7.229721768	-2.692996308	2.688646809
*c1cc(F)c(*)cc1F	*c1cc(Cl)cc(*)c1O	0.5	0.5	alternating	2.344104469	6.593899153	-2.978223889	2.110048229
*c1cc(F)c(*)cc1F	*c1cc(Cl)cc(*)c1O	0.5	0.5	block	2.499926592	6.673760419	-2.834867536	2.182721981
*c1cc(F)c(*)cc1F	*c1cc(Cl)cc(*)c1O	0.5	0.5	random	2.412731763	6.639224104	-2.915086778	2.151293934
*c1cc(F)c(*)cc1F	*c1cc(CCC(=O)O)cc(*)c1O	0.5	0.5	alternating	2.225176378	6.525975847	-3.087637733	2.048238021
*c1cc(F)c(*)cc1F	*c1cc(CCC(=O)O)cc(*)c1O	0.5	0.5	block	2.40240002	6.570099981	-2.924591982	2.088390983
*c1cc(F)c(*)cc1F	*c1cc(CCC(=O)O)cc(*)c1O	0.5	0.5	random	2.304252509	6.537820762	-3.014887692	2.059016893
*c1cc(F)c(*)cc1F	*c1cc2c(s1)-c1sc(*)cc1C2=O	0.5	0.5	alternating	4.042184847	5.616651695	-1.415989941	1.220753043
*c1cc(F)c(*)cc1F	*c1cc2c(s1)-c1sc(*)cc1C2=O	0.5	0.5	block	4.032114996	5.394319439	-1.425254203	1.018430689
*c1cc(F)c(*)cc1F	*c1cc2c(s1)-c1sc(*)cc1C2=O	0.5	0.5	random	4.035797376	5.551979672	-1.421866414	1.161901501
*c1cc(F)c(*)cc1F	*c1cc(*)cc(C#N)c1	0.5	0.5	alternating	2.535837136	7.043057582	-2.801829835	2.5187824
*c1cc(F)c(*)cc1F	*c1cc(*)cc(C#N)c1	0.5	0.5	block	2.579276254	7.035838216	-2.761865847	2.512212777
*c1cc(F)c(*)cc1F	*c1cc(*)cc(C#N)c1	0.5	0.5	random	2.560819686	7.038107926	-2.778845889	2.514278213
*c1cc(F)c(*)cc1F	*c1cc(*)c(Cl)c(OC(F)(F)F)c1	0.5	0.5	alternating	2.851231601	7.187779335	-2.511666927	2.650479194
*c1cc(F)c(*)cc1F	*c1cc(*)c(Cl)c(OC(F)(F)F)c1	0.5	0.5	block	2.889569261	7.163128075	-2.47639628	2.628046548
*c1cc(F)c(*)cc1F	*c1cc(*)c(Cl)c(OC(F)(F)F)c1	0.5	0.5	random	2.87768883	7.163690782	-2.487326276	2.628558611
*c1cc(F)c(*)cc1F	*c1ccc2nc(*)ccc2c1	0.5	0.5	alternating	2.970045908	6.518835791	-2.402357765	2.04174057
*c1cc(F)c(*)cc1F	*c1ccc2nc(*)ccc2c1	0.5	0.5	block	2.945927408	6.444638848	-2.424546785	1.974221352
*c1cc(F)c(*)cc1F	*c1ccc2nc(*)ccc2c1	0.5	0.5	random	2.95473998	6.481106577	-2.416439218	2.007406985
*c1cc(F)c(*)cc1F	*c1cc(C(=O)OC)c(*)cc1C(=O)OC	0.5	0.5	alternating	3.223871267	7.317775016	-2.168838435	2.768775265
*c1cc(F)c(*)cc1F	*c1cc(C(=O)OC)c(*)cc1C(=O)OC	0.5	0.5	block	3.288912157	7.216709364	-2.109000815	2.676805522
*c1cc(F)c(*)cc1F	*c1cc(C(=O)OC)c(*)cc1C(=O)OC	0.5	0.5	random	3.240834713	7.313855411	-2.153232064	2.765208424
*c1cc(F)c(*)cc1F	*c1ccc(*)c(CO)c1	0.5	0.5	alternating	2.235812351	6.739622504	-3.077852637	2.242656479
*c1cc(F)c(*)cc1F	*c1ccc(*)c(CO)c1	0.5	0.5	block	2.370356319	6.717737108	-2.954072187	2.222740768
*c1cc(F)c(*)cc1F	*c1ccc(*)c(CO)c1	0.5	0.5	random	2.287274449	6.732019241	-3.030507506	2.235737509
*c1cc(F)c(*)cc1F	*c1cc(C)cc(*)n1	0.5	0.5	alternating	2.518343591	6.682840928	-2.817923896	2.190985244
*c1cc(F)c(*)cc1F	*c1cc(C)cc(*)n1	0.5	0.5	block	2.42343797	6.643818838	-2.905237067	2.155475142
*c1cc(F)c(*)cc1F	*c1cc(C)cc(*)n1	0.5	0.5	random	2.463158396	6.682574652	-2.868694276	2.190742933
*c1cc(F)c(*)cc1F	*c1cnc(*)c(C(=O)O)c1	0.5	0.5	alternating	3.106166759	7.107670421	-2.277126581	2.577580084
*c1cc(F)c(*)cc1F	*c1cnc(*)c(C(=O)O)c1	0.5	0.5	block	3.045978162	7.11248575	-2.332500091	2.581962032
*c1cc(F)c(*)cc1F	*c1cnc(*)c(C(=O)O)c1	0.5	0.5	random	3.092353237	7.105270159	-2.289835022	2.575395845
*c1cc(F)c(*)cc1F	*c1ccc(*)c2nonc12	0.5	0.5	alternating	3.805955308	6.568958519	-1.633321117	2.087352252
*c1cc(F)c(*)cc1F	*c1ccc(*)c2nonc12	0.5	0.5	block	3.988351904	6.460039941	-1.465516249	1.988236347
*c1cc(F)c(*)cc1F	*c1ccc(*)c2nonc12	0.5	0.5	random	3.888177784	6.523455448	-1.557676438	2.045944457
*c1cc(F)c(*)cc1F	*c1ccc(C(=O)OCC)c(*)c1	0.5	0.5	alternating	2.766533257	7.084099266	-2.589589404	2.556130332
*c1cc(F)c(*)cc1F	*c1ccc(C(=O)OCC)c(*)c1	0.5	0.5	block	2.766220669	7.068428069	-2.589876985	2.541869543
*c1cc(F)c(*)cc1F	*c1ccc(C(=O)OCC)c(*)c1	0.5	0.5	random	2.772223389	7.084818622	-2.584354482	2.556784946
*c1cc(F)c(*)cc1F	*c1cc(*)c(OC)cc1F	0.5	0.5	alternating	2.107221057	6.424321961	-3.196156628	1.955732985
*c1cc(F)c(*)cc1F	*c1cc(*)c(OC)cc1F	0.5	0.5	block	2.384207959	6.376760715	-2.941328678	1.912452251
*c1cc(F)c(*)cc1F	*c1cc(*)c(OC)cc1F	0.5	0.5	random	2.229164999	6.383897989	-3.083968201	1.91894717
*c1cc(F)c(*)cc1F	*c1cc(*)c(O)c([N+](=O)[O-])c1C	0.5	0.5	alternating	3.648830461	6.920062387	-1.777875976	2.406856772
*c1cc(F)c(*)cc1F	*c1cc(*)c(O)c([N+](=O)[O-])c1C	0.5	0.5	block	3.653855523	6.982700989	-1.773252919	2.4638579
*c1cc(F)c(*)cc1F	*c1cc(*)c(O)c([N+](=O)[O-])c1C	0.5	0.5	random	3.645605893	6.954408395	-1.780842578	2.438111639
*c1cc(F)c(*)cc1F	*c1ncc(*)n2ncnc12	0.5	0.5	alternating	3.512472243	6.648288173	-1.903325537	2.159542238
*c1cc(F)c(*)cc1F	*c1ncc(*)n2ncnc12	0.5	0.5	block	3.496956501	6.74407183	-1.917600019	2.246705365
*c1cc(F)c(*)cc1F	*c1ncc(*)n2ncnc12	0.5	0.5	random	3.481107611	6.697888181	-1.932180998	2.204678245
*c1cc(F)c(*)cc1F	*c1cnc(*)c([N+](=O)[O-])c1	0.5	0.5	alternating	3.785390004	7.27695183	-1.652241196	2.731626166
*c1cc(F)c(*)cc1F	*c1cnc(*)c([N+](=O)[O-])c1	0.5	0.5	block	3.849203994	7.223696121	-1.593532326	2.68316347
*c1cc(F)c(*)cc1F	*c1cnc(*)c([N+](=O)[O-])c1	0.5	0.5	random	3.809448249	7.263283431	-1.630107611	2.719187922
*c1cc(F)c(*)cc1F	*c1cc(F)cc(*)c1CO	0.5	0.5	alternating	1.983377418	7.190354324	-3.310092775	2.652822435
*c1cc(F)c(*)cc1F	*c1cc(F)cc(*)c1CO	0.5	0.5	block	2.447867967	7.109505372	-2.882761471	2.579249888
*c1cc(F)c(*)cc1F	*c1cc(F)cc(*)c1CO	0.5	0.5	random	2.242207267	7.131663084	-3.071969314	2.599413406
*c1cc(F)c(*)cc1F	*c1cnc2c(ccc3cc(*)cnc32)c1	0.5	0.5	alternating	2.884842159	6.585218989	-2.480745214	2.10214928
*c1cc(F)c(*)cc1F	*c1cnc2c(ccc3cc(*)cnc32)c1	0.5	0.5	block	2.872849716	6.572382664	-2.491778261	2.090468224
*c1cc(F)c(*)cc1F	*c1cnc2c(ccc3cc(*)cnc32)c1	0.5	0.5	random	2.876456535	6.583631704	-2.488459988	2.100704851
*c1cc(F)c(*)cc1F	*c1ccc(*)c(S)c1	0.5	0.5	alternating	2.164040534	6.233849848	-3.143882709	1.782403361
*c1cc(F)c(*)cc1F	*c1ccc(*)c(S)c1	0.5	0.5	block	2.377776561	6.180639333	-2.947245563	1.733981793
*c1cc(F)c(*)cc1F	*c1ccc(*)c(S)c1	0.5	0.5	random	2.269062606	6.202670096	-3.047262403	1.754029787
*c1cc(F)c(*)cc1F	*c1ccc(*)c2cnccc12	0.5	0.5	alternating	2.727657593	6.554644499	-2.625355014	2.074326494
*c1cc(F)c(*)cc1F	*c1ccc(*)c2cnccc12	0.5	0.5	block	2.6288092	6.615663776	-2.716295536	2.129854036
*c1cc(F)c(*)cc1F	*c1ccc(*)c2cnccc12	0.5	0.5	random	2.687980317	6.57771299	-2.661858108	2.095318821
*c1cc(F)c(*)cc1F	*c1cnc(N)c(*)c1C(F)(F)F	0.5	0.5	alternating	2.418350975	6.235889346	-2.909917103	1.784259305
*c1cc(F)c(*)cc1F	*c1cnc(N)c(*)c1C(F)(F)F	0.5	0.5	block	2.579081504	6.258413602	-2.762045017	1.804756378
*c1cc(F)c(*)cc1F	*c1cnc(N)c(*)c1C(F)(F)F	0.5	0.5	random	2.455508417	6.240307725	-2.875732256	1.78828003
*c1cc(F)c(*)cc1F	*c1csc(*)n1	0.5	0.5	alternating	2.941227844	6.202825226	-2.428870383	1.754170955
*c1cc(F)c(*)cc1F	*c1csc(*)n1	0.5	0.5	block	2.761961752	6.179878358	-2.593795188	1.733289306
*c1cc(F)c(*)cc1F	*c1csc(*)n1	0.5	0.5	random	2.892322459	6.208285243	-2.473863338	1.759139572
*c1cc(F)c(*)cc1F	*c1cc(*)c(OC)cc1OC	0.5	0.5	alternating	1.883003384	6.041727993	-3.402436887	1.607572474
*c1cc(F)c(*)cc1F	*c1cc(*)c(OC)cc1OC	0.5	0.5	block	2.412175172	5.911723941	-2.915598841	1.489268787
*c1cc(F)c(*)cc1F	*c1cc(*)c(OC)cc1OC	0.5	0.5	random	2.14461939	5.982878425	-3.161750162	1.554019367
*c1cc(F)c(*)cc1F	*c1cc(*)c(Cl)cn1	0.5	0.5	alternating	2.894287158	7.040054911	-2.472055814	2.516049969
*c1cc(F)c(*)cc1F	*c1cc(*)c(Cl)cn1	0.5	0.5	block	2.892269787	7.010435157	-2.473911796	2.489095993
*c1cc(F)c(*)cc1F	*c1cc(*)c(Cl)cn1	0.5	0.5	random	2.88777194	7.03934494	-2.478049816	2.515403896
*c1cc(F)c(*)cc1F	*c1cc(*)c(OCCC)c(C=O)c1	0.5	0.5	alternating	2.830568129	6.627347511	-2.530677321	2.140486235
*c1cc(F)c(*)cc1F	*c1cc(*)c(OCCC)c(C=O)c1	0.5	0.5	block	2.883868936	6.677706422	-2.481640579	2.186312844
*c1cc(F)c(*)cc1F	*c1cc(*)c(OCCC)c(C=O)c1	0.5	0.5	random	2.841852028	6.618383932	-2.520296134	2.132329378
*c1cc(F)c(*)cc1F	*c1cc(C(=O)O)cc(*)c1OC	0.5	0.5	alternating	2.572299899	6.918647371	-2.768284093	2.405569108
*c1cc(F)c(*)cc1F	*c1cc(C(=O)O)cc(*)c1OC	0.5	0.5	block	2.678786621	6.918974963	-2.670316309	2.405867217
*c1cc(F)c(*)cc1F	*c1cc(C(=O)O)cc(*)c1OC	0.5	0.5	random	2.591227203	6.914960058	-2.750870973	2.402213653
*c1cc(F)c(*)cc1F	*c1cc(C)cc(*)c1N	0.5	0.5	alternating	1.664257464	5.624911466	-3.603683133	1.228269434
*c1cc(F)c(*)cc1F	*c1cc(C)cc(*)c1N	0.5	0.5	block	2.272069515	5.455407579	-3.044496046	1.074020897
*c1cc(F)c(*)cc1F	*c1cc(C)cc(*)c1N	0.5	0.5	random	1.93379358	5.576908816	-3.355709906	1.184587022
*c1cc(F)c(*)cc1F	*c1cc(F)c(*)cc1N	0.5	0.5	alternating	2.125114152	5.80757434	-3.17969498	1.394492649
*c1cc(F)c(*)cc1F	*c1cc(F)c(*)cc1N	0.5	0.5	block	2.321422951	5.728877335	-2.999090885	1.322878375
*c1cc(F)c(*)cc1F	*c1cc(F)c(*)cc1N	0.5	0.5	random	2.19219651	5.780706628	-3.117979211	1.370043032
*c1cc(F)c(*)cc1F	*c1ccc(*)c([N+](=O)[O-])c1C	0.5	0.5	alternating	3.44790306	7.244014088	-1.962729185	2.70165282
*c1cc(F)c(*)cc1F	*c1ccc(*)c([N+](=O)[O-])c1C	0.5	0.5	block	3.508622511	7.187129071	-1.90686729	2.649887455
*c1cc(F)c(*)cc1F	*c1ccc(*)c([N+](=O)[O-])c1C	0.5	0.5	random	3.480469227	7.230019138	-1.932768311	2.688917416
*c1cc(F)c(*)cc1F	*c1cn2cc(C)nc2c(*)n1	0.5	0.5	alternating	2.767465184	6.262335431	-2.58873203	1.808325242
*c1cc(F)c(*)cc1F	*c1cn2cc(C)nc2c(*)n1	0.5	0.5	block	2.598555302	6.139622388	-2.744129122	1.696656373
*c1cc(F)c(*)cc1F	*c1cn2cc(C)nc2c(*)n1	0.5	0.5	random	2.683567027	6.207132255	-2.665918335	1.758090352
*c1cc(F)c(*)cc1F	*c1cc(*)cc(N)c1	0.5	0.5	alternating	1.844787496	5.720386086	-3.437595504	1.315151338
*c1cc(F)c(*)cc1F	*c1cc(*)cc(N)c1	0.5	0.5	block	2.265831935	5.624658668	-3.05023462	1.228039388
*c1cc(F)c(*)cc1F	*c1cc(*)cc(N)c1	0.5	0.5	random	2.034785727	5.68377773	-3.262797131	1.281837735
*c1cc(F)c(*)cc1F	*c1cccc(C(=O)O)c1*	0.5	0.5	alternating	2.597083378	7.270386078	-2.745483292	2.725651331
*c1cc(F)c(*)cc1F	*c1cccc(C(=O)O)c1*	0.5	0.5	block	2.760620591	7.188131946	-2.595029056	2.650800071
*c1cc(F)c(*)cc1F	*c1cccc(C(=O)O)c1*	0.5	0.5	random	2.66887677	7.225783442	-2.679433371	2.685062932
*c1cc(F)c(*)cc1F	*c1ccc(N(c2ccccc2)c2ccc(*)cc2)cc1	0.5	0.5	alternating	2.062917019	5.322591714	-3.236916343	0.95315846
*c1cc(F)c(*)cc1F	*c1ccc(N(c2ccccc2)c2ccc(*)cc2)cc1	0.5	0.5	block	2.319592269	5.083741074	-3.000775112	0.735804378
*c1cc(F)c(*)cc1F	*c1ccc(N(c2ccccc2)c2ccc(*)cc2)cc1	0.5	0.5	random	2.151443078	5.22094653	-3.155472369	0.860661342
*c1cc(F)c(*)cc1F	*c1cc(F)c(*)cn1	0.5	0.5	alternating	2.980136661	6.877908749	-2.393074272	2.368496962
*c1cc(F)c(*)cc1F	*c1cc(F)c(*)cn1	0.5	0.5	block	2.977462032	6.902162232	-2.39553493	2.390567631
*c1cc(F)c(*)cc1F	*c1cc(F)c(*)cn1	0.5	0.5	random	2.977690065	6.895721733	-2.39532514	2.384706777
*c1cc(F)c(*)cc1F	*c1ccc(C)cc1*	0.5	0.5	alternating	2.095727823	6.663896177	-3.206730403	2.173745521
*c1cc(F)c(*)cc1F	*c1ccc(C)cc1*	0.5	0.5	block	2.352609224	6.54879366	-2.970399514	2.069002231
*c1cc(F)c(*)cc1F	*c1ccc(C)cc1*	0.5	0.5	random	2.207049564	6.63532174	-3.104314401	2.147742784
*c1cc(F)c(*)cc1F	*c1c(N)cc(F)c(*)c1F	0.5	0.5	alternating	1.844816339	5.951125204	-3.437568968	1.525123935
*c1cc(F)c(*)cc1F	*c1c(N)cc(F)c(*)c1F	0.5	0.5	block	2.287207774	5.86174054	-3.030568848	1.443783891
*c1cc(F)c(*)cc1F	*c1c(N)cc(F)c(*)c1F	0.5	0.5	random	2.047142351	5.931105735	-3.251429037	1.506906219
*c1cc(F)c(*)cc1F	*c1cc([N+](=O)[O-])cc(*)n1	0.5	0.5	alternating	3.95962883	7.243361157	-1.491941476	2.701058653
*c1cc(F)c(*)cc1F	*c1cc([N+](=O)[O-])cc(*)n1	0.5	0.5	block	3.981212689	7.196385895	-1.472084327	2.658311164
*c1cc(F)c(*)cc1F	*c1cc([N+](=O)[O-])cc(*)n1	0.5	0.5	random	3.961230625	7.225283296	-1.490467825	2.6846078
*c1cc(F)c(*)cc1F	*c1cc(C)cc(*)c1F	0.5	0.5	alternating	2.233724421	6.882508176	-3.079773533	2.37268244
*c1cc(F)c(*)cc1F	*c1cc(C)cc(*)c1F	0.5	0.5	block	2.373148314	6.863564411	-2.951503551	2.355443614
*c1cc(F)c(*)cc1F	*c1cc(C)cc(*)c1F	0.5	0.5	random	2.279033699	6.876019403	-3.038088997	2.366777657
*c1cc(F)c(*)cc1F	*c1cc(*)c(F)c(C(=O)O)c1N	0.5	0.5	alternating	2.38448225	6.099457209	-2.94107633	1.66010606
*c1cc(F)c(*)cc1F	*c1cc(*)c(F)c(C(=O)O)c1N	0.5	0.5	block	2.507250906	6.043824658	-2.828129166	1.609480438
*c1cc(F)c(*)cc1F	*c1cc(*)c(F)c(C(=O)O)c1N	0.5	0.5	random	2.430693208	6.080195579	-2.898562249	1.642577977
*c1cc(F)c(*)cc1F	*c1cc(*)cc(N2CCCC2)c1	0.5	0.5	alternating	1.781525265	5.37763859	-3.495796756	1.003251117
*c1cc(F)c(*)cc1F	*c1cc(*)cc(N2CCCC2)c1	0.5	0.5	block	2.277648864	5.223788717	-3.039363046	0.863247733
*c1cc(F)c(*)cc1F	*c1cc(*)cc(N2CCCC2)c1	0.5	0.5	random	1.98946598	5.31673483	-3.304491298	0.947828695
*c1cc(F)c(*)cc1F	*c1ccc(OC(C)(C)C)c(*)c1	0.5	0.5	alternating	2.00447438	6.264040672	-3.290683571	1.809877012
*c1cc(F)c(*)cc1F	*c1ccc(OC(C)(C)C)c(*)c1	0.5	0.5	block	2.339521649	6.24724876	-2.982440083	1.794596371
*c1cc(F)c(*)cc1F	*c1ccc(OC(C)(C)C)c(*)c1	0.5	0.5	random	2.172808503	6.291176469	-3.135816177	1.834570587
*c1cc(F)c(*)cc1F	*c1ccc(*)c(C)c1C	0.5	0.5	alternating	1.808752247	6.779354763	-3.470747933	2.278812835
*c1cc(F)c(*)cc1F	*c1ccc(*)c(C)c1C	0.5	0.5	block	2.278810055	6.739583193	-3.038294749	2.242620706
*c1cc(F)c(*)cc1F	*c1ccc(*)c(C)c1C	0.5	0.5	random	1.999043963	6.779743051	-3.295679554	2.279166176
*c1cc(F)c(*)cc1F	*c1ccc([N+]#[C-])c(*)c1	0.5	0.5	alternating	2.570025046	6.857332387	-2.770376957	2.349772472
*c1cc(F)c(*)cc1F	*c1ccc([N+]#[C-])c(*)c1	0.5	0.5	block	2.573380081	6.846511734	-2.767290325	2.339925678
*c1cc(F)c(*)cc1F	*c1ccc([N+]#[C-])c(*)c1	0.5	0.5	random	2.611973191	6.819422942	-2.731784664	2.315274877
*c1cc(F)c(*)cc1F	*c1ccc2occ(*)c2c1	0.5	0.5	alternating	2.15742937	6.285590009	-3.149964979	1.829486909
*c1cc(F)c(*)cc1F	*c1ccc2occ(*)c2c1	0.5	0.5	block	2.371298686	6.213594755	-2.953205209	1.763971227
*c1cc(F)c(*)cc1F	*c1ccc2occ(*)c2c1	0.5	0.5	random	2.228356555	6.271093707	-3.084711969	1.816295273
*c1cc(F)c(*)cc1F	*c1cc(C(F)(F)F)c(*)cn1	0.5	0.5	alternating	2.956365255	7.12308915	-2.414943965	2.591611127
*c1cc(F)c(*)cc1F	*c1cc(C(F)(F)F)c(*)cn1	0.5	0.5	block	3.000481847	7.079547596	-2.3743567	2.551988312
*c1cc(F)c(*)cc1F	*c1cc(C(F)(F)F)c(*)cn1	0.5	0.5	random	3.000251357	7.104416692	-2.374568752	2.57461919
*c1cc(F)c(*)cc1F	*c1cc(*)c(OC)cc1C	0.5	0.5	alternating	1.869842851	6.275206913	-3.414544577	1.820038291
*c1cc(F)c(*)cc1F	*c1cc(*)c(OC)cc1C	0.5	0.5	block	2.348088816	6.207203903	-2.974558289	1.758155552
*c1cc(F)c(*)cc1F	*c1cc(*)c(OC)cc1C	0.5	0.5	random	2.100094212	6.242839869	-3.202713325	1.79058428
*c1cc(F)c(*)cc1F	*c1cccc(*)c1C#N	0.5	0.5	alternating	2.633408948	7.174587596	-2.712063768	2.638474713
*c1cc(F)c(*)cc1F	*c1cccc(*)c1C#N	0.5	0.5	block	2.740179291	7.090817906	-2.613835052	2.562244295
*c1cc(F)c(*)cc1F	*c1cccc(*)c1C#N	0.5	0.5	random	2.691458694	7.135606693	-2.658658001	2.603002091
*c1cc(F)c(*)cc1F	*c1ccc(*)c(C)n1	0.5	0.5	alternating	2.505727289	6.727289125	-2.829530894	2.231433104
*c1cc(F)c(*)cc1F	*c1ccc(*)c(C)n1	0.5	0.5	block	2.563869881	6.64300736	-2.77603971	2.154736698
*c1cc(F)c(*)cc1F	*c1ccc(*)c(C)n1	0.5	0.5	random	2.521485359	6.701599355	-2.81503347	2.208055413
*c1cc(F)c(*)cc1F	*c1cc(*)nc(C)c1	0.5	0.5	alternating	2.633369573	6.866624517	-2.712099993	2.35822831
*c1cc(F)c(*)cc1F	*c1cc(*)nc(C)c1	0.5	0.5	block	2.629599598	6.812932773	-2.71556837	2.309368824
*c1cc(F)c(*)cc1F	*c1cc(*)nc(C)c1	0.5	0.5	random	2.629994383	6.860419554	-2.715205167	2.352581794
*c1cc(F)c(*)cc1F	*c1ccc(O)c(*)c1	0.5	0.5	alternating	1.97102016	6.277297231	-3.321461453	1.821940481
*c1cc(F)c(*)cc1F	*c1ccc(O)c(*)c1	0.5	0.5	block	2.329752287	6.185548148	-2.991427896	1.738448815
*c1cc(F)c(*)cc1F	*c1ccc(O)c(*)c1	0.5	0.5	random	2.12867726	6.259965781	-3.176416921	1.80616886
*c1cc(F)c(*)cc1F	*c1cn2ccnc2c(*)n1	0.5	0.5	alternating	2.822368	6.294217869	-2.53822144	1.837338261
*c1cc(F)c(*)cc1F	*c1cn2ccnc2c(*)n1	0.5	0.5	block	2.629496468	6.197015115	-2.71566325	1.748883755
*c1cc(F)c(*)cc1F	*c1cn2ccnc2c(*)n1	0.5	0.5	random	2.777008041	6.258825759	-2.579952602	1.80513144
*c1cc(F)c(*)cc1F	*c1cc(C(=O)OC)c(*)c(C(=O)OC)c1	0.5	0.5	alternating	2.965455504	7.283652207	-2.406580937	2.737723509
*c1cc(F)c(*)cc1F	*c1cc(C(=O)OC)c(*)c(C(=O)OC)c1	0.5	0.5	block	3.029864254	7.211518692	-2.347324886	2.67208201
*c1cc(F)c(*)cc1F	*c1cc(C(=O)OC)c(*)c(C(=O)OC)c1	0.5	0.5	random	2.98246157	7.246391755	-2.390935356	2.703816497
*c1cc(F)c(*)cc1F	*c1cc(*)cc(O)c1	0.5	0.5	alternating	2.12592185	6.526817851	-3.178951898	2.049004244
*c1cc(F)c(*)cc1F	*c1cc(*)cc(O)c1	0.5	0.5	block	2.369139892	6.481910795	-2.955191299	2.008138823
*c1cc(F)c(*)cc1F	*c1cc(*)cc(O)c1	0.5	0.5	random	2.227888922	6.50044328	-3.085142192	2.025003385
*c1cc(F)c(*)cc1F	*c1nc(*)n(C2CCCCO2)n1	0.5	0.5	alternating	2.509293783	6.907566803	-2.826249719	2.395485791
*c1cc(F)c(*)cc1F	*c1nc(*)n(C2CCCCO2)n1	0.5	0.5	block	2.568011435	6.911565943	-2.772229479	2.399125008
*c1cc(F)c(*)cc1F	*c1nc(*)n(C2CCCCO2)n1	0.5	0.5	random	2.535268414	6.869641048	-2.802353059	2.360973353
*c1cc(F)c(*)cc1F	*c1ccc([N+](=O)[O-])c(*)c1F	0.5	0.5	alternating	3.840131733	7.488952024	-1.601878806	2.924546342
*c1cc(F)c(*)cc1F	*c1ccc([N+](=O)[O-])c(*)c1F	0.5	0.5	block	3.975496432	7.308957122	-1.477343282	2.760750981
*c1cc(F)c(*)cc1F	*c1ccc([N+](=O)[O-])c(*)c1F	0.5	0.5	random	3.912736633	7.403833002	-1.535082298	2.847088032
*c1cc(F)c(*)cc1F	*c1cc(*)cc(C=O)c1	0.5	0.5	alternating	2.931703511	7.002863193	-2.437632769	2.482205506
*c1cc(F)c(*)cc1F	*c1cc(*)cc(C=O)c1	0.5	0.5	block	2.917214271	6.992320495	-2.450962871	2.472611651
*c1cc(F)c(*)cc1F	*c1cc(*)cc(C=O)c1	0.5	0.5	random	2.921681864	6.994812171	-2.446852686	2.474879076
*c1cc(F)c(*)cc1F	*c1cc(*)c2nccn2c1	0.5	0.5	alternating	2.41840446	6.034706254	-2.909867897	1.601182691
*c1cc(F)c(*)cc1F	*c1cc(*)c2nccn2c1	0.5	0.5	block	2.472426851	5.904989396	-2.860167297	1.48314035
*c1cc(F)c(*)cc1F	*c1cc(*)c2nccn2c1	0.5	0.5	random	2.440069364	5.97801593	-2.889936185	1.549594497
*c1cc(F)c(*)cc1F	*c1cc2sc(*)cc2s1	0.5	0.5	alternating	3.149821607	5.581480856	-2.236964122	1.188747579
*c1cc(F)c(*)cc1F	*c1cc2sc(*)cc2s1	0.5	0.5	block	2.950049289	5.269690134	-2.420754654	0.905018022
*c1cc(F)c(*)cc1F	*c1cc2sc(*)cc2s1	0.5	0.5	random	3.065473896	5.490337126	-2.314564016	1.105806785
*c1cc(F)c(*)cc1F	*c1ccc(C=O)c(*)c1	0.5	0.5	alternating	3.169496827	6.980289442	-2.218862919	2.461663392
*c1cc(F)c(*)cc1F	*c1ccc(C=O)c(*)c1	0.5	0.5	block	3.123888559	6.991777667	-2.260822526	2.472117677
*c1cc(F)c(*)cc1F	*c1ccc(C=O)c(*)c1	0.5	0.5	random	3.154023399	6.994924566	-2.233098473	2.474981355
*c1cc(F)c(*)cc1F	*c1ccsc1*	0.5	0.5	alternating	2.528722151	6.234895706	-2.808375621	1.783355092
*c1cc(F)c(*)cc1F	*c1ccsc1*	0.5	0.5	block	2.527302149	6.105477999	-2.809682023	1.665584979
*c1cc(F)c(*)cc1F	*c1ccsc1*	0.5	0.5	random	2.52640975	6.146529606	-2.81050303	1.702941941
*c1cc(F)c(*)cc1F	*c1cc(*)c(Cl)nc1N	0.5	0.5	alternating	2.170322375	6.028056416	-3.138103415	1.595131339
*c1cc(F)c(*)cc1F	*c1cc(*)c(Cl)nc1N	0.5	0.5	block	2.383429105	5.953230117	-2.942045224	1.527039406
*c1cc(F)c(*)cc1F	*c1cc(*)c(Cl)nc1N	0.5	0.5	random	2.255707435	5.99240108	-3.05954916	1.562684983
*c1cc(F)c(*)cc1F	*c1cc(*)nc(C(=O)OC)c1	0.5	0.5	alternating	3.090128984	7.249996589	-2.291881335	2.707096896
*c1cc(F)c(*)cc1F	*c1cc(*)nc(C(=O)OC)c1	0.5	0.5	block	3.118019175	7.14156579	-2.266222359	2.608424869
*c1cc(F)c(*)cc1F	*c1cc(*)nc(C(=O)OC)c1	0.5	0.5	random	3.108215717	7.206326739	-2.27524154	2.667357332
*c1cc(F)c(*)cc1F	*c1cc(*)c(C)c(C)c1	0.5	0.5	alternating	1.963605821	6.608841899	-3.328282644	2.123646128
*c1cc(F)c(*)cc1F	*c1cc(*)c(C)c(C)c1	0.5	0.5	block	2.334280053	6.557082104	-2.987262351	2.076544714
*c1cc(F)c(*)cc1F	*c1cc(*)c(C)c(C)c1	0.5	0.5	random	2.103944055	6.603616772	-3.199171469	2.118891263
*c1cc(F)c(*)cc1F	*c1cc(F)cc(*)c1F	0.5	0.5	alternating	2.490209575	7.13658842	-2.843807191	2.603895462
*c1cc(F)c(*)cc1F	*c1cc(F)cc(*)c1F	0.5	0.5	block	2.548530063	7.090355846	-2.790152342	2.56182382
*c1cc(F)c(*)cc1F	*c1cc(F)cc(*)c1F	0.5	0.5	random	2.508549747	7.117207336	-2.826934233	2.586258676
*c1cc(F)c(*)cc1F	*c1c2c(c(*)c3nsnc13)N=S=N2	0.5	0.5	alternating	4.736178203	6.184679662	-0.777516053	1.737658493
*c1cc(F)c(*)cc1F	*c1c2c(c(*)c3nsnc13)N=S=N2	0.5	0.5	block	4.70460208	6.037388662	-0.806566086	1.603623683
*c1cc(F)c(*)cc1F	*c1c2c(c(*)c3nsnc13)N=S=N2	0.5	0.5	random	4.733027374	6.12099903	-0.780414816	1.679709117
*c1cc(F)c(*)cc1F	*c1nn(C)c(*)c1C(=O)OCC	0.5	0.5	alternating	2.392262629	7.125462351	-2.933918381	2.593770739
*c1cc(F)c(*)cc1F	*c1nn(C)c(*)c1C(=O)OCC	0.5	0.5	block	2.545625486	7.068241005	-2.792824553	2.541699315
*c1cc(F)c(*)cc1F	*c1nn(C)c(*)c1C(=O)OCC	0.5	0.5	random	2.483477453	7.09628716	-2.850000743	2.567221315
*c1cc(F)c(*)cc1F	*c1cccc(*)[n+]1[O-]	0.5	0.5	alternating	2.659486177	6.641792693	-2.688072717	2.15363135
*c1cc(F)c(*)cc1F	*c1cccc(*)[n+]1[O-]	0.5	0.5	block	2.64215298	6.725799891	-2.704019258	2.2300779
*c1cc(F)c(*)cc1F	*c1cccc(*)[n+]1[O-]	0.5	0.5	random	2.642323471	6.691590739	-2.703862407	2.198947573
*c1cc(F)c(*)cc1F	*c1cc(*)cc(N2CCOCC2)c1	0.5	0.5	alternating	1.904530796	5.640463093	-3.382631668	1.242421415
*c1cc(F)c(*)cc1F	*c1cc(*)cc(N2CCOCC2)c1	0.5	0.5	block	2.232383107	5.64481783	-3.081007541	1.246384226
*c1cc(F)c(*)cc1F	*c1cc(*)cc(N2CCOCC2)c1	0.5	0.5	random	2.047193151	5.591117818	-3.251382301	1.197517214
*c1cc(F)c(*)cc1F	*c1cnc2c(*)cc([N+](=O)[O-])cc2c1	0.5	0.5	alternating	3.817055376	6.987975773	-1.623109054	2.468657953
*c1cc(F)c(*)cc1F	*c1cnc2c(*)cc([N+](=O)[O-])cc2c1	0.5	0.5	block	3.803762943	6.974249419	-1.635338092	2.456166971
*c1cc(F)c(*)cc1F	*c1cnc2c(*)cc([N+](=O)[O-])cc2c1	0.5	0.5	random	3.810299212	6.978150685	-1.629324725	2.459717124
*c1cc(F)c(*)cc1F	*c1ccc(*)c(C(C)C)c1	0.5	0.5	alternating	2.015495208	6.773470446	-3.280544409	2.273458106
*c1cc(F)c(*)cc1F	*c1ccc(*)c(C(C)C)c1	0.5	0.5	block	2.332842828	6.70722387	-2.988584598	2.213173722
*c1cc(F)c(*)cc1F	*c1ccc(*)c(C(C)C)c1	0.5	0.5	random	2.135187807	6.77810862	-3.170427218	2.277678845
*c1cc(F)c(*)cc1F	*c1ccnc2c(*)cccc12	0.5	0.5	alternating	2.809958297	6.568893969	-2.549638367	2.087293512
*c1cc(F)c(*)cc1F	*c1ccnc2c(*)cccc12	0.5	0.5	block	2.708587761	6.545324397	-2.64289926	2.065845201
*c1cc(F)c(*)cc1F	*c1ccnc2c(*)cccc12	0.5	0.5	random	2.769972145	6.536772012	-2.586425626	2.058062531
*c1cc(F)c(*)cc1F	*c1cc(CC(N)C(=O)OC)cc(*)c1O	0.5	0.5	alternating	2.141754856	6.383984688	-3.164385533	1.919026066
*c1cc(F)c(*)cc1F	*c1cc(CC(N)C(=O)OC)cc(*)c1O	0.5	0.5	block	2.451242194	6.394285982	-2.879657181	1.928400244
*c1cc(F)c(*)cc1F	*c1cc(CC(N)C(=O)OC)cc(*)c1O	0.5	0.5	random	2.268324352	6.3715322	-3.047941596	1.907694302
*c1cc(F)c(*)cc1F	*c1cc(*)c2[nH]ncc2c1	0.5	0.5	alternating	2.250215757	6.141919754	-3.064601504	1.698746976
*c1cc(F)c(*)cc1F	*c1cc(*)c2[nH]ncc2c1	0.5	0.5	block	2.381892928	5.996030862	-2.943458507	1.565988085
*c1cc(F)c(*)cc1F	*c1cc(*)c2[nH]ncc2c1	0.5	0.5	random	2.304224958	6.086793593	-3.014913039	1.64858217
*c1cc(F)c(*)cc1F	*c1cc(C(C)(C)C)cc(*)c1Cl	0.5	0.5	alternating	2.133228751	7.018148797	-3.172229549	2.496115405
*c1cc(F)c(*)cc1F	*c1cc(C(C)(C)C)cc(*)c1Cl	0.5	0.5	block	2.402911578	6.981036817	-2.924121348	2.462343503
*c1cc(F)c(*)cc1F	*c1cc(C(C)(C)C)cc(*)c1Cl	0.5	0.5	random	2.27720526	7.002418114	-3.039771161	2.481800484
*c1cc(F)c(*)cc1F	*c1cccc(*)c1C(=O)O	0.5	0.5	alternating	2.533705311	7.199899067	-2.803791114	2.661508151
*c1cc(F)c(*)cc1F	*c1cccc(*)c1C(=O)O	0.5	0.5	block	2.628212501	7.13440598	-2.716844499	2.601909441
*c1cc(F)c(*)cc1F	*c1cccc(*)c1C(=O)O	0.5	0.5	random	2.580250675	7.17162188	-2.760969379	2.63577591
*c1cc(F)c(*)cc1F	*c1cc(C=CC(=O)O)cc(*)c1OCC(=O)OC	0.5	0.5	alternating	2.877109359	6.717050602	-2.487859389	2.222116048
*c1cc(F)c(*)cc1F	*c1cc(C=CC(=O)O)cc(*)c1OCC(=O)OC	0.5	0.5	block	3.089629557	6.848480958	-2.292340808	2.341717672
*c1cc(F)c(*)cc1F	*c1cc(C=CC(=O)O)cc(*)c1OCC(=O)OC	0.5	0.5	random	2.960785252	6.788129912	-2.410877568	2.28679822
*c1cc(F)c(*)cc1F	*c1ccc(*)c(NN)c1	0.5	0.5	alternating	1.932473189	5.653284257	-3.356924666	1.254088674
*c1cc(F)c(*)cc1F	*c1ccc(*)c(NN)c1	0.5	0.5	block	2.26337604	5.479815637	-3.052494043	1.096232229
*c1cc(F)c(*)cc1F	*c1ccc(*)c(NN)c1	0.5	0.5	random	2.063114971	5.576240743	-3.236734227	1.183979076
*c1cc(F)c(*)cc1F	*c1cc(Cl)c(*)cc1Cl	0.5	0.5	alternating	2.688538763	7.045841584	-2.661344338	2.521315842
*c1cc(F)c(*)cc1F	*c1cc(Cl)c(*)cc1Cl	0.5	0.5	block	2.594914717	7.081740013	-2.74747846	2.553983412
*c1cc(F)c(*)cc1F	*c1cc(Cl)c(*)cc1Cl	0.5	0.5	random	2.562928085	7.092227677	-2.776906162	2.563527186
*c1cc(F)c(*)cc1F	*c1ccc(OC)c(*)c1	0.5	0.5	alternating	1.988918647	6.22745788	-3.304994845	1.776586671
*c1cc(F)c(*)cc1F	*c1ccc(OC)c(*)c1	0.5	0.5	block	2.346345831	6.103070715	-2.976161836	1.663394351
*c1cc(F)c(*)cc1F	*c1ccc(OC)c(*)c1	0.5	0.5	random	2.153929006	6.194850969	-3.153185314	1.746914382
*c1cc(F)c(*)cc1F	O=C1C=C(Br)C(=O)C=C1Br	0.5	0.5	alternating	5.034883231	7.472065649	-0.502707428	2.909179741
*c1cc(F)c(*)cc1F	O=C1C=C(Br)C(=O)C=C1Br	0.5	0.5	block	5.25897842	7.210394942	-0.296539854	2.671059398
*c1cc(F)c(*)cc1F	O=C1C=C(Br)C(=O)C=C1Br	0.5	0.5	random	5.129379747	7.331804374	-0.415770632	2.78154198
*c1cc(F)c(*)cc1F	*c1ccc2c(c1)C(=O)c1ccc(*)cc1C2=O	0.5	0.5	alternating	4.259273048	7.064607275	-1.216268795	2.53839262
*c1cc(F)c(*)cc1F	*c1ccc2c(c1)C(=O)c1ccc(*)cc1C2=O	0.5	0.5	block	4.30002082	7.003490966	-1.178780845	2.482776779
*c1cc(F)c(*)cc1F	*c1ccc2c(c1)C(=O)c1ccc(*)cc1C2=O	0.5	0.5	random	4.280529824	7.041186856	-1.196712561	2.517080039
*c1cc(F)c(*)cc1F	*c1cc(*)c(OC)c(F)c1F	0.5	0.5	alternating	2.323516945	6.632212621	-2.99716441	2.144913485
*c1cc(F)c(*)cc1F	*c1cc(*)c(OC)c(F)c1F	0.5	0.5	block	2.46868097	6.655748296	-2.863613508	2.166330949
*c1cc(F)c(*)cc1F	*c1cc(*)c(OC)c(F)c1F	0.5	0.5	random	2.411667394	6.615871342	-2.916065997	2.130042921
*c1cc(F)c(*)cc1F	*c1cc(C(=O)O)c(*)cn1	0.5	0.5	alternating	3.221829933	7.049897502	-2.170716462	2.525006727
*c1cc(F)c(*)cc1F	*c1cc(C(=O)O)c(*)cn1	0.5	0.5	block	3.226375566	7.040799602	-2.166534479	2.516727638
*c1cc(F)c(*)cc1F	*c1cc(C(=O)O)c(*)cn1	0.5	0.5	random	3.230732715	7.050390961	-2.162525902	2.525455774
*c1cc(F)c(*)cc1F	*c1cc(*)c2cccnc2c1	0.5	0.5	alternating	2.759743877	6.634134771	-2.595835634	2.146662642
*c1cc(F)c(*)cc1F	*c1cc(*)c2cccnc2c1	0.5	0.5	block	2.729563707	6.623560852	-2.623601389	2.137040375
*c1cc(F)c(*)cc1F	*c1cc(*)c2cccnc2c1	0.5	0.5	random	2.748709004	6.632463062	-2.605987716	2.145141386
*c1cc(F)c(*)cc1F	*c1cc(*)c(OC)c(C(=O)O)c1	0.5	0.5	alternating	2.521234985	6.742302669	-2.815263814	2.245095429
*c1cc(F)c(*)cc1F	*c1cc(*)c(OC)c(C(=O)O)c1	0.5	0.5	block	2.62950008	6.778978907	-2.715659926	2.278470806
*c1cc(F)c(*)cc1F	*c1cc(*)c(OC)c(C(=O)O)c1	0.5	0.5	random	2.571071234	6.747168212	-2.769414465	2.249523073
*c1cc(F)c(*)cc1F	*c1cnc(*)c(C#N)c1	0.5	0.5	alternating	3.075265661	7.092232421	-2.305555592	2.563531504
*c1cc(F)c(*)cc1F	*c1cnc(*)c(C#N)c1	0.5	0.5	block	3.250292285	7.050552684	-2.144531097	2.525602943
*c1cc(F)c(*)cc1F	*c1cnc(*)c(C#N)c1	0.5	0.5	random	3.161275943	7.077637416	-2.226426132	2.550250049
*c1cc(F)c(*)cc1F	*c1cnc(*)c(C(C)=O)n1	0.5	0.5	alternating	3.456513116	6.689027102	-1.954807933	2.196614663
*c1cc(F)c(*)cc1F	*c1cnc(*)c(C(C)=O)n1	0.5	0.5	block	3.42273113	6.719224173	-1.98588736	2.224093998
*c1cc(F)c(*)cc1F	*c1cnc(*)c(C(C)=O)n1	0.5	0.5	random	3.434764671	6.694914685	-1.974816503	2.201972363
*c1cc(F)c(*)cc1F	*c1ccc(N)c(*)c1F	0.5	0.5	alternating	1.743897799	5.773193959	-3.530414025	1.363206503
*c1cc(F)c(*)cc1F	*c1ccc(N)c(*)c1F	0.5	0.5	block	2.269576458	5.618747243	-3.046789659	1.222659991
*c1cc(F)c(*)cc1F	*c1ccc(N)c(*)c1F	0.5	0.5	random	1.970937343	5.718918432	-3.321537645	1.313815773
*c1cc(F)c(*)cc1F	*c1cc(F)cc(*)c1[N+]#[C-]	0.5	0.5	alternating	2.529203898	7.161087825	-2.807932414	2.626189921
*c1cc(F)c(*)cc1F	*c1cc(F)cc(*)c1[N+]#[C-]	0.5	0.5	block	2.534558248	7.142251542	-2.803006412	2.609048904
*c1cc(F)c(*)cc1F	*c1cc(F)cc(*)c1[N+]#[C-]	0.5	0.5	random	2.557010341	7.137971141	-2.782350486	2.605153738
*c1cc(F)c(*)cc1F	*c1ccc2cccc(*)c2n1	0.5	0.5	alternating	2.977627645	6.472996708	-2.395382566	2.000027004
*c1cc(F)c(*)cc1F	*c1ccc2cccc(*)c2n1	0.5	0.5	block	2.875653994	6.393930189	-2.489198325	1.928076472
*c1cc(F)c(*)cc1F	*c1ccc2cccc(*)c2n1	0.5	0.5	random	2.922325106	6.411897102	-2.446260903	1.944426363
*c1cc(F)c(*)cc1F	*c1cccc(*)c1F	0.5	0.5	alternating	2.254803951	6.927467846	-3.060380365	2.41359574
*c1cc(F)c(*)cc1F	*c1cccc(*)c1F	0.5	0.5	block	2.395039917	6.915307056	-2.931363277	2.402529421
*c1cc(F)c(*)cc1F	*c1cccc(*)c1F	0.5	0.5	random	2.307103583	6.931477199	-3.012264704	2.417244251
*c1cc(F)c(*)cc1F	*c1c2ccccc2c(*)c2nsnc12	0.5	0.5	alternating	4.080615362	6.051841538	-1.380633867	1.616775799
*c1cc(F)c(*)cc1F	*c1c2ccccc2c(*)c2nsnc12	0.5	0.5	block	3.919656402	6.114035517	-1.528716111	1.673372321
*c1cc(F)c(*)cc1F	*c1c2ccccc2c(*)c2nsnc12	0.5	0.5	random	4.015987883	6.110669564	-1.440091148	1.670309303
*c1cc(F)c(*)cc1F	*c1c[nH]c(=O)c(*)n1	0.5	0.5	alternating	3.030464257	6.244913404	-2.346772883	1.792471197
*c1cc(F)c(*)cc1F	*c1c[nH]c(=O)c(*)n1	0.5	0.5	block	2.83737388	6.146115915	-2.52441603	1.702565482
*c1cc(F)c(*)cc1F	*c1c[nH]c(=O)c(*)n1	0.5	0.5	random	2.952301952	6.22691449	-2.418682204	1.776092186
*c1cc(F)c(*)cc1F	*c1cc(*)c(C#N)c(F)c1	0.5	0.5	alternating	3.074350148	7.285920409	-2.306397864	2.739787572
*c1cc(F)c(*)cc1F	*c1cc(*)c(C#N)c(F)c1	0.5	0.5	block	3.119589602	7.209308538	-2.264777566	2.670070769
*c1cc(F)c(*)cc1F	*c1cc(*)c(C#N)c(F)c1	0.5	0.5	random	3.096439626	7.237713715	-2.286075544	2.69591948
*c1cc(F)c(*)cc1F	*c1ccc(C)c(*)c1	0.5	0.5	alternating	1.969743851	6.65440046	-3.322635657	2.165104418
*c1cc(F)c(*)cc1F	*c1ccc(C)c(*)c1	0.5	0.5	block	2.320500028	6.615922376	-2.999939975	2.130089363
*c1cc(F)c(*)cc1F	*c1ccc(C)c(*)c1	0.5	0.5	random	2.097026787	6.668591003	-3.205535356	2.178017813
*c1cc(F)c(*)cc1F	*c1cc(*)c(N)cc1C	0.5	0.5	alternating	1.561260038	5.606678019	-3.698440765	1.211676997
*c1cc(F)c(*)cc1F	*c1cc(*)c(N)cc1C	0.5	0.5	block	2.23927855	5.466798029	-3.074663734	1.084386206
*c1cc(F)c(*)cc1F	*c1cc(*)c(N)cc1C	0.5	0.5	random	1.871399651	5.545358022	-3.413112321	1.1558758
*c1cc(F)c(*)cc1F	*c1ccc(C(=O)O)c(*)c1	0.5	0.5	alternating	2.860104036	7.14521699	-2.503504287	2.611747461
*c1cc(F)c(*)cc1F	*c1ccc(C(=O)O)c(*)c1	0.5	0.5	block	2.840911885	7.114309842	-2.521161066	2.583621956
*c1cc(F)c(*)cc1F	*c1ccc(C(=O)O)c(*)c1	0.5	0.5	random	2.839789119	7.127473064	-2.522194011	2.595600489
*c1cc(F)c(*)cc1F	*c1cnc(Cl)c(*)c1N	0.5	0.5	alternating	2.034951194	6.39175959	-3.262644901	1.926101227
*c1cc(F)c(*)cc1F	*c1cnc(Cl)c(*)c1N	0.5	0.5	block	2.327859813	6.394652666	-2.993168972	1.928733926
*c1cc(F)c(*)cc1F	*c1cnc(Cl)c(*)c1N	0.5	0.5	random	2.165630239	6.388957564	-3.14242018	1.923551383
*c1cc(F)c(*)cc1F	*c1cc(F)c(*)c(Cl)c1	0.5	0.5	alternating	2.498604991	7.186121075	-2.836083408	2.648970178
*c1cc(F)c(*)cc1F	*c1cc(F)c(*)c(Cl)c1	0.5	0.5	block	2.648755584	7.089366819	-2.697944862	2.560923805
*c1cc(F)c(*)cc1F	*c1cc(F)c(*)c(Cl)c1	0.5	0.5	random	2.600560142	7.127758829	-2.74228467	2.595860534
*c1cc(F)c(*)cc1F	*c1cc(*)c(=O)[nH]c1C	0.5	0.5	alternating	2.332770327	6.082767885	-2.988651299	1.644918775
*c1cc(F)c(*)cc1F	*c1cc(*)c(=O)[nH]c1C	0.5	0.5	block	2.439344576	5.951711066	-2.89060299	1.52565707
*c1cc(F)c(*)cc1F	*c1cc(*)c(=O)[nH]c1C	0.5	0.5	random	2.37423507	6.044912146	-2.950503736	1.610470053
*c1cc(F)c(*)cc1F	*c1cc(CC)cc(*)c1N	0.5	0.5	alternating	1.662654159	5.655347427	-3.605158174	1.255966159
*c1cc(F)c(*)cc1F	*c1cc(CC)cc(*)c1N	0.5	0.5	block	2.302705204	5.551665394	-3.016311212	1.161615509
*c1cc(F)c(*)cc1F	*c1cc(CC)cc(*)c1N	0.5	0.5	random	1.926950492	5.607426755	-3.362005548	1.212358347
*c1cc(F)c(*)cc1F	*c1ccnc(*)c1C=O	0.5	0.5	alternating	3.267040283	7.042125254	-2.129122939	2.517933981
*c1cc(F)c(*)cc1F	*c1ccnc(*)c1C=O	0.5	0.5	block	3.291060916	6.841713998	-2.107023957	2.335559738
*c1cc(F)c(*)cc1F	*c1ccnc(*)c1C=O	0.5	0.5	random	3.284620192	6.989318873	-2.112949423	2.469880174
*c1cc(F)c(*)cc1F	*c1nc(*)n(Cc2ccccc2)n1	0.5	0.5	alternating	2.37027402	6.777078679	-2.954147902	2.276741598
*c1cc(F)c(*)cc1F	*c1nc(*)n(Cc2ccccc2)n1	0.5	0.5	block	2.491708462	6.746950426	-2.842428215	2.249324888
*c1cc(F)c(*)cc1F	*c1nc(*)n(Cc2ccccc2)n1	0.5	0.5	random	2.444532881	6.734513129	-2.88582975	2.238006948
*c1cc(F)c(*)cc1F	*c1ccc(C(=O)O)c(*)c1OC(F)F	0.5	0.5	alternating	3.07529825	7.47075121	-2.30552561	2.907983601
*c1cc(F)c(*)cc1F	*c1ccc(C(=O)O)c(*)c1OC(F)F	0.5	0.5	block	3.150014855	7.290043053	-2.236786333	2.743539178
*c1cc(F)c(*)cc1F	*c1ccc(C(=O)O)c(*)c1OC(F)F	0.5	0.5	random	3.106970891	7.389617305	-2.27638678	2.834151747
*c1cc(F)c(*)cc1F	*c1cc(C(=O)O)cc(*)c1N	0.5	0.5	alternating	2.091393746	6.119257895	-3.210717754	1.678124685
*c1cc(F)c(*)cc1F	*c1cc(C(=O)O)cc(*)c1N	0.5	0.5	block	2.387796426	6.123517565	-2.938027288	1.682000985
*c1cc(F)c(*)cc1F	*c1cc(C(=O)O)cc(*)c1N	0.5	0.5	random	2.229954796	6.116856109	-3.083241587	1.67593906
*c1cc(F)c(*)cc1F	*c1ccc(*)c(N)c1N	0.5	0.5	alternating	1.58744053	5.198101774	-3.674354712	0.839872614
*c1cc(F)c(*)cc1F	*c1ccc(*)c(N)c1N	0.5	0.5	block	2.184348978	5.054271456	-3.12519894	0.708987025
*c1cc(F)c(*)cc1F	*c1ccc(*)c(N)c1N	0.5	0.5	random	1.824999641	5.160288502	-3.455800331	0.805462537
*c1cc(F)c(*)cc1F	*c1cc(*)c(OC)c(C(=O)OC)n1	0.5	0.5	alternating	2.887510793	6.792500752	-2.47829007	2.290775684
*c1cc(F)c(*)cc1F	*c1cc(*)c(OC)c(C(=O)OC)n1	0.5	0.5	block	2.888528612	6.835816068	-2.477353677	2.330192622
*c1cc(F)c(*)cc1F	*c1cc(*)c(OC)c(C(=O)OC)n1	0.5	0.5	random	2.889278197	6.824456927	-2.476664059	2.319855804
*c1cc(F)c(*)cc1F	*c1cc(CC)c(*)c(CC)c1	0.5	0.5	alternating	1.96871331	6.79129752	-3.323583755	2.289680743
*c1cc(F)c(*)cc1F	*c1cc(CC)c(*)c(CC)c1	0.5	0.5	block	2.334023756	6.700797398	-2.987498145	2.207325632
*c1cc(F)c(*)cc1F	*c1cc(CC)c(*)c(CC)c1	0.5	0.5	random	2.128709354	6.766256349	-3.176387394	2.266893278
*c1cc(F)c(*)cc1F	*c1cc(*)c(C)c(N)c1	0.5	0.5	alternating	1.722724365	5.720934369	-3.549893584	1.315650276
*c1cc(F)c(*)cc1F	*c1cc(*)c(C)c(N)c1	0.5	0.5	block	2.262469173	5.62672315	-3.053328361	1.229918067
*c1cc(F)c(*)cc1F	*c1cc(*)c(C)c(N)c1	0.5	0.5	random	1.972287454	5.689730512	-3.320295542	1.287254766
*c1cc(F)c(*)cc1F	*c1c2ccccc2c(-c2c3ccccc3c(*)c3ccccc23)c2ccccc12	0.5	0.5	alternating	2.89986818	5.705298801	-2.466921274	1.301421909
*c1cc(F)c(*)cc1F	*c1c2ccccc2c(-c2c3ccccc3c(*)c3ccccc23)c2ccccc12	0.5	0.5	block	2.845886605	5.667690018	-2.516584324	1.267197916
*c1cc(F)c(*)cc1F	*c1c2ccccc2c(-c2c3ccccc3c(*)c3ccccc23)c2ccccc12	0.5	0.5	random	2.883426949	5.685307479	-2.482047207	1.283229806
*c1cc(F)c(*)cc1F	*c1cncc(C(=O)O)c1*	0.5	0.5	alternating	2.951091887	7.337081658	-2.419795464	2.786344309
*c1cc(F)c(*)cc1F	*c1cncc(C(=O)O)c1*	0.5	0.5	block	3.107443314	7.272338428	-2.275952151	2.72742797
*c1cc(F)c(*)cc1F	*c1cncc(C(=O)O)c1*	0.5	0.5	random	2.993212525	7.313405107	-2.381044477	2.764798647
*c1cc(F)c(*)cc1F	*c1cc(N)c(*)cn1	0.5	0.5	alternating	2.248425091	6.127933436	-3.066248917	1.686019427
*c1cc(F)c(*)cc1F	*c1cc(N)c(*)cn1	0.5	0.5	block	2.376219012	5.867076238	-2.948678509	1.448639377
*c1cc(F)c(*)cc1F	*c1cc(N)c(*)cn1	0.5	0.5	random	2.28318879	6.02411522	-3.034266314	1.59154485
*c1cc(F)c(*)cc1F	*c1cc(C(=O)O)c(*)cc1O	0.5	0.5	alternating	2.53357966	6.874947239	-2.803906713	2.365801988
*c1cc(F)c(*)cc1F	*c1cc(C(=O)O)c(*)cc1O	0.5	0.5	block	2.611803796	6.889529962	-2.731940508	2.379072265
*c1cc(F)c(*)cc1F	*c1cc(C(=O)O)c(*)cc1O	0.5	0.5	random	2.546296334	6.887881724	-2.792207373	2.377572369
*c1cc(F)c(*)cc1F	*c1cc(C(C)C)cc(*)c1N	0.5	0.5	alternating	1.688585757	5.672707392	-3.581301104	1.271763726
*c1cc(F)c(*)cc1F	*c1cc(C(C)C)cc(*)c1N	0.5	0.5	block	2.252681846	5.541988239	-3.062332701	1.152809297
*c1cc(F)c(*)cc1F	*c1cc(C(C)C)cc(*)c1N	0.5	0.5	random	1.933583246	5.644717188	-3.355903413	1.246292641
*c1cc(F)c(*)cc1F	*c1cc(F)c(F)cc1*	0.5	0.5	alternating	2.53166363	7.085649623	-2.80566946	2.557541157
*c1cc(F)c(*)cc1F	*c1cc(F)c(F)cc1*	0.5	0.5	block	2.676511319	7.121105173	-2.672409586	2.589805708
*c1cc(F)c(*)cc1F	*c1cc(F)c(F)cc1*	0.5	0.5	random	2.582063315	7.11488258	-2.75930175	2.584143147
*c1cc(F)c(*)cc1F	*c1cc(*)c(NC(C)=O)c(C(C)=O)c1	0.5	0.5	alternating	2.912343232	6.570500532	-2.455444226	2.088755484
*c1cc(F)c(*)cc1F	*c1cc(*)c(NC(C)=O)c(C(C)=O)c1	0.5	0.5	block	2.864174237	6.577958067	-2.499759702	2.095541841
*c1cc(F)c(*)cc1F	*c1cc(*)c(NC(C)=O)c(C(C)=O)c1	0.5	0.5	random	2.896890184	6.553999556	-2.469661031	2.073739596
*c1cc(F)c(*)cc1F	*c1c[nH]c2ccnc(*)c12	0.5	0.5	alternating	2.050210787	5.928930666	-3.248606076	1.504926906
*c1cc(F)c(*)cc1F	*c1c[nH]c2ccnc(*)c12	0.5	0.5	block	2.266363763	5.635851828	-3.049745338	1.238225163
*c1cc(F)c(*)cc1F	*c1c[nH]c2ccnc(*)c12	0.5	0.5	random	2.117410963	5.847951587	-3.186781914	1.431235945
*c1cc(F)c(*)cc1F	*c1nc(*)c(C(=O)O)s1	0.5	0.5	alternating	3.746551723	6.930732031	-1.687972415	2.416566148
*c1cc(F)c(*)cc1F	*c1nc(*)c(C(=O)O)s1	0.5	0.5	block	3.695828674	6.908131216	-1.73463762	2.395999407
*c1cc(F)c(*)cc1F	*c1nc(*)c(C(=O)O)s1	0.5	0.5	random	3.793299947	6.934012299	-1.644964049	2.419551192
*c1cc(F)c(*)cc1F	*c1cc(*)c2c(n1)CCCN2	0.5	0.5	alternating	2.05578871	5.512012908	-3.243474387	1.125531746
*c1cc(F)c(*)cc1F	*c1cc(*)c2c(n1)CCCN2	0.5	0.5	block	2.314552182	5.204203332	-3.005411992	0.845425032
*c1cc(F)c(*)cc1F	*c1cc(*)c2c(n1)CCCN2	0.5	0.5	random	2.134641501	5.355568161	-3.170929819	0.983167027
*c1cc(F)c(*)cc1F	*c1ccsc1-c1sccc1*	0.5	0.5	alternating	2.616314926	5.83256933	-2.727790268	1.41723809
*c1cc(F)c(*)cc1F	*c1ccsc1-c1sccc1*	0.5	0.5	block	2.596993979	5.824178495	-2.74556554	1.40960243
*c1cc(F)c(*)cc1F	*c1ccsc1-c1sccc1*	0.5	0.5	random	2.597478338	5.825462845	-2.745119929	1.410771189
*c1cc(F)c(*)cc1F	*c1cc(O)c(*)cc1O	0.5	0.5	alternating	2.299776725	6.00900236	-3.019005413	1.577792147
*c1cc(F)c(*)cc1F	*c1cc(O)c(*)cc1O	0.5	0.5	block	2.422551431	5.924262859	-2.906052684	1.500679201
*c1cc(F)c(*)cc1F	*c1cc(O)c(*)cc1O	0.5	0.5	random	2.322811358	5.974057733	-2.99781355	1.545992537
*c1cc(F)c(*)cc1F	*c1cc(C)c(N)c(*)n1	0.5	0.5	alternating	1.976879543	5.648587442	-3.31607082	1.249814572
*c1cc(F)c(*)cc1F	*c1cc(C)c(N)c(*)n1	0.5	0.5	block	2.244502148	5.044364248	-3.069858023	0.699971466
*c1cc(F)c(*)cc1F	*c1cc(C)c(N)c(*)n1	0.5	0.5	random	2.07083808	5.348223067	-3.229628966	0.976482991
*c1cc(F)c(*)cc1F	*c1cc(*)c2c(=O)[nH][nH]c2c1	0.5	0.5	alternating	2.419778569	6.081673026	-2.908603716	1.643922454
*c1cc(F)c(*)cc1F	*c1cc(*)c2c(=O)[nH][nH]c2c1	0.5	0.5	block	2.477462543	6.073079055	-2.855534461	1.63610194
*c1cc(F)c(*)cc1F	*c1cc(*)c2c(=O)[nH][nH]c2c1	0.5	0.5	random	2.446600871	6.077658146	-2.883927198	1.640268913
*c1cc(F)c(*)cc1F	*c1cc(C(=O)OC)c(*)s1	0.5	0.5	alternating	3.284539578	6.443596107	-2.113023588	1.973272458
*c1cc(F)c(*)cc1F	*c1cc(C(=O)OC)c(*)s1	0.5	0.5	block	3.308192686	6.345979642	-2.091262729	1.884441474
*c1cc(F)c(*)cc1F	*c1cc(C(=O)OC)c(*)s1	0.5	0.5	random	3.285827577	6.401847786	-2.111838629	1.935281486
*c1cc(F)c(*)cc1F	*c1cc(C=O)c(*)cn1	0.5	0.5	alternating	3.491917172	6.912820824	-1.922236202	2.40026695
*c1cc(F)c(*)cc1F	*c1cc(C=O)c(*)cn1	0.5	0.5	block	3.50908154	6.880108313	-1.906444983	2.370498565
*c1cc(F)c(*)cc1F	*c1cc(C=O)c(*)cn1	0.5	0.5	random	3.487305136	6.892617399	-1.926479275	2.381881833
*c1cc(F)c(*)cc1F	*c1nc(*)c(C)[nH]1	0.5	0.5	alternating	2.057606425	5.72147317	-3.241802089	1.316140585
*c1cc(F)c(*)cc1F	*c1nc(*)c(C)[nH]1	0.5	0.5	block	2.272371517	5.232222017	-3.044218204	0.870922036
*c1cc(F)c(*)cc1F	*c1nc(*)c(C)[nH]1	0.5	0.5	random	2.109267284	5.561297719	-3.194274098	1.170380925
*c1cc(F)c(*)cc1F	*c1cc([N+](=O)[O-])c(*)cc1NC(C)=O	0.5	0.5	alternating	3.546505565	7.047778847	-1.872014881	2.523078751
*c1cc(F)c(*)cc1F	*c1cc([N+](=O)[O-])c(*)cc1NC(C)=O	0.5	0.5	block	3.601799926	7.039759557	-1.821144068	2.515781197
*c1cc(F)c(*)cc1F	*c1cc([N+](=O)[O-])c(*)cc1NC(C)=O	0.5	0.5	random	3.579374874	7.046450165	-1.841775116	2.52186965
*c1cc(F)c(*)cc1F	*c1cc(*)c(N)c(CO)c1	0.5	0.5	alternating	1.730428124	5.656076663	-3.542806126	1.256629763
*c1cc(F)c(*)cc1F	*c1cc(*)c(N)c(CO)c1	0.5	0.5	block	2.232528695	5.446201116	-3.080873601	1.065643015
*c1cc(F)c(*)cc1F	*c1cc(*)c(N)c(CO)c1	0.5	0.5	random	1.944236972	5.554516542	-3.346101986	1.164210054
*c1cc(F)c(*)cc1F	*c1ccc(OCC(=O)NN)c(*)c1	0.5	0.5	alternating	2.023025148	6.17552097	-3.273616864	1.729324082
*c1cc(F)c(*)cc1F	*c1ccc(OCC(=O)NN)c(*)c1	0.5	0.5	block	2.330502531	6.07407373	-2.990737671	1.637007095
*c1cc(F)c(*)cc1F	*c1ccc(OCC(=O)NN)c(*)c1	0.5	0.5	random	2.157325396	6.157512416	-3.150060635	1.712936299
*c1cc(F)c(*)cc1F	*c1cc(*)c(Cl)c(C)c1N	0.5	0.5	alternating	1.851419398	5.840562535	-3.431494154	1.424511907
*c1cc(F)c(*)cc1F	*c1cc(*)c(Cl)c(C)c1N	0.5	0.5	block	2.308040014	5.786896672	-3.011403187	1.375675972
*c1cc(F)c(*)cc1F	*c1cc(*)c(Cl)c(C)c1N	0.5	0.5	random	2.047322324	5.812202915	-3.251263462	1.398704653
*c1cc(F)c(*)cc1F	*c1cc(C)cn2c(*)cnc12	0.5	0.5	alternating	2.263090948	5.781855759	-3.052756327	1.371088741
*c1cc(F)c(*)cc1F	*c1cc(C)cn2c(*)cnc12	0.5	0.5	block	2.38793621	5.539186963	-2.937898687	1.150260136
*c1cc(F)c(*)cc1F	*c1cc(C)cn2c(*)cnc12	0.5	0.5	random	2.294592277	5.654224991	-3.023775105	1.254944742
*c1cc(F)c(*)cc1F	*c1ccc(*)c(NC(C)=O)c1	0.5	0.5	alternating	2.271996622	6.416957602	-3.044563108	1.949031418
*c1cc(F)c(*)cc1F	*c1ccc(*)c(NC(C)=O)c1	0.5	0.5	block	2.415005278	6.353125208	-2.912995144	1.890943939
*c1cc(F)c(*)cc1F	*c1ccc(*)c(NC(C)=O)c1	0.5	0.5	random	2.322489582	6.399497631	-2.998109585	1.933142844
*c1cc(F)c(*)cc1F	*c1cc(*)cc(F)c1	0.5	0.5	alternating	2.358863253	6.934236123	-2.964645807	2.419754872
*c1cc(F)c(*)cc1F	*c1cc(*)cc(F)c1	0.5	0.5	block	2.476612471	6.934857386	-2.856316526	2.420320221
*c1cc(F)c(*)cc1F	*c1cc(*)cc(F)c1	0.5	0.5	random	2.410750301	6.935389803	-2.916909723	2.420804721
*c1cc(F)c(*)cc1F	*c1cnc2c(*)ccnc2c1	0.5	0.5	alternating	3.199482255	6.702918615	-2.191276326	2.20925594
*c1cc(F)c(*)cc1F	*c1cnc2c(*)ccnc2c1	0.5	0.5	block	3.148756903	6.589588217	-2.237943649	2.106125278
*c1cc(F)c(*)cc1F	*c1cnc2c(*)ccnc2c1	0.5	0.5	random	3.192028141	6.646366273	-2.19813411	2.157793309
*c1cc(F)c(*)cc1F	*c1cc(Cl)cc(*)c1F	0.5	0.5	alternating	2.506326515	7.137017327	-2.828979606	2.604285768
*c1cc(F)c(*)cc1F	*c1cc(Cl)cc(*)c1F	0.5	0.5	block	2.577229103	7.085297968	-2.763749225	2.557221151
*c1cc(F)c(*)cc1F	*c1cc(Cl)cc(*)c1F	0.5	0.5	random	2.558379753	7.108205988	-2.781090627	2.578067449
*c1cc(F)c(*)cc1F	*c1cncc(*)c1	0.5	0.5	alternating	2.386999092	6.825134864	-2.938760835	2.320472726
*c1cc(F)c(*)cc1F	*c1cncc(*)c1	0.5	0.5	block	2.478374177	6.819203158	-2.854695757	2.315074874
*c1cc(F)c(*)cc1F	*c1cncc(*)c1	0.5	0.5	random	2.425732251	6.822148799	-2.903126329	2.317755407
*c1cc(F)c(*)cc1F	*c1cc(C(N)=NO)cc(*)c1OC	0.5	0.5	alternating	2.111311052	6.095255833	-3.192393832	1.656282808
*c1cc(F)c(*)cc1F	*c1cc(C(N)=NO)cc(*)c1OC	0.5	0.5	block	2.421193473	6.080621447	-2.907302005	1.642965517
*c1cc(F)c(*)cc1F	*c1cc(C(N)=NO)cc(*)c1OC	0.5	0.5	random	2.276589439	6.116352159	-3.040337717	1.675480464
*c1cc(F)c(*)cc1F	*c1ccc(*)c(OC(F)F)c1	0.5	0.5	alternating	2.577614856	6.814705493	-2.763394333	2.310981999
*c1cc(F)c(*)cc1F	*c1ccc(*)c(OC(F)F)c1	0.5	0.5	block	2.618853172	6.809746879	-2.725455082	2.30646966
*c1cc(F)c(*)cc1F	*c1ccc(*)c(OC(F)F)c1	0.5	0.5	random	2.582985263	6.812303007	-2.758453558	2.308795737
*c1cc(F)c(*)cc1F	*c1cc(C)c([N+](=O)[O-])c(*)c1N	0.5	0.5	alternating	3.320075059	6.166108899	-2.080330946	1.720759098
*c1cc(F)c(*)cc1F	*c1cc(C)c([N+](=O)[O-])c(*)c1N	0.5	0.5	block	3.273109387	6.234444338	-2.123539364	1.782944347
*c1cc(F)c(*)cc1F	*c1cc(C)c([N+](=O)[O-])c(*)c1N	0.5	0.5	random	3.301529701	6.197236749	-2.097392675	1.749085441
*c1cc(F)c(*)cc1F	*c1ccc(*)c(OC)c1	0.5	0.5	alternating	2.264889386	6.334242372	-3.051101765	1.873760558
*c1cc(F)c(*)cc1F	*c1ccc(*)c(OC)c1	0.5	0.5	block	2.411639745	6.233248379	-2.916091434	1.781856025
*c1cc(F)c(*)cc1F	*c1ccc(*)c(OC)c1	0.5	0.5	random	2.321351312	6.297197444	-2.999156793	1.840049674
*c1cc(F)c(*)cc1F	*c1ccc(*)nc1	0.5	0.5	alternating	2.782843641	6.669588596	-2.57458385	2.178925622
*c1cc(F)c(*)cc1F	*c1ccc(*)nc1	0.5	0.5	block	2.772159014	6.639711162	-2.584413707	2.151737157
*c1cc(F)c(*)cc1F	*c1ccc(*)nc1	0.5	0.5	random	2.761302805	6.665222487	-2.59440142	2.174952463
*c1cc(F)c(*)cc1F	*c1cc(Cl)cc(*)n1	0.5	0.5	alternating	2.859082546	6.971770173	-2.504444058	2.453910858
*c1cc(F)c(*)cc1F	*c1cc(Cl)cc(*)n1	0.5	0.5	block	2.757288455	6.993875098	-2.598094622	2.474026339
*c1cc(F)c(*)cc1F	*c1cc(Cl)cc(*)n1	0.5	0.5	random	2.816017132	6.985733289	-2.544064239	2.466617293
*c1cc(F)c(*)cc1F	*c1ccc(*)c(F)c1	0.5	0.5	alternating	2.528187436	6.76806029	-2.808867559	2.268534864
*c1cc(F)c(*)cc1F	*c1ccc(*)c(F)c1	0.5	0.5	block	2.542712966	6.745167209	-2.795504072	2.24770216
*c1cc(F)c(*)cc1F	*c1ccc(*)c(F)c1	0.5	0.5	random	2.529061351	6.759963872	-2.808063557	2.261167124
*c1cc(F)c(*)cc1F	*c1cnc(N)c(*)c1	0.5	0.5	alternating	1.919070849	5.81322984	-3.369254819	1.399639155
*c1cc(F)c(*)cc1F	*c1cnc(N)c(*)c1	0.5	0.5	block	2.297198171	5.619960965	-3.021377683	1.223764478
*c1cc(F)c(*)cc1F	*c1cnc(N)c(*)c1	0.5	0.5	random	2.089269069	5.74077617	-3.212672457	1.333706315
*c1cc(F)c(*)cc1F	*c1ccn2nc(*)nc2c1	0.5	0.5	alternating	2.722939377	6.709785228	-2.629695773	2.215504557
*c1cc(F)c(*)cc1F	*c1ccn2nc(*)nc2c1	0.5	0.5	block	2.672176872	6.699944617	-2.676397278	2.206549601
*c1cc(F)c(*)cc1F	*c1ccn2nc(*)nc2c1	0.5	0.5	random	2.6904915	6.707009243	-2.65954782	2.212978411
*c1cc(F)c(*)cc1F	*c1cc(*)c(N)c(OC)n1	0.5	0.5	alternating	2.134548487	5.512264431	-3.171015392	1.125760632
*c1cc(F)c(*)cc1F	*c1cc(*)c(N)c(OC)n1	0.5	0.5	block	2.342489002	5.21815612	-2.979710118	0.85812207
*c1cc(F)c(*)cc1F	*c1cc(*)c(N)c(OC)n1	0.5	0.5	random	2.217137625	5.391903118	-3.095033385	1.016231837
*c1cc(F)c(*)cc1F	*c1cnc(Cl)c(*)c1C	0.5	0.5	alternating	2.324578447	7.1203799	-2.996187828	2.589145709
*c1cc(F)c(*)cc1F	*c1cnc(Cl)c(*)c1C	0.5	0.5	block	2.485025206	7.049062328	-2.848576811	2.524246719
*c1cc(F)c(*)cc1F	*c1cnc(Cl)c(*)c1C	0.5	0.5	random	2.405849997	7.082830755	-2.921418002	2.554975987
*c1cc(F)c(*)cc1F	*c1cc(C)cc(*)c1[N+](=O)[O-]	0.5	0.5	alternating	3.515563424	7.292710846	-1.90048165	2.74596687
*c1cc(F)c(*)cc1F	*c1cc(C)cc(*)c1[N+](=O)[O-]	0.5	0.5	block	3.742663995	7.234254479	-1.691549124	2.692771576
*c1cc(F)c(*)cc1F	*c1cc(C)cc(*)c1[N+](=O)[O-]	0.5	0.5	random	3.620287584	7.273719484	-1.804135422	2.72868473
*c1cc(F)c(*)cc1F	*c1cc(N)c(*)cc1C	0.5	0.5	alternating	1.637836518	5.620499272	-3.627990404	1.224254338
*c1cc(F)c(*)cc1F	*c1cc(N)c(*)cc1C	0.5	0.5	block	2.252581015	5.519233036	-3.062425466	1.132102063
*c1cc(F)c(*)cc1F	*c1cc(N)c(*)cc1C	0.5	0.5	random	1.894733529	5.578156969	-3.391645154	1.185722842
*c1cc(F)c(*)cc1F	*c1c[nH]c(=O)c(*)c1C(F)(F)F	0.5	0.5	alternating	2.770747172	6.709579087	-2.585712602	2.215316969
*c1cc(F)c(*)cc1F	*c1c[nH]c(=O)c(*)c1C(F)(F)F	0.5	0.5	block	2.825505678	6.793225016	-2.535334776	2.291434765
*c1cc(F)c(*)cc1F	*c1c[nH]c(=O)c(*)c1C(F)(F)F	0.5	0.5	random	2.762240843	6.764332862	-2.593538425	2.265142905
*c1cc(F)c(*)cc1F	*c1nc(*)c(CO)s1	0.5	0.5	alternating	2.991157792	6.354237233	-2.382934831	1.891955882
*c1cc(F)c(*)cc1F	*c1nc(*)c(CO)s1	0.5	0.5	block	2.802680305	6.135472638	-2.55633412	1.692880101
*c1cc(F)c(*)cc1F	*c1nc(*)c(CO)s1	0.5	0.5	random	2.958592373	6.294875253	-2.412895017	1.83793648
*c1cc(F)c(*)cc1F	*c1nn(C)c(*)c1[N+](=O)[O-]	0.5	0.5	alternating	3.358453141	7.376660614	-2.045023111	2.822361158
*c1cc(F)c(*)cc1F	*c1nn(C)c(*)c1[N+](=O)[O-]	0.5	0.5	block	3.586409289	7.228880125	-1.835303454	2.687880913
*c1cc(F)c(*)cc1F	*c1nn(C)c(*)c1[N+](=O)[O-]	0.5	0.5	random	3.47845699	7.293999901	-1.93461957	2.74713991
*c1cc(F)c(*)cc1F	*c1ccc2c(*)nc(N)cc2c1	0.5	0.5	alternating	2.546603918	5.633158125	-2.791924396	1.235773894
*c1cc(F)c(*)cc1F	*c1ccc2c(*)nc(N)cc2c1	0.5	0.5	block	2.593200169	5.53881685	-2.749055845	1.149923334
*c1cc(F)c(*)cc1F	*c1ccc2c(*)nc(N)cc2c1	0.5	0.5	random	2.582839174	5.585173294	-2.75858796	1.192107697
*c1cc(F)c(*)cc1F	*c1cc([N+](=O)[O-])c(*)cc1N	0.5	0.5	alternating	3.143334764	6.366820439	-2.242932017	1.9034066
*c1cc(F)c(*)cc1F	*c1cc([N+](=O)[O-])c(*)cc1N	0.5	0.5	block	3.130414817	6.417097018	-2.254818368	1.949158287
*c1cc(F)c(*)cc1F	*c1cc([N+](=O)[O-])c(*)cc1N	0.5	0.5	random	3.150237071	6.387369746	-2.236581895	1.922106469
*c1cc(F)c(*)cc1F	*c1cc(*)c2c(c1)CCC(=O)N2	0.5	0.5	alternating	2.181258344	6.293250814	-3.128042323	1.836458241
*c1cc(F)c(*)cc1F	*c1cc(*)c2c(c1)CCC(=O)N2	0.5	0.5	block	2.386846907	6.237432733	-2.938900845	1.785663787
*c1cc(F)c(*)cc1F	*c1cc(*)c2c(c1)CCC(=O)N2	0.5	0.5	random	2.257997186	6.281683829	-3.057442589	1.825932285
*c1cc(F)c(*)cc1F	*c1cn(C)c(*)n1	0.5	0.5	alternating	1.928903416	5.886730268	-3.360208858	1.466524544
*c1cc(F)c(*)cc1F	*c1cn(C)c(*)n1	0.5	0.5	block	2.278842488	5.453128506	-3.038264911	1.071946941
*c1cc(F)c(*)cc1F	*c1cn(C)c(*)n1	0.5	0.5	random	2.065428509	5.71725527	-3.234605772	1.312302296
*c1cc(F)c(*)cc1F	*c1cnc(*)s1	0.5	0.5	alternating	3.426217411	6.176684752	-1.982679982	1.730383124
*c1cc(F)c(*)cc1F	*c1cnc(*)s1	0.5	0.5	block	3.309516412	6.138729445	-2.090044901	1.695843795
*c1cc(F)c(*)cc1F	*c1cnc(*)s1	0.5	0.5	random	3.356936661	6.1846092	-2.046418272	1.737594372
*c1cc(F)c(*)cc1F	*c1cncc(*)c1Cl	0.5	0.5	alternating	2.507324815	7.160523803	-2.82806117	2.625676661
*c1cc(F)c(*)cc1F	*c1cncc(*)c1Cl	0.5	0.5	block	2.609918655	7.095749005	-2.733674838	2.566731595
*c1cc(F)c(*)cc1F	*c1cncc(*)c1Cl	0.5	0.5	random	2.538729397	7.130693164	-2.799168954	2.598530779
*c1cc(F)c(*)cc1F	*c1ccc(*)c(NC(C)=S)c1	0.5	0.5	alternating	2.565233527	5.676770415	-2.774785156	1.275461077
*c1cc(F)c(*)cc1F	*c1ccc(*)c(NC(C)=S)c1	0.5	0.5	block	2.572429932	5.644348548	-2.768164462	1.245957179
*c1cc(F)c(*)cc1F	*c1ccc(*)c(NC(C)=S)c1	0.5	0.5	random	2.567900815	5.670617479	-2.77233125	1.269861906
*c1cc(F)c(*)cc1F	*c1cnc(*)nc1	0.5	0.5	alternating	3.219733995	6.789858407	-2.172644724	2.288371151
*c1cc(F)c(*)cc1F	*c1cnc(*)nc1	0.5	0.5	block	3.243633562	6.806828822	-2.150657123	2.303814228
*c1cc(F)c(*)cc1F	*c1cnc(*)nc1	0.5	0.5	random	3.215648987	6.806806858	-2.176402932	2.303794241
*c1cc(F)c(*)cc1F	*c1cc(*)c2c(N)n[nH]c2c1	0.5	0.5	alternating	2.160009383	5.527271069	-3.147591368	1.139416673
*c1cc(F)c(*)cc1F	*c1cc(*)c2c(N)n[nH]c2c1	0.5	0.5	block	2.317811726	5.406548115	-3.002413212	1.029558784
*c1cc(F)c(*)cc1F	*c1cc(*)c2c(N)n[nH]c2c1	0.5	0.5	random	2.202678094	5.485432105	-3.108336153	1.101343215
*c1cc(F)c(*)cc1F	*c1cc2ccccc2c(*)n1	0.5	0.5	alternating	2.717039032	6.406175083	-2.635124091	1.939219325
*c1cc(F)c(*)cc1F	*c1cc2ccccc2c(*)n1	0.5	0.5	block	2.700588343	6.196293091	-2.650258724	1.748226713
*c1cc(F)c(*)cc1F	*c1cc2ccccc2c(*)n1	0.5	0.5	random	2.728160393	6.327167003	-2.624892438	1.867321972
*c1cc(F)c(*)cc1F	*c1cccc(*)c1CC#N	0.5	0.5	alternating	1.99527188	7.093160586	-3.29914987	2.564376133
*c1cc(F)c(*)cc1F	*c1cccc(*)c1CC#N	0.5	0.5	block	2.355464598	7.04092593	-2.96777257	2.516842596
*c1cc(F)c(*)cc1F	*c1cccc(*)c1CC#N	0.5	0.5	random	2.131581146	7.081145051	-3.173745346	2.553441997
*c1cc(F)c(*)cc1F	*c1n[nH]c(*)n1	0.5	0.5	alternating	2.654244942	6.716006359	-2.692894654	2.221165786
*c1cc(F)c(*)cc1F	*c1n[nH]c(*)n1	0.5	0.5	block	2.502422458	6.841307124	-2.832571338	2.335189483
*c1cc(F)c(*)cc1F	*c1n[nH]c(*)n1	0.5	0.5	random	2.601250617	6.793934298	-2.741649433	2.292080211
*c1cc(F)c(*)cc1F	*c1cc(*)c(F)c(C)c1N	0.5	0.5	alternating	1.762781125	5.74472452	-3.513041365	1.337299313
*c1cc(F)c(*)cc1F	*c1cc(*)c(F)c(C)c1N	0.5	0.5	block	2.277913093	5.589672583	-3.039119954	1.196202051
*c1cc(F)c(*)cc1F	*c1cc(*)c(F)c(C)c1N	0.5	0.5	random	2.004343326	5.698931348	-3.29080414	1.295627526
*c1cc(F)c(*)cc1F	*c1cc(OC)cc(*)c1N	0.5	0.5	alternating	1.770695603	5.424488743	-3.505760045	1.045884756
*c1cc(F)c(*)cc1F	*c1cc(OC)cc(*)c1N	0.5	0.5	block	2.276836831	5.333992049	-3.040110116	0.963532764
*c1cc(F)c(*)cc1F	*c1cc(OC)cc(*)c1N	0.5	0.5	random	1.996074748	5.400192893	-3.298411232	1.023775533
*c1cc(F)c(*)cc1F	*c1cn2cc(C(=O)OCC)nc2c(*)n1	0.5	0.5	alternating	3.231285858	6.603377318	-2.16201701	2.11867336
*c1cc(F)c(*)cc1F	*c1cn2cc(C(=O)OCC)nc2c(*)n1	0.5	0.5	block	3.073172883	6.594174758	-2.307480948	2.11029903
*c1cc(F)c(*)cc1F	*c1cn2cc(C(=O)OCC)nc2c(*)n1	0.5	0.5	random	3.201244544	6.600677204	-2.18965502	2.116216256
*c1cc(F)c(*)cc1F	*c1ccc2c(c1)sc1cc(*)ccc12	0.5	0.5	alternating	2.54384402	6.190234616	-2.794463501	1.742713501
*c1cc(F)c(*)cc1F	*c1ccc2c(c1)sc1cc(*)ccc12	0.5	0.5	block	2.572414021	6.062015564	-2.768179101	1.626034163
*c1cc(F)c(*)cc1F	*c1ccc2c(c1)sc1cc(*)ccc12	0.5	0.5	random	2.549739997	6.142222968	-2.789039202	1.699022901
*c1cc(F)c(*)cc1F	*c1cc(*)cc(CBr)c1	0.5	0.5	alternating	2.200652246	6.793948989	-3.110199933	2.29209358
*c1cc(F)c(*)cc1F	*c1cc(*)cc(CBr)c1	0.5	0.5	block	2.391061659	6.778113746	-2.935023273	2.277683509
*c1cc(F)c(*)cc1F	*c1cc(*)cc(CBr)c1	0.5	0.5	random	2.291432746	6.791727359	-3.026681874	2.290071897
*c1cc(F)c(*)cc1F	*c1cc(C)c(N)c(*)c1Cl	0.5	0.5	alternating	1.696925749	5.893246745	-3.573628311	1.472454538
*c1cc(F)c(*)cc1F	*c1cc(C)c(N)c(*)c1Cl	0.5	0.5	block	2.309288166	5.864802542	-3.010254887	1.446570313
*c1cc(F)c(*)cc1F	*c1cc(C)c(N)c(*)c1Cl	0.5	0.5	random	1.993805907	5.859589139	-3.300498565	1.441826117
*c1cc(F)c(*)cc1F	*c1cc(C(F)(F)F)cc(*)n1	0.5	0.5	alternating	2.988295346	7.079809846	-2.385568282	2.55222696
*c1cc(F)c(*)cc1F	*c1cc(C(F)(F)F)cc(*)n1	0.5	0.5	block	2.888895734	7.074703086	-2.477015925	2.547579808
*c1cc(F)c(*)cc1F	*c1cc(C(F)(F)F)cc(*)n1	0.5	0.5	random	2.933046163	7.083503035	-2.43639753	2.555587761
*c1cc(F)c(*)cc1F	*c1ccc2c(c1)S(=O)(=O)c1cc(*)ccc1-2	0.5	0.5	alternating	2.979485583	6.514500877	-2.393673264	2.037795798
*c1cc(F)c(*)cc1F	*c1ccc2c(c1)S(=O)(=O)c1cc(*)ccc1-2	0.5	0.5	block	2.975859503	6.467835223	-2.397009257	1.995330053
*c1cc(F)c(*)cc1F	*c1ccc2c(c1)S(=O)(=O)c1cc(*)ccc1-2	0.5	0.5	random	2.983419736	6.495600359	-2.390053843	2.020596327
*c1cc(F)c(*)cc1F	*c1ccc(*)c(CN)c1	0.5	0.5	alternating	2.0203806	6.421388236	-3.276049848	1.953063295
*c1cc(F)c(*)cc1F	*c1ccc(*)c(CN)c1	0.5	0.5	block	2.295500616	6.333514025	-3.022939433	1.873097762
*c1cc(F)c(*)cc1F	*c1ccc(*)c(CN)c1	0.5	0.5	random	2.099641801	6.389363506	-3.203129543	1.92392079
*c1cc(F)c(*)cc1F	*c1cc(*)cc(OC(F)F)c1	0.5	0.5	alternating	2.434968205	6.947639462	-2.894629251	2.43195191
*c1cc(F)c(*)cc1F	*c1cc(*)cc(OC(F)F)c1	0.5	0.5	block	2.509888169	6.936120739	-2.825702885	2.421469872
*c1cc(F)c(*)cc1F	*c1cc(*)cc(OC(F)F)c1	0.5	0.5	random	2.465670007	6.941580868	-2.866383593	2.42643859
*c1cc(F)c(*)cc1F	*c1cccc(*)c1OC	0.5	0.5	alternating	2.157426421	6.654764469	-3.149967692	2.165435667
*c1cc(F)c(*)cc1F	*c1cccc(*)c1OC	0.5	0.5	block	2.401912796	6.590969764	-2.925040227	2.107382486
*c1cc(F)c(*)cc1F	*c1cccc(*)c1OC	0.5	0.5	random	2.216559268	6.588691209	-3.095565473	2.105309
*c1cc(F)c(*)cc1F	*c1cc(*)c(N)c(OC(F)F)c1	0.5	0.5	alternating	2.026912074	5.764122176	-3.270040892	1.35495118
*c1cc(F)c(*)cc1F	*c1cc(*)c(N)c(OC(F)F)c1	0.5	0.5	block	2.366748776	5.640630694	-2.957391126	1.242573931
*c1cc(F)c(*)cc1F	*c1cc(*)c(N)c(OC(F)F)c1	0.5	0.5	random	2.174228448	5.718866049	-3.134509827	1.313768105
*c1cc(F)c(*)cc1F	*c1cc(*)c(F)c(F)c1O	0.5	0.5	alternating	2.342865779	6.708573838	-2.979363483	2.214402193
*c1cc(F)c(*)cc1F	*c1cc(*)c(F)c(F)c1O	0.5	0.5	block	2.471383144	6.73368735	-2.861127507	2.237255489
*c1cc(F)c(*)cc1F	*c1cc(*)c(F)c(F)c1O	0.5	0.5	random	2.425991863	6.723285044	-2.902887486	2.22778939
*c1cc(F)c(*)cc1F	*c1cc(Cl)cn2c(*)cnc12	0.5	0.5	alternating	2.590385563	6.047211958	-2.751645282	1.612562882
*c1cc(F)c(*)cc1F	*c1cc(Cl)cn2c(*)cnc12	0.5	0.5	block	2.601333993	5.905199455	-2.741572727	1.483331504
*c1cc(F)c(*)cc1F	*c1cc(Cl)cn2c(*)cnc12	0.5	0.5	random	2.588872881	5.97401698	-2.753036949	1.545955452
*c1cc(F)c(*)cc1F	*c1nnc(*)s1	0.5	0.5	alternating	3.76797694	6.927512112	-1.668261216	2.413636022
*c1cc(F)c(*)cc1F	*c1nnc(*)s1	0.5	0.5	block	3.850894528	7.067323316	-1.591977034	2.540864217
*c1cc(F)c(*)cc1F	*c1nnc(*)s1	0.5	0.5	random	3.75224474	7.000672922	-1.682734839	2.480212359
*c1cc(F)c(*)cc1F	*c1ccc(OC(F)(F)F)cc1*	0.5	0.5	alternating	2.738473864	7.09351996	-2.615404045	2.564703164
*c1cc(F)c(*)cc1F	*c1ccc(OC(F)(F)F)cc1*	0.5	0.5	block	2.829167051	7.069152925	-2.531966313	2.542529161
*c1cc(F)c(*)cc1F	*c1ccc(OC(F)(F)F)cc1*	0.5	0.5	random	2.754323172	7.102199614	-2.600822681	2.572601648
*c1cc(F)c(*)cc1F	*c1cc(C)c(*)nc1C	0.5	0.5	alternating	2.190854239	6.772227854	-3.1192141	2.272327347
*c1cc(F)c(*)cc1F	*c1cc(C)c(*)nc1C	0.5	0.5	block	2.382480896	6.676642368	-2.942917575	2.185344555
*c1cc(F)c(*)cc1F	*c1cc(C)c(*)nc1C	0.5	0.5	random	2.288780035	6.715602275	-3.029122368	2.22079807
*c1cc(F)c(*)cc1F	*c1cc(F)c(Cl)c(*)c1N	0.5	0.5	alternating	2.097474777	6.068553957	-3.205123206	1.631984101
*c1cc(F)c(*)cc1F	*c1cc(F)c(Cl)c(*)c1N	0.5	0.5	block	2.355194964	6.121782241	-2.968020633	1.680421839
*c1cc(F)c(*)cc1F	*c1cc(F)c(Cl)c(*)c1N	0.5	0.5	random	2.219887898	6.09390961	-3.092503134	1.655057745
*c1cc(F)c(*)cc1F	*c1ccc(*)c(Cl)c1C	0.5	0.5	alternating	2.077231604	7.036135561	-3.223746924	2.51248336
*c1cc(F)c(*)cc1F	*c1ccc(*)c(Cl)c1C	0.5	0.5	block	2.381607304	6.986054206	-2.94372128	2.466909327
*c1cc(F)c(*)cc1F	*c1ccc(*)c(Cl)c1C	0.5	0.5	random	2.22562674	7.012188006	-3.087223399	2.490691085
*c1cc(F)c(*)cc1F	*c1cc(N)cc(*)n1	0.5	0.5	alternating	2.095824773	6.204397117	-3.206641208	1.755601377
*c1cc(F)c(*)cc1F	*c1cc(N)cc(*)n1	0.5	0.5	block	2.238293074	6.057070815	-3.075570372	1.621534441
*c1cc(F)c(*)cc1F	*c1cc(N)cc(*)n1	0.5	0.5	random	2.160735387	6.144861157	-3.146923444	1.701423653
*c1cc(F)c(*)cc1F	*c1cn(C)c(=O)c(*)n1	0.5	0.5	alternating	2.995209998	6.184357074	-2.379206802	1.737364937
*c1cc(F)c(*)cc1F	*c1cn(C)c(=O)c(*)n1	0.5	0.5	block	2.788102235	6.052814938	-2.569745944	1.617661594
*c1cc(F)c(*)cc1F	*c1cn(C)c(=O)c(*)n1	0.5	0.5	random	2.914427227	6.084941059	-2.453526951	1.646896363
*c1cc(F)c(*)cc1F	*c1cnc(N(C)C)c(*)n1	0.5	0.5	alternating	2.389471804	5.620188661	-2.93648594	1.223971681
*c1cc(F)c(*)cc1F	*c1cnc(N(C)C)c(*)n1	0.5	0.5	block	2.437949578	5.272213276	-2.891886388	0.907314081
*c1cc(F)c(*)cc1F	*c1cnc(N(C)C)c(*)n1	0.5	0.5	random	2.412647009	5.475973522	-2.915164752	1.092735905
*c1cc(F)c(*)cc1F	*c1ccc(-c2ccc(*)cc2)cc1	0.5	0.5	alternating	2.356105111	6.27186451	-2.967183298	1.816996704
*c1cc(F)c(*)cc1F	*c1ccc(-c2ccc(*)cc2)cc1	0.5	0.5	block	2.459930565	6.112392381	-2.87166388	1.671877067
*c1cc(F)c(*)cc1F	*c1ccc(-c2ccc(*)cc2)cc1	0.5	0.5	random	2.400357742	6.202267101	-2.926470877	1.753663062
*c1cc(F)c(*)cc1F	*c1cc(C)c(N)c(*)c1F	0.5	0.5	alternating	1.726384718	5.767543919	-3.546526059	1.358064966
*c1cc(F)c(*)cc1F	*c1cc(C)c(N)c(*)c1F	0.5	0.5	block	2.299283799	5.63504202	-3.019458905	1.237488239
*c1cc(F)c(*)cc1F	*c1cc(C)c(N)c(*)c1F	0.5	0.5	random	2.0015217	5.717135128	-3.293400036	1.312192966
*c1cc(F)c(*)cc1F	*c1ccc(-c2ccc(-c3ccc(*)s3)s2)s1	0.5	0.5	alternating	3.238442402	5.145883371	-2.15543299	0.792353868
*c1cc(F)c(*)cc1F	*c1ccc(-c2ccc(-c3ccc(*)s3)s2)s1	0.5	0.5	block	3.162002733	4.912292584	-2.225757486	0.579786251
*c1cc(F)c(*)cc1F	*c1ccc(-c2ccc(-c3ccc(*)s3)s2)s1	0.5	0.5	random	3.195661199	5.080263115	-2.194791697	0.732639435
*c1cc(F)c(*)cc1F	*c1ccc(*)[n+]([O-])c1	0.5	0.5	alternating	2.89680565	6.612457153	-2.469738802	2.126936009
*c1cc(F)c(*)cc1F	*c1ccc(*)[n+]([O-])c1	0.5	0.5	block	2.903241829	6.661553345	-2.463817517	2.171613544
*c1cc(F)c(*)cc1F	*c1ccc(*)[n+]([O-])c1	0.5	0.5	random	2.893505383	6.622415554	-2.472775048	2.135998154
*c1cc(F)c(*)cc1F	*c1cc(*)c(F)c(C#N)c1	0.5	0.5	alternating	2.705265629	7.172511662	-2.645955621	2.636585612
*c1cc(F)c(*)cc1F	*c1cc(*)c(F)c(C#N)c1	0.5	0.5	block	2.736074714	7.14109959	-2.617611263	2.608000627
*c1cc(F)c(*)cc1F	*c1cc(*)c(F)c(C#N)c1	0.5	0.5	random	2.719760657	7.153310073	-2.632620195	2.619112166
*c1cc(F)c(*)cc1F	*c1cc(*)cc(CC(=O)O)c1	0.5	0.5	alternating	2.307487307	6.848431006	-3.011911678	2.341672216
*c1cc(F)c(*)cc1F	*c1cc(*)cc(CC(=O)O)c1	0.5	0.5	block	2.467097547	6.843377361	-2.865070256	2.337073398
*c1cc(F)c(*)cc1F	*c1cc(*)cc(CC(=O)O)c1	0.5	0.5	random	2.377526758	6.851890712	-2.947475383	2.344820548
*c1cc(F)c(*)cc1F	*c1ccccc1*	0.5	0.5	alternating	2.103139144	6.772684958	-3.199911988	2.272743312
*c1cc(F)c(*)cc1F	*c1ccccc1*	0.5	0.5	block	2.399349469	6.708961201	-2.927398488	2.214754693
*c1cc(F)c(*)cc1F	*c1ccccc1*	0.5	0.5	random	2.216874247	6.767901122	-3.095275693	2.268390021
*c1cc(F)c(*)cc1F	*c1nc(C(=O)OC)c(*)s1	0.5	0.5	alternating	3.586156537	6.795657949	-1.835535986	2.293648733
*c1cc(F)c(*)cc1F	*c1nc(C(=O)OC)c(*)s1	0.5	0.5	block	3.732879445	6.840095318	-1.700550911	2.33408674
*c1cc(F)c(*)cc1F	*c1nc(C(=O)OC)c(*)s1	0.5	0.5	random	3.618423962	6.824879969	-1.805849955	2.320240772
*c1cc(F)c(*)cc1F	*c1c(N)cc(Cl)c(*)c1Cl	0.5	0.5	alternating	1.803299383	6.16857777	-3.475764568	1.723005771
*c1cc(F)c(*)cc1F	*c1c(N)cc(Cl)c(*)c1Cl	0.5	0.5	block	2.367880996	6.22824567	-2.956349484	1.77730356
*c1cc(F)c(*)cc1F	*c1c(N)cc(Cl)c(*)c1Cl	0.5	0.5	random	2.073791153	6.1779799	-3.226912139	1.731561709
*c1cc(F)c(*)cc1F	*c1cnc(OC)c(*)c1	0.5	0.5	alternating	2.25842069	6.441397347	-3.057052965	1.971271586
*c1cc(F)c(*)cc1F	*c1cnc(OC)c(*)c1	0.5	0.5	block	2.429240598	6.391816559	-2.899898649	1.926153068
*c1cc(F)c(*)cc1F	*c1cnc(OC)c(*)c1	0.5	0.5	random	2.350465784	6.415520501	-2.972371479	1.947723656
*c1cc(F)c(*)cc1F	*c1cnc(*)cn1	0.5	0.5	alternating	3.293779478	6.657178271	-2.10452288	2.167632227
*c1cc(F)c(*)cc1F	*c1cnc(*)cn1	0.5	0.5	block	3.415217494	6.542382763	-1.992799906	2.063168314
*c1cc(F)c(*)cc1F	*c1cnc(*)cn1	0.5	0.5	random	3.336305964	6.610983081	-2.065398513	2.125594604
*c1cc(F)c(*)cc1F	*c1ncc(*)c(C)n1	0.5	0.5	alternating	2.981355143	6.786540445	-2.391953268	2.285351805
*c1cc(F)c(*)cc1F	*c1ncc(*)c(C)n1	0.5	0.5	block	3.017552075	6.787897031	-2.358652091	2.286586299
*c1cc(F)c(*)cc1F	*c1ncc(*)c(C)n1	0.5	0.5	random	2.962052186	6.778578797	-2.409711989	2.278106705
*c1cc(F)c(*)cc1F	*c1ccc(CO)c(*)c1	0.5	0.5	alternating	2.122396559	6.753913118	-3.182195166	2.255660938
*c1cc(F)c(*)cc1F	*c1ccc(CO)c(*)c1	0.5	0.5	block	2.345285212	6.753919796	-2.977137605	2.255667014
*c1cc(F)c(*)cc1F	*c1ccc(CO)c(*)c1	0.5	0.5	random	2.196810265	6.766091145	-3.113734556	2.266742942
*c1cc(F)c(*)cc1F	*c1nc(C(=O)OCC)c(*)s1	0.5	0.5	alternating	3.568562379	6.769719625	-1.851722611	2.270044858
*c1cc(F)c(*)cc1F	*c1nc(C(=O)OCC)c(*)s1	0.5	0.5	block	3.702948482	6.803123184	-1.728087396	2.300442097
*c1cc(F)c(*)cc1F	*c1nc(C(=O)OCC)c(*)s1	0.5	0.5	random	3.619905205	6.768158848	-1.804487211	2.268624551
*c1cc(F)c(*)cc1F	*c1cc(*)c(Cl)c(C(F)(F)F)c1	0.5	0.5	alternating	2.749351559	7.208665451	-2.605396566	2.669485561
*c1cc(F)c(*)cc1F	*c1cc(*)c(Cl)c(C(F)(F)F)c1	0.5	0.5	block	2.774364555	7.166956279	-2.582384609	2.631530214
*c1cc(F)c(*)cc1F	*c1cc(*)c(Cl)c(C(F)(F)F)c1	0.5	0.5	random	2.748098381	7.214858513	-2.60654949	2.675121247
*c1cc(F)c(*)cc1F	*c1cc(C(C)(C)C)c(*)cc1C(C)(C)C	0.5	0.5	alternating	2.071379458	7.019978517	-3.229130899	2.49778045
*c1cc(F)c(*)cc1F	*c1cc(C(C)(C)C)c(*)cc1C(C)(C)C	0.5	0.5	block	2.402206814	6.824574809	-2.924769731	2.319963076
*c1cc(F)c(*)cc1F	*c1cc(C(C)(C)C)c(*)cc1C(C)(C)C	0.5	0.5	random	2.185197015	6.932396388	-3.124418747	2.418080713
*c1cc(F)c(*)cc1F	*c1cncc(*)c1N	0.5	0.5	alternating	1.857317952	6.119634105	-3.426067484	1.678467036
*c1cc(F)c(*)cc1F	*c1cncc(*)c1N	0.5	0.5	block	2.27309158	6.036204759	-3.043555747	1.60254633
*c1cc(F)c(*)cc1F	*c1cncc(*)c1N	0.5	0.5	random	2.027564703	6.085360133	-3.269440474	1.647277721
*c1cc(F)c(*)cc1F	*c1cc(*)cc(OC(F)(F)F)c1	0.5	0.5	alternating	2.656741084	7.135961741	-2.690598203	2.603325184
*c1cc(F)c(*)cc1F	*c1cc(*)cc(OC(F)(F)F)c1	0.5	0.5	block	2.721482522	7.076596909	-2.63103608	2.549303187
*c1cc(F)c(*)cc1F	*c1cc(*)cc(OC(F)(F)F)c1	0.5	0.5	random	2.682947352	7.113536268	-2.666488436	2.582918004
*c1cc(F)c(*)cc1F	*c1cc(OC)cc(*)c1O	0.5	0.5	alternating	2.108315071	6.047950955	-3.195150135	1.613235369
*c1cc(F)c(*)cc1F	*c1cc(OC)cc(*)c1O	0.5	0.5	block	2.36596387	6.0907021	-2.95811324	1.652138911
*c1cc(F)c(*)cc1F	*c1cc(OC)cc(*)c1O	0.5	0.5	random	2.25025358	6.064074421	-3.064566707	1.627907723
*c1cc(F)c(*)cc1F	*c1cc(C)c(C)c(*)c1N	0.5	0.5	alternating	1.546141865	5.654512805	-3.712349485	1.255206652
*c1cc(F)c(*)cc1F	*c1cc(C)c(C)c(*)c1N	0.5	0.5	block	2.262792163	5.52620417	-3.05303121	1.138445794
*c1cc(F)c(*)cc1F	*c1cc(C)c(C)c(*)c1N	0.5	0.5	random	1.896048635	5.61386074	-3.390435255	1.218213274
*c1cc(F)c(*)cc1F	*c1cc(*)c(N)c(CN(C)C2CCCCC2)c1	0.5	0.5	alternating	1.617589594	5.501440809	-3.646617573	1.115911136
*c1cc(F)c(*)cc1F	*c1cc(*)c(N)c(CN(C)C2CCCCC2)c1	0.5	0.5	block	2.218540121	5.247292606	-3.093743088	0.884636271
*c1cc(F)c(*)cc1F	*c1cc(*)c(N)c(CN(C)C2CCCCC2)c1	0.5	0.5	random	1.86616934	5.391482572	-3.417924207	1.01584914
*c1cc(F)c(*)cc1F	*c1cc(C(=O)OCC)c(*)s1	0.5	0.5	alternating	3.254309968	6.419674865	-2.140834829	1.951504127
*c1cc(F)c(*)cc1F	*c1cc(C(=O)OCC)c(*)s1	0.5	0.5	block	3.265850622	6.317481372	-2.130217427	1.858508049
*c1cc(F)c(*)cc1F	*c1cc(C(=O)OCC)c(*)s1	0.5	0.5	random	3.251389182	6.364051985	-2.143521953	1.900887306
*c1cc(F)c(*)cc1F	*c1ccccc1-c1ccccc1*	0.5	0.5	alternating	2.131381374	6.632988109	-3.173929136	2.145619179
*c1cc(F)c(*)cc1F	*c1ccccc1-c1ccccc1*	0.5	0.5	block	2.41360581	6.535613941	-2.914282655	2.057008687
*c1cc(F)c(*)cc1F	*c1ccccc1-c1ccccc1*	0.5	0.5	random	2.22104287	6.598717968	-3.09144056	2.114433351
*c1cc(F)c(*)cc1F	*c1cc(C)cc(*)c1C	0.5	0.5	alternating	1.747803174	6.767005205	-3.52682108	2.267574736
*c1cc(F)c(*)cc1F	*c1cc(C)cc(*)c1C	0.5	0.5	block	2.31716267	6.693471197	-3.003010343	2.200658789
*c1cc(F)c(*)cc1F	*c1cc(C)cc(*)c1C	0.5	0.5	random	1.995292884	6.748241352	-3.299130547	2.250499631
*c1cc(F)c(*)cc1F	*c1cc([N+](=O)[O-])c(*)cc1F	0.5	0.5	alternating	3.694122542	7.369587891	-1.736207262	2.815924981
*c1cc(F)c(*)cc1F	*c1cc([N+](=O)[O-])c(*)cc1F	0.5	0.5	block	3.841920844	7.268839641	-1.600232824	2.724244073
*c1cc(F)c(*)cc1F	*c1cc([N+](=O)[O-])c(*)cc1F	0.5	0.5	random	3.772382494	7.331229026	-1.664208105	2.781018414
*c1cc(F)c(*)cc1F	*c1ccc2c(c1)c1cc(*)ccc1n2CC(O)CNc1ccccc1	0.5	0.5	alternating	1.821447097	5.379245871	-3.459068671	1.004713742
*c1cc(F)c(*)cc1F	*c1ccc2c(c1)c1cc(*)ccc1n2CC(O)CNc1ccccc1	0.5	0.5	block	2.323009334	5.201982185	-2.997631413	0.843403788
*c1cc(F)c(*)cc1F	*c1ccc2c(c1)c1cc(*)ccc1n2CC(O)CNc1ccccc1	0.5	0.5	random	1.989784172	5.330991205	-3.304198562	0.960801997
*c1cc(F)c(*)cc1F	*c1cnc2c(*)cnn2c1	0.5	0.5	alternating	2.576198043	5.96109134	-2.7646978	1.53419312
*c1cc(F)c(*)cc1F	*c1cnc2c(*)cnn2c1	0.5	0.5	block	2.579551637	5.772714522	-2.761612494	1.362770215
*c1cc(F)c(*)cc1F	*c1cnc2c(*)cnn2c1	0.5	0.5	random	2.551169162	5.829940847	-2.787724371	1.414846171
*c1cc(F)c(*)cc1F	*c1cc(*)c(=O)[nH]c1Cl	0.5	0.5	alternating	2.760266926	6.356768225	-2.595354428	1.894259084
*c1cc(F)c(*)cc1F	*c1cc(*)c(=O)[nH]c1Cl	0.5	0.5	block	2.763116249	6.32449566	-2.592733051	1.864891051
*c1cc(F)c(*)cc1F	*c1cc(*)c(=O)[nH]c1Cl	0.5	0.5	random	2.75120613	6.335676512	-2.60369036	1.875065626
*c1cc(F)c(*)cc1F	*c1ccc2[nH]c3c([N+](=O)[O-])cc(*)cc3c2c1	0.5	0.5	alternating	3.423316117	6.223263524	-1.985349172	1.772769807
*c1cc(F)c(*)cc1F	*c1ccc2[nH]c3c([N+](=O)[O-])cc(*)cc3c2c1	0.5	0.5	block	3.359012886	6.123502576	-2.044508145	1.681987344
*c1cc(F)c(*)cc1F	*c1ccc2[nH]c3c([N+](=O)[O-])cc(*)cc3c2c1	0.5	0.5	random	3.400836059	6.181955396	-2.006030826	1.73517941
*c1cc(F)c(*)cc1F	*c1cccc(*)c1C(F)(F)F	0.5	0.5	alternating	2.339283721	7.264047785	-2.982658977	2.719883485
*c1cc(F)c(*)cc1F	*c1cccc(*)c1C(F)(F)F	0.5	0.5	block	2.633853264	7.157723	-2.711654997	2.62312793
*c1cc(F)c(*)cc1F	*c1cccc(*)c1C(F)(F)F	0.5	0.5	random	2.465975926	7.206821992	-2.866102148	2.667808013
*c1cc(F)c(*)cc1F	*c1cnc(*)c(Cl)c1	0.5	0.5	alternating	2.782585093	7.012034983	-2.574821714	2.490551834
*c1cc(F)c(*)cc1F	*c1cnc(*)c(Cl)c1	0.5	0.5	block	2.873763886	6.957625095	-2.490937225	2.441038837
*c1cc(F)c(*)cc1F	*c1cnc(*)c(Cl)c1	0.5	0.5	random	2.80782296	7.001476262	-2.551602876	2.480943399
*c1cc(F)c(*)cc1F	*c1cc(*)c(N)c(OC)c1	0.5	0.5	alternating	1.739380998	5.44010356	-3.534569482	1.060094239
*c1cc(F)c(*)cc1F	*c1cc(*)c(N)c(OC)c1	0.5	0.5	block	2.279375827	5.254055598	-3.037774239	0.890790594
*c1cc(F)c(*)cc1F	*c1cc(*)c(N)c(OC)c1	0.5	0.5	random	1.988156745	5.335877906	-3.305695795	0.965248895
*c1cc(F)c(*)cc1F	*c1ccc2c3ccc(*)cc3n(CC)c2c1	0.5	0.5	alternating	2.181281274	5.761361498	-3.128021228	1.352438963
*c1cc(F)c(*)cc1F	*c1ccc2c3ccc(*)cc3n(CC)c2c1	0.5	0.5	block	2.371471309	5.597908306	-2.953046396	1.203696559
*c1cc(F)c(*)cc1F	*c1ccc2c3ccc(*)cc3n(CC)c2c1	0.5	0.5	random	2.242129431	5.703586626	-3.072040924	1.29986383
*c1cc(F)c(*)cc1F	*c1cc(*)c(F)nc1C	0.5	0.5	alternating	2.407829322	6.977631908	-2.919597023	2.459245036
*c1cc(F)c(*)cc1F	*c1cc(*)c(F)nc1C	0.5	0.5	block	2.510187372	6.969634171	-2.825427617	2.451967096
*c1cc(F)c(*)cc1F	*c1cc(*)c(F)nc1C	0.5	0.5	random	2.470653476	6.966035746	-2.861798802	2.448692529
*c1cc(F)c(*)cc1F	*c1sc(*)c(C(=O)O)c1C(=O)O	0.5	0.5	alternating	3.565816603	7.02668977	-1.854248725	2.503887691
*c1cc(F)c(*)cc1F	*c1sc(*)c(C(=O)O)c1C(=O)O	0.5	0.5	block	3.936267665	6.994329607	-1.513433748	2.474439943
*c1cc(F)c(*)cc1F	*c1sc(*)c(C(=O)O)c1C(=O)O	0.5	0.5	random	3.691924677	7.003624854	-1.738229297	2.482898617
*c1cc(F)c(*)cc1F	*c1cc(*)c(N)c(C(C)C)c1	0.5	0.5	alternating	1.68503959	5.610626838	-3.584563578	1.215270422
*c1cc(F)c(*)cc1F	*c1cc(*)c(N)c(C(C)C)c1	0.5	0.5	block	2.267065477	5.413958346	-3.049099761	1.036302095
*c1cc(F)c(*)cc1F	*c1cc(*)c(N)c(C(C)C)c1	0.5	0.5	random	1.938811132	5.550169819	-3.351093758	1.160254536
*c1cc(F)c(*)cc1F	*c1cc(F)cc(*)c1OC	0.5	0.5	alternating	2.256113342	6.667758995	-3.059175725	2.177260686
*c1cc(F)c(*)cc1F	*c1cc(F)cc(*)c1OC	0.5	0.5	block	2.422305937	6.728177474	-2.906278538	2.232241501
*c1cc(F)c(*)cc1F	*c1cc(F)cc(*)c1OC	0.5	0.5	random	2.39597559	6.752880811	-2.930502458	2.254721538
*c1cc(F)c(*)cc1F	*c1cc2c(*)[nH]nc2cn1	0.5	0.5	alternating	2.883556385	6.013973632	-2.481928126	1.582316006
*c1cc(F)c(*)cc1F	*c1cc2c(*)[nH]nc2cn1	0.5	0.5	block	2.783769751	5.779397375	-2.573731829	1.368851612
*c1cc(F)c(*)cc1F	*c1cc2c(*)[nH]nc2cn1	0.5	0.5	random	2.858783169	5.932634591	-2.504719484	1.508297477
*c1cc(F)c(*)cc1F	*c1cc2[nH]cc(*)c2cn1	0.5	0.5	alternating	2.055758013	5.731572752	-3.243502628	1.325331204
*c1cc(F)c(*)cc1F	*c1cc2[nH]cc(*)c2cn1	0.5	0.5	block	2.2940071	5.395510616	-3.024313468	1.019514661
*c1cc(F)c(*)cc1F	*c1cc2[nH]cc(*)c2cn1	0.5	0.5	random	2.166848079	5.600855444	-3.141299767	1.206378454
*c1cc(F)c(*)cc1F	*c1cnc(*)c2c(C(=O)O)c[nH]c12	0.5	0.5	alternating	2.695506189	6.389991331	-2.654934306	1.924492111
*c1cc(F)c(*)cc1F	*c1cnc(*)c2c(C(=O)O)c[nH]c12	0.5	0.5	block	2.731649328	6.277624101	-2.621682618	1.822237932
*c1cc(F)c(*)cc1F	*c1cnc(*)c2c(C(=O)O)c[nH]c12	0.5	0.5	random	2.730113795	6.344557935	-2.623095308	1.883147721
*c1cc(F)c(*)cc1F	*c1cc(C)c(*)cn1	0.5	0.5	alternating	2.512027452	6.767422435	-2.823734744	2.267954416
*c1cc(F)c(*)cc1F	*c1cc(C)c(*)cn1	0.5	0.5	block	2.570372145	6.697211625	-2.770057627	2.204062579
*c1cc(F)c(*)cc1F	*c1cc(C)c(*)cn1	0.5	0.5	random	2.53779505	6.741492494	-2.800028554	2.24435817
*c1cc(F)c(*)cc1F	*c1cc(CO)c(*)cn1	0.5	0.5	alternating	2.63259869	6.811862858	-2.712809205	2.308395201
*c1cc(F)c(*)cc1F	*c1cc(CO)c(*)cn1	0.5	0.5	block	2.683254083	6.762414666	-2.666206243	2.263397347
*c1cc(F)c(*)cc1F	*c1cc(CO)c(*)cn1	0.5	0.5	random	2.627132444	6.786760341	-2.717838151	2.28555191
*c1cc(F)c(*)cc1F	*c1cc(*)c(C)s1	0.5	0.5	alternating	2.436253735	5.958225092	-2.893446564	1.531584834
*c1cc(F)c(*)cc1F	*c1cc(*)c(C)s1	0.5	0.5	block	2.45121949	5.699702102	-2.879678069	1.296328913
*c1cc(F)c(*)cc1F	*c1cc(*)c(C)s1	0.5	0.5	random	2.388693599	5.855542964	-2.937201889	1.438144098
*c1cc(F)c(*)cc1F	*c1ccc(CC#N)c(*)c1	0.5	0.5	alternating	2.177592879	6.876640296	-3.131414552	2.36734267
*c1cc(F)c(*)cc1F	*c1ccc(CC#N)c(*)c1	0.5	0.5	block	2.36089359	6.87179366	-2.962777897	2.362932231
*c1cc(F)c(*)cc1F	*c1ccc(CC#N)c(*)c1	0.5	0.5	random	2.267134204	6.897703925	-3.049036533	2.386510571
*c1cc(F)c(*)cc1F	*c1cc(*)c(Cl)c(C(C)C)c1	0.5	0.5	alternating	2.360926119	6.876265237	-2.962747971	2.367001366
*c1cc(F)c(*)cc1F	*c1cc(*)c(Cl)c(C(C)C)c1	0.5	0.5	block	2.478182484	6.862574627	-2.854872114	2.354542911
*c1cc(F)c(*)cc1F	*c1cc(*)c(Cl)c(C(C)C)c1	0.5	0.5	random	2.405027921	6.851505468	-2.922174312	2.344469976
*c1cc(F)c(*)cc1F	*c1cnc(C)c(*)c1C	0.5	0.5	alternating	1.950952472	6.839287615	-3.339923725	2.333351729
*c1cc(F)c(*)cc1F	*c1cnc(C)c(*)c1C	0.5	0.5	block	2.329443274	6.787323615	-2.991712188	2.28606449
*c1cc(F)c(*)cc1F	*c1cnc(C)c(*)c1C	0.5	0.5	random	2.141996569	6.81198291	-3.164163156	2.308504448
*c1cc(F)c(*)cc1F	*c1cc(Cl)c(N)c(*)c1Cl	0.5	0.5	alternating	2.0030526	6.089364107	-3.291991608	1.650921337
*c1cc(F)c(*)cc1F	*c1cc(Cl)c(N)c(*)c1Cl	0.5	0.5	block	2.380086871	6.150733453	-2.945120079	1.706767442
*c1cc(F)c(*)cc1F	*c1cc(Cl)c(N)c(*)c1Cl	0.5	0.5	random	2.184936714	6.124168147	-3.124658223	1.682593014
*c1cc(F)c(*)cc1F	*c1cc(*)c2c(c1)C(=O)C(=O)N2CC	0.5	0.5	alternating	3.865977818	6.678782096	-1.578100407	2.187291708
*c1cc(F)c(*)cc1F	*c1cc(*)c2c(c1)C(=O)C(=O)N2CC	0.5	0.5	block	3.84201476	6.723294935	-1.600146421	2.227798391
*c1cc(F)c(*)cc1F	*c1cc(*)c2c(c1)C(=O)C(=O)N2CC	0.5	0.5	random	3.858786613	6.695759958	-1.584716316	2.202741561
*c1cc(F)c(*)cc1F	*c1cc(OC)c(N)c(*)c1Cl	0.5	0.5	alternating	1.792354769	5.696286494	-3.485833613	1.293220709
*c1cc(F)c(*)cc1F	*c1cc(OC)c(N)c(*)c1Cl	0.5	0.5	block	2.32961327	5.693448265	-2.991555792	1.290637921
*c1cc(F)c(*)cc1F	*c1cc(OC)c(N)c(*)c1Cl	0.5	0.5	random	2.056694385	5.69453956	-3.242641166	1.291630999
*c1cc(F)c(*)cc1F	*c1cc(*)c(N)c(C#N)c1	0.5	0.5	alternating	2.089461875	5.877008684	-3.212495075	1.457677903
*c1cc(F)c(*)cc1F	*c1cc(*)c(N)c(C#N)c1	0.5	0.5	block	2.324716459	5.742164321	-2.996060857	1.334969532
*c1cc(F)c(*)cc1F	*c1cc(*)c(N)c(C#N)c1	0.5	0.5	random	2.181480639	5.809025848	-3.127837812	1.395813522
*c1cc(F)c(*)cc1F	*c1cc(CC)c(*)s1	0.5	0.5	alternating	2.788707228	5.963004262	-2.56918935	1.535933878
*c1cc(F)c(*)cc1F	*c1cc(CC)c(*)s1	0.5	0.5	block	2.770619022	5.508106907	-2.5858305	1.121977286
*c1cc(F)c(*)cc1F	*c1cc(CC)c(*)s1	0.5	0.5	random	2.802035911	5.760267303	-2.556926962	1.351443246
*c1cc(F)c(*)cc1F	*c1c(C)nc(C)c(*)c1C	0.5	0.5	alternating	1.723260615	6.865334368	-3.549400234	2.357054275
*c1cc(F)c(*)cc1F	*c1c(C)nc(C)c(*)c1C	0.5	0.5	block	2.332914671	6.765127913	-2.988518503	2.265866401
*c1cc(F)c(*)cc1F	*c1c(C)nc(C)c(*)c1C	0.5	0.5	random	2.025264157	6.821798632	-3.271556975	2.317436755
*c1cc(F)c(*)cc1F	*c1cccc(*)c1-c1cc2cnc(N)nc2nc1N	0.5	0.5	alternating	2.397566726	5.91160368	-2.929038612	1.489159349
*c1cc(F)c(*)cc1F	*c1cccc(*)c1-c1cc2cnc(N)nc2nc1N	0.5	0.5	block	2.500340652	5.883562192	-2.8344866	1.463641595
*c1cc(F)c(*)cc1F	*c1cccc(*)c1-c1cc2cnc(N)nc2nc1N	0.5	0.5	random	2.457655326	5.899296657	-2.8737571	1.477959958
*c1cc(F)c(*)cc1F	*c1ccc(*)cc1	0.5	0.5	alternating	2.339745908	6.555010151	-2.982233765	2.074659238
*c1cc(F)c(*)cc1F	*c1ccc(*)cc1	0.5	0.5	block	2.441960943	6.433792795	-2.888195932	1.964351443
*c1cc(F)c(*)cc1F	*c1ccc(*)cc1	0.5	0.5	random	2.353467558	6.511327822	-2.969609847	2.034908318
*c1cc(F)c(*)cc1F	*c1cc(*)c(C)c([N+](=O)[O-])c1	0.5	0.5	alternating	3.500196665	7.235491275	-1.914619068	2.69389706
*c1cc(F)c(*)cc1F	*c1cc(*)c(C)c([N+](=O)[O-])c1	0.5	0.5	block	3.51537911	7.175136101	-1.900651219	2.638973852
*c1cc(F)c(*)cc1F	*c1cc(*)c(C)c([N+](=O)[O-])c1	0.5	0.5	random	3.512071709	7.230964445	-1.903694027	2.689777645
*c1cc(F)c(*)cc1F	*c1cc(*)c(C)cc1C	0.5	0.5	alternating	1.778602464	6.684869987	-3.498485733	2.192831688
*c1cc(F)c(*)cc1F	*c1cc(*)c(C)cc1C	0.5	0.5	block	2.316904998	6.632333402	-3.003247402	2.145023396
*c1cc(F)c(*)cc1F	*c1cc(*)c(C)cc1C	0.5	0.5	random	2.009850594	6.691693432	-3.285737453	2.199041023
*c1cc(F)c(*)cc1F	*c1cc(Cl)cc(*)c1[N+](=O)[O-]	0.5	0.5	alternating	3.774851406	7.54892485	-1.661936707	2.979121613
*c1cc(F)c(*)cc1F	*c1cc(Cl)cc(*)c1[N+](=O)[O-]	0.5	0.5	block	4.080153577	7.314920754	-1.381058709	2.766177886
*c1cc(F)c(*)cc1F	*c1cc(Cl)cc(*)c1[N+](=O)[O-]	0.5	0.5	random	3.908811715	7.445045354	-1.538693222	2.884591272
*c1cc(F)c(*)cc1F	*c1cc(*)c(C(=O)O)c(N)c1	0.5	0.5	alternating	2.554619275	6.080122172	-2.784550267	1.642511176
*c1cc(F)c(*)cc1F	*c1cc(*)c(C(=O)O)c(N)c1	0.5	0.5	block	2.575331223	6.100148794	-2.765495275	1.660735402
*c1cc(F)c(*)cc1F	*c1cc(*)c(C(=O)O)c(N)c1	0.5	0.5	random	2.556388481	6.086323503	-2.782922597	1.648154388
*c1cc(F)c(*)cc1F	*c1cnc(N)c(*)c1C	0.5	0.5	alternating	1.705983721	5.956282357	-3.565294977	1.529816945
*c1cc(F)c(*)cc1F	*c1cnc(N)c(*)c1C	0.5	0.5	block	2.260265478	5.903888596	-3.05535576	1.482138623
*c1cc(F)c(*)cc1F	*c1cnc(N)c(*)c1C	0.5	0.5	random	1.957086861	5.941110167	-3.334280088	1.516010252
*c1cc(F)c(*)cc1F	*c1cc(F)c(F)c(*)c1N	0.5	0.5	alternating	1.992855008	6.004831777	-3.301373393	1.573996917
*c1cc(F)c(*)cc1F	*c1cc(F)c(F)c(*)c1N	0.5	0.5	block	2.320591556	6.022771454	-2.999855769	1.590322023
*c1cc(F)c(*)cc1F	*c1cc(F)c(F)c(*)c1N	0.5	0.5	random	2.130174848	6.015586386	-3.17503914	1.583783611
*c1cc(F)c(*)cc1F	*c1cc(Cl)cc(*)c1Cl	0.5	0.5	alternating	2.402006643	7.146081	-2.924953888	2.61253371
*c1cc(F)c(*)cc1F	*c1cc(Cl)cc(*)c1Cl	0.5	0.5	block	2.572556512	7.128045473	-2.768048009	2.59612138
*c1cc(F)c(*)cc1F	*c1cc(Cl)cc(*)c1Cl	0.5	0.5	random	2.476325368	7.1506903	-2.856580662	2.616728173
*c1cc(F)c(*)cc1F	*c1cc(*)c(N)c([N+]([O-])=NC)c1	0.5	0.5	alternating	2.723571442	5.928572593	-2.629114273	1.50460106
*c1cc(F)c(*)cc1F	*c1cc(*)c(N)c([N+]([O-])=NC)c1	0.5	0.5	block	2.713880707	5.816425311	-2.638029749	1.402547033
*c1cc(F)c(*)cc1F	*c1cc(*)c(N)c([N+]([O-])=NC)c1	0.5	0.5	random	2.729476534	5.886571204	-2.623681589	1.466379796
*c1cc(F)c(*)cc1F	*c1cc2sc3cc(*)sc3c2s1	0.5	0.5	alternating	3.191569215	5.453586785	-2.198556323	1.072363974
*c1cc(F)c(*)cc1F	*c1cc2sc3cc(*)sc3c2s1	0.5	0.5	block	3.055077583	5.177029798	-2.324128623	0.820697116
*c1cc(F)c(*)cc1F	*c1cc2sc3cc(*)sc3c2s1	0.5	0.5	random	3.136893708	5.357725774	-2.248857788	0.985130454
*c1cc(F)c(*)cc1F	*c1cc(*)c(C=O)cn1	0.5	0.5	alternating	3.530551431	7.081594064	-1.886692684	2.553850598
*c1cc(F)c(*)cc1F	*c1cc(*)c(C=O)cn1	0.5	0.5	block	3.602184501	7.017062368	-1.820790259	2.495126755
*c1cc(F)c(*)cc1F	*c1cc(*)c(C=O)cn1	0.5	0.5	random	3.581129619	7.054538867	-1.84016075	2.529230369
*c1cc(F)c(*)cc1F	*c1cnc2[nH]cc(*)c2c1	0.5	0.5	alternating	2.102070675	5.957412088	-3.200894979	1.530845
*c1cc(F)c(*)cc1F	*c1cnc2[nH]cc(*)c2c1	0.5	0.5	block	2.32309652	5.745533706	-2.997551201	1.338035672
*c1cc(F)c(*)cc1F	*c1cnc2[nH]cc(*)c2c1	0.5	0.5	random	2.165216985	5.87853867	-3.142800373	1.45907019
*c1cc(F)c(*)cc1F	*c1cnc(Cl)c(*)n1	0.5	0.5	alternating	3.187942051	6.943672543	-2.201893313	2.428342014
*c1cc(F)c(*)cc1F	*c1cnc(Cl)c(*)n1	0.5	0.5	block	3.155965787	6.841690027	-2.231311476	2.335537925
*c1cc(F)c(*)cc1F	*c1cnc(Cl)c(*)n1	0.5	0.5	random	3.158843834	6.886836896	-2.228663672	2.376621575
*c1cc(F)c(*)cc1F	*c1c(F)cc(F)c(*)c1[N+](=O)[O-]	0.5	0.5	alternating	3.806603559	7.562745225	-1.632724726	2.991698155
*c1cc(F)c(*)cc1F	*c1c(F)cc(F)c(*)c1[N+](=O)[O-]	0.5	0.5	block	4.107019679	7.345839743	-1.356341895	2.794314166
*c1cc(F)c(*)cc1F	*c1c(F)cc(F)c(*)c1[N+](=O)[O-]	0.5	0.5	random	3.952990942	7.469695565	-1.498048333	2.907022964
*c1cc(F)c(*)cc1F	*c1cc(*)nc(N)c1	0.5	0.5	alternating	2.35476929	5.97318765	-2.968412254	1.545200761
*c1cc(F)c(*)cc1F	*c1cc(*)nc(N)c1	0.5	0.5	block	2.428187133	5.897099927	-2.900867838	1.475960934
*c1cc(F)c(*)cc1F	*c1cc(*)nc(N)c1	0.5	0.5	random	2.377007901	5.960789854	-2.947952731	1.533918767
*c1cc(F)c(*)cc1F	*c1cc(C)cc(*)c1NCC(=O)NN	0.5	0.5	alternating	1.83021125	5.568562483	-3.45100565	1.176991859
*c1cc(F)c(*)cc1F	*c1cc(C)cc(*)c1NCC(=O)NN	0.5	0.5	block	2.298850681	5.428467402	-3.019857373	1.049505336
*c1cc(F)c(*)cc1F	*c1cc(C)cc(*)c1NCC(=O)NN	0.5	0.5	random	1.977856777	5.594152872	-3.315171765	1.200279113
*c1cc(F)c(*)cc1F	*c1cc(Cl)c(N)c(*)c1C(=O)OC	0.5	0.5	alternating	2.418829088	6.170848957	-2.909477239	1.725072551
*c1cc(F)c(*)cc1F	*c1cc(Cl)c(N)c(*)c1C(=O)OC	0.5	0.5	block	2.596745507	6.252757179	-2.745794133	1.799609033
*c1cc(F)c(*)cc1F	*c1cc(Cl)c(N)c(*)c1C(=O)OC	0.5	0.5	random	2.502516736	6.224918208	-2.832484602	1.77427557
*c1cc(F)c(*)cc1F	*c1ccnc(*)c1	0.5	0.5	alternating	2.67749324	6.96998265	-2.671506219	2.452284211
*c1cc(F)c(*)cc1F	*c1ccnc(*)c1	0.5	0.5	block	2.662401239	6.87415629	-2.68539086	2.365082224
*c1cc(F)c(*)cc1F	*c1ccnc(*)c1	0.5	0.5	random	2.670478887	6.928000014	-2.677959424	2.414080012
*c1cc(F)c(*)cc1F	*c1cc(*)c(N)c(CC)c1	0.5	0.5	alternating	1.653438584	5.572880595	-3.613636503	1.180921341
*c1cc(F)c(*)cc1F	*c1cc(*)c(N)c(CC)c1	0.5	0.5	block	2.256034316	5.370902528	-3.059248429	0.997121301
*c1cc(F)c(*)cc1F	*c1cc(*)c(N)c(CC)c1	0.5	0.5	random	1.920461039	5.518935604	-3.367975844	1.1318314
*c1cc(F)c(*)cc1F	*c1cc(*)c(Cl)cc1F	0.5	0.5	alternating	2.524770745	7.026612467	-2.812010914	2.503817345
*c1cc(F)c(*)cc1F	*c1cc(*)c(Cl)cc1F	0.5	0.5	block	2.572631471	7.031922009	-2.767979047	2.508649028
*c1cc(F)c(*)cc1F	*c1cc(*)c(Cl)cc1F	0.5	0.5	random	2.528851096	7.031771547	-2.808256992	2.508512107
*c1cc(F)c(*)cc1F	*c1cc(CCCC)cc(*)c1N	0.5	0.5	alternating	1.664930863	5.665048723	-3.603063606	1.264794338
*c1cc(F)c(*)cc1F	*c1cc(CCCC)cc(*)c1N	0.5	0.5	block	2.244915219	5.501923845	-3.069477998	1.116350699
*c1cc(F)c(*)cc1F	*c1cc(CCCC)cc(*)c1N	0.5	0.5	random	1.936075207	5.614518292	-3.35361081	1.218811646
*c1cc(F)c(*)cc1F	*c1ccc2c(c1)C(=C(C#N)C#N)c1cc(*)ccc1-2	0.5	0.5	alternating	4.117805601	6.513045027	-1.346418847	2.036470974
*c1cc(F)c(*)cc1F	*c1ccc2c(c1)C(=C(C#N)C#N)c1cc(*)ccc1-2	0.5	0.5	block	4.075418905	6.447209641	-1.385414608	1.976560773
*c1cc(F)c(*)cc1F	*c1ccc2c(c1)C(=C(C#N)C#N)c1cc(*)ccc1-2	0.5	0.5	random	4.103220328	6.482939742	-1.359837298	2.009075165
*c1cc(F)c(*)cc1F	*c1c(F)c(F)c(*)c(F)c1F	0.5	0.5	alternating	2.907119285	7.385866893	-2.460250258	2.830738872
*c1cc(F)c(*)cc1F	*c1c(F)c(F)c(*)c(F)c1F	0.5	0.5	block	2.969057921	7.24589309	-2.403266712	2.703362712
*c1cc(F)c(*)cc1F	*c1c(F)c(F)c(*)c(F)c1F	0.5	0.5	random	2.923972816	7.33288498	-2.444745009	2.782525332
*c1cc(F)c(*)cc1F	*c1cc(*)c(O)c(CBr)c1	0.5	0.5	alternating	2.14505578	6.451566681	-3.161348683	1.980525679
*c1cc(F)c(*)cc1F	*c1cc(*)c(O)c(CBr)c1	0.5	0.5	block	2.406851216	6.455907907	-2.920496882	1.984476195
*c1cc(F)c(*)cc1F	*c1cc(*)c(O)c(CBr)c1	0.5	0.5	random	2.283994667	6.489957186	-3.033524907	2.015461039
*c1cc(F)c(*)cc1F	*c1cc(*)c2c(c1)OCCC2=O	0.5	0.5	alternating	3.04285199	6.784791773	-2.335376169	2.283760514
*c1cc(F)c(*)cc1F	*c1cc(*)c2c(c1)OCCC2=O	0.5	0.5	block	3.020073162	6.821544366	-2.356332691	2.317205373
*c1cc(F)c(*)cc1F	*c1cc(*)c2c(c1)OCCC2=O	0.5	0.5	random	3.048812217	6.80281999	-2.32989276	2.300166191
*c1cc(F)c(*)cc1F	*c1cc(OC(F)F)cc(*)c1Cl	0.5	0.5	alternating	2.496478735	7.07746743	-2.838039564	2.550095361
*c1cc(F)c(*)cc1F	*c1cc(OC(F)F)cc(*)c1Cl	0.5	0.5	block	2.589167455	7.088265084	-2.752765941	2.559921226
*c1cc(F)c(*)cc1F	*c1cc(OC(F)F)cc(*)c1Cl	0.5	0.5	random	2.532814363	7.089892777	-2.804610786	2.561402427
*c1cc(F)c(*)cc1F	*c1sc(*)c([N+](=O)[O-])c1[N+](=O)[O-]	0.5	0.5	alternating	4.166513894	7.48597984	-1.301607217	2.921841655
*c1cc(F)c(*)cc1F	*c1sc(*)c([N+](=O)[O-])c1[N+](=O)[O-]	0.5	0.5	block	4.663192234	7.361019119	-0.844663144	2.808127398
*c1cc(F)c(*)cc1F	*c1sc(*)c([N+](=O)[O-])c1[N+](=O)[O-]	0.5	0.5	random	4.423321726	7.430780072	-1.065344012	2.871609865
*c1cc(F)c(*)cc1F	*c1cc(S(N)(=O)=O)cc(*)c1N	0.5	0.5	alternating	1.795695035	5.825786461	-3.482760568	1.411065679
*c1cc(F)c(*)cc1F	*c1cc(S(N)(=O)=O)cc(*)c1N	0.5	0.5	block	2.269732276	5.704883215	-3.046646307	1.301043726
*c1cc(F)c(*)cc1F	*c1cc(S(N)(=O)=O)cc(*)c1N	0.5	0.5	random	1.974525447	5.768747034	-3.318236588	1.359159801
*c1cc(F)c(*)cc1F	*c1nc(*)n(C)n1	0.5	0.5	alternating	2.463235981	6.745473669	-2.868622898	2.247981039
*c1cc(F)c(*)cc1F	*c1nc(*)n(C)n1	0.5	0.5	block	2.474902096	6.759816843	-2.857890072	2.261033327
*c1cc(F)c(*)cc1F	*c1nc(*)n(C)n1	0.5	0.5	random	2.473882528	6.750484417	-2.858828074	2.252540819
*c1cc(F)c(*)cc1F	*c1cc(C(=O)O)nc(*)c1O	0.5	0.5	alternating	2.944014738	7.058712491	-2.426306441	2.533028367
*c1cc(F)c(*)cc1F	*c1cc(C(=O)O)nc(*)c1O	0.5	0.5	block	3.09999831	6.929479644	-2.282801555	2.415426476
*c1cc(F)c(*)cc1F	*c1cc(C(=O)O)nc(*)c1O	0.5	0.5	random	3.037155871	6.943777297	-2.340616599	2.428437341
*c1cc(F)c(*)cc1F	*c1c(F)c(F)c(-c2c(F)c(F)c(*)c(F)c2F)c(F)c1F	0.5	0.5	alternating	3.174693565	7.413851458	-2.21408192	2.856204827
*c1cc(F)c(*)cc1F	*c1c(F)c(F)c(-c2c(F)c(F)c(*)c(F)c2F)c(F)c1F	0.5	0.5	block	3.202940004	7.262997731	-2.188095196	2.718927935
*c1cc(F)c(*)cc1F	*c1c(F)c(F)c(-c2c(F)c(F)c(*)c(F)c2F)c(F)c1F	0.5	0.5	random	3.185971498	7.352651936	-2.203706222	2.800513262
*c1cc(F)c(*)cc1F	*c1cc(CC(=O)O)cc(*)c1O	0.5	0.5	alternating	2.245679512	6.568154926	-3.068774849	2.086620982
*c1cc(F)c(*)cc1F	*c1cc(CC(=O)O)cc(*)c1O	0.5	0.5	block	2.475414813	6.589427177	-2.857418372	2.105978731
*c1cc(F)c(*)cc1F	*c1cc(CC(=O)O)cc(*)c1O	0.5	0.5	random	2.342931572	6.579982728	-2.979302953	2.097384282
*c1cc(F)c(*)cc1F	*c1c(F)c(F)c(*)c2nsnc12	0.5	0.5	alternating	4.161003293	6.902508435	-1.306676971	2.390882676
*c1cc(F)c(*)cc1F	*c1c(F)c(F)c(*)c2nsnc12	0.5	0.5	block	4.173282821	6.924513749	-1.295379805	2.410907512
*c1cc(F)c(*)cc1F	*c1c(F)c(F)c(*)c2nsnc12	0.5	0.5	random	4.176966835	6.895843307	-1.291990512	2.384817409
*c1cc(F)c(*)cc1F	*c1cc(*)c(C(=O)O)cc1O	0.5	0.5	alternating	2.767899667	6.772329538	-2.588332306	2.272419879
*c1cc(F)c(*)cc1F	*c1cc(*)c(C(=O)O)cc1O	0.5	0.5	block	2.77558198	6.789103691	-2.581264578	2.287684359
*c1cc(F)c(*)cc1F	*c1cc(*)c(C(=O)O)cc1O	0.5	0.5	random	2.783139038	6.794847163	-2.574312085	2.292910918
*c1cc(F)c(*)cc1F	*c1ccnc(*)c1C#N	0.5	0.5	alternating	3.01281939	7.371049366	-2.363006161	2.817254923
*c1cc(F)c(*)cc1F	*c1ccnc(*)c1C#N	0.5	0.5	block	3.046830999	7.161209533	-2.331715481	2.626300675
*c1cc(F)c(*)cc1F	*c1ccnc(*)c1C#N	0.5	0.5	random	3.025452452	7.277003898	-2.351383744	2.731673547
*c1cc(F)c(*)cc1F	*c1ccc(O)c(*)n1	0.5	0.5	alternating	2.365397992	6.376805852	-2.958633848	1.912493325
*c1cc(F)c(*)cc1F	*c1ccc(O)c(*)n1	0.5	0.5	block	2.464811359	6.085313061	-2.86717355	1.647234886
*c1cc(F)c(*)cc1F	*c1ccc(O)c(*)n1	0.5	0.5	random	2.403794714	6.267385046	-2.923308863	1.812920392
*c1cc(F)c(*)cc1F	*c1cc(*)cc(C(=O)OC)c1	0.5	0.5	alternating	2.61481179	7.056767825	-2.729173153	2.531258721
*c1cc(F)c(*)cc1F	*c1cc(*)cc(C(=O)OC)c1	0.5	0.5	block	2.676208873	7.056994937	-2.672687837	2.531465393
*c1cc(F)c(*)cc1F	*c1cc(*)cc(C(=O)OC)c1	0.5	0.5	random	2.643683006	7.053677362	-2.702611634	2.528446399
*c1cc(F)c(*)cc1F	*c1ccc(*)c(O)c1	0.5	0.5	alternating	2.277307528	6.382542235	-3.039677074	1.917713434
*c1cc(F)c(*)cc1F	*c1ccc(*)c(O)c1	0.5	0.5	block	2.406815424	6.306872778	-2.92052981	1.848854228
*c1cc(F)c(*)cc1F	*c1ccc(*)c(O)c1	0.5	0.5	random	2.317994806	6.354869469	-3.002244779	1.892531217
*c1cc(F)c(*)cc1F	*c1nc(C)c(*)n1C	0.5	0.5	alternating	2.159919235	5.957209609	-3.147674304	1.530660745
*c1cc(F)c(*)cc1F	*c1nc(C)c(*)n1C	0.5	0.5	block	2.353136432	5.705048023	-2.969914482	1.301193701
*c1cc(F)c(*)cc1F	*c1nc(C)c(*)n1C	0.5	0.5	random	2.22562476	5.845038827	-3.087225221	1.428585333
*c1cc(F)c(*)cc1F	*c1c2ccccc2c(*)c2ccccc12	0.5	0.5	alternating	2.811070511	5.841175933	-2.54861513	1.425070099
*c1cc(F)c(*)cc1F	*c1c2ccccc2c(*)c2ccccc12	0.5	0.5	block	2.729548372	5.82183611	-2.623615498	1.40747086
*c1cc(F)c(*)cc1F	*c1c2ccccc2c(*)c2ccccc12	0.5	0.5	random	2.769888581	5.835264371	-2.586502506	1.419690577
*c1cc(F)c(*)cc1F	*c1ccc(N=C=S)c(*)c1	0.5	0.5	alternating	2.708055532	6.448985117	-2.643388911	1.978176456
*c1cc(F)c(*)cc1F	*c1ccc(N=C=S)c(*)c1	0.5	0.5	block	2.711616737	6.425889036	-2.640112602	1.957159023
*c1cc(F)c(*)cc1F	*c1ccc(N=C=S)c(*)c1	0.5	0.5	random	2.71433279	6.44170835	-2.637613833	1.971554598
*c1cc(F)c(*)cc1F	*c1ccc(C(=O)O)nc1*	0.5	0.5	alternating	3.133824316	7.279460087	-2.251681629	2.733908679
*c1cc(F)c(*)cc1F	*c1ccc(C(=O)O)nc1*	0.5	0.5	block	3.102938519	7.136905576	-2.280096562	2.604184075
*c1cc(F)c(*)cc1F	*c1ccc(C(=O)O)nc1*	0.5	0.5	random	3.092123863	7.184256926	-2.290046046	2.647273802
*c1cc(F)c(*)cc1F	*c1ccc(F)c(*)c1	0.5	0.5	alternating	2.279232007	6.846639811	-3.037906554	2.340042228
*c1cc(F)c(*)cc1F	*c1ccc(F)c(*)c1	0.5	0.5	block	2.408046823	6.840654215	-2.919396923	2.334595336
*c1cc(F)c(*)cc1F	*c1ccc(F)c(*)c1	0.5	0.5	random	2.331896628	6.843016903	-2.989455102	2.336745382
*c1cc(F)c(*)cc1F	*c1ccc(OCC2CCCCO2)c(*)c1	0.5	0.5	alternating	1.992489806	6.252596432	-3.301709378	1.799462753
*c1cc(F)c(*)cc1F	*c1ccc(OCC2CCCCO2)c(*)c1	0.5	0.5	block	2.360577739	6.127884718	-2.96306848	1.685975093
*c1cc(F)c(*)cc1F	*c1ccc(OCC2CCCCO2)c(*)c1	0.5	0.5	random	2.158464708	6.189563091	-3.149012469	1.742102413
*c1cc(F)c(*)cc1F	*c1cnc(OC)c2c(*)[nH]nc12	0.5	0.5	alternating	2.87454713	5.968440937	-2.490216641	1.540881253
*c1cc(F)c(*)cc1F	*c1cnc(OC)c2c(*)[nH]nc12	0.5	0.5	block	2.859408423	5.754547178	-2.504144251	1.346237932
*c1cc(F)c(*)cc1F	*c1cnc(OC)c2c(*)[nH]nc12	0.5	0.5	random	2.852628877	5.846377405	-2.510381434	1.429803439
*c1cc(F)c(*)cc1F	*c1cc(*)c(N)c(CNC2CCC(O)CC2)c1	0.5	0.5	alternating	1.609995783	5.487413531	-3.65360388	1.103146313
*c1cc(F)c(*)cc1F	*c1cc(*)c(N)c(CNC2CCC(O)CC2)c1	0.5	0.5	block	2.204379816	5.227087148	-3.106770569	0.866249304
*c1cc(F)c(*)cc1F	*c1cc(*)c(N)c(CNC2CCC(O)CC2)c1	0.5	0.5	random	1.831945616	5.388812398	-3.449410033	1.013419283
*c1cc(F)c(*)cc1F	*c1nc(C(=O)O)c(*)s1	0.5	0.5	alternating	3.612425766	6.853993274	-1.811368295	2.346733879
*c1cc(F)c(*)cc1F	*c1nc(C(=O)O)c(*)s1	0.5	0.5	block	3.771791854	6.925564292	-1.664751494	2.411863506
*c1cc(F)c(*)cc1F	*c1nc(C(=O)O)c(*)s1	0.5	0.5	random	3.650199648	6.885346372	-1.776616324	2.375265198
*c1cc(F)c(*)cc1F	*c1cc(*)c2ncnn2c1	0.5	0.5	alternating	2.689816945	6.57588158	-2.66016841	2.093652238
*c1cc(F)c(*)cc1F	*c1cc(*)c2ncnn2c1	0.5	0.5	block	2.690994941	6.54612027	-2.659084655	2.066569445
*c1cc(F)c(*)cc1F	*c1cc(*)c2ncnn2c1	0.5	0.5	random	2.694621268	6.550657821	-2.655748433	2.070698617
*c1cc(F)c(*)cc1F	*c1cncc(*)c1C(=O)O	0.5	0.5	alternating	2.982799695	7.083972722	-2.390624281	2.556015177
*c1cc(F)c(*)cc1F	*c1cncc(*)c1C(=O)O	0.5	0.5	block	3.053408162	7.121619572	-2.325664491	2.59027381
*c1cc(F)c(*)cc1F	*c1cncc(*)c1C(=O)O	0.5	0.5	random	3.009880516	7.124948505	-2.365709925	2.59330314
*c1cc(F)c(*)cc1F	*c1c2c(=O)oc(=O)c2c(*)c2c(=O)oc(=O)c12	0.5	0.5	alternating	5.266355465	8.20361779	-0.289752972	3.574892189
*c1cc(F)c(*)cc1F	*c1c2c(=O)oc(=O)c2c(*)c2c(=O)oc(=O)c12	0.5	0.5	block	5.89484717	7.52472707	0.288459396	2.957101633
*c1cc(F)c(*)cc1F	*c1c2c(=O)oc(=O)c2c(*)c2c(=O)oc(=O)c12	0.5	0.5	random	5.524228405	7.963596568	-0.052509867	3.356472877
*c1cc(F)c(*)cc1F	*c1cc(*)c(F)c(F)c1	0.5	0.5	alternating	2.504176559	7.060691885	-2.830957566	2.534829615
*c1cc(F)c(*)cc1F	*c1cc(*)c(F)c(F)c1	0.5	0.5	block	2.549792582	7.04813852	-2.788990825	2.523406053
*c1cc(F)c(*)cc1F	*c1cc(*)c(F)c(F)c1	0.5	0.5	random	2.541879334	7.042011181	-2.796271013	2.517830175
*c1cc(F)c(*)cc1F	*c1cc(*)c2ccncc2n1	0.5	0.5	alternating	3.219313604	6.792678065	-2.173031485	2.290937039
*c1cc(F)c(*)cc1F	*c1cc(*)c2ccncc2n1	0.5	0.5	block	3.242701627	6.727946472	-2.151514503	2.232031289
*c1cc(F)c(*)cc1F	*c1cc(*)c2ccncc2n1	0.5	0.5	random	3.216462818	6.769238654	-2.175654208	2.269607175
*c1cc(F)c(*)cc1F	*c1ccc(C)c(*)n1	0.5	0.5	alternating	2.342445949	6.733249382	-2.979749726	2.236856938
*c1cc(F)c(*)cc1F	*c1ccc(C)c(*)n1	0.5	0.5	block	2.427173054	6.572620563	-2.901800791	2.090684713
*c1cc(F)c(*)cc1F	*c1ccc(C)c(*)n1	0.5	0.5	random	2.394632132	6.640897969	-2.931738439	2.152817152
*c1cc(F)c(*)cc1F	*c1cc(*)c(Cl)c(C)c1	0.5	0.5	alternating	2.335804265	6.829846201	-2.985860076	2.324760043
*c1cc(F)c(*)cc1F	*c1cc(*)c(Cl)c(C)c1	0.5	0.5	block	2.464644116	6.829640089	-2.867327413	2.324572481
*c1cc(F)c(*)cc1F	*c1cc(*)c(Cl)c(C)c1	0.5	0.5	random	2.401666039	6.804544383	-2.925267244	2.301735388
*c1cc(F)c(*)cc1F	*c1ccc(*)s1	0.5	0.5	alternating	3.098310363	5.814221658	-2.284354466	1.400541709
*c1cc(F)c(*)cc1F	*c1ccc(*)s1	0.5	0.5	block	2.890404702	5.497937049	-2.475627675	1.112722715
*c1cc(F)c(*)cc1F	*c1ccc(*)s1	0.5	0.5	random	2.973585989	5.718820041	-2.39910089	1.313726237
*c1cc(F)c(*)cc1F	*c1ccc(-c2ccc(*)cn2)nc1	0.5	0.5	alternating	2.961289099	6.462303038	-2.410414029	1.990295764
*c1cc(F)c(*)cc1F	*c1ccc(-c2ccc(*)cn2)nc1	0.5	0.5	block	2.920241069	6.398523845	-2.448178217	1.932256699
*c1cc(F)c(*)cc1F	*c1ccc(-c2ccc(*)cn2)nc1	0.5	0.5	random	2.923534577	6.4526142	-2.445148189	1.981478922
*c1cc(F)c(*)cc1F	*c1cc(*)c(OCCCC)c(C=CC(=O)O)c1	0.5	0.5	alternating	2.857042697	6.655601475	-2.506320719	2.166197343
*c1cc(F)c(*)cc1F	*c1cc(*)c(OCCCC)c(C=CC(=O)O)c1	0.5	0.5	block	2.881910191	6.630407768	-2.483442624	2.143271069
*c1cc(F)c(*)cc1F	*c1cc(*)c(OCCCC)c(C=CC(=O)O)c1	0.5	0.5	random	2.880650013	6.688681776	-2.484601988	2.196300416
*c1cc(F)c(*)cc1F	*c1ccc2ccc3c(*)ccc4ccc1c2c43	0.5	0.5	alternating	2.822918844	5.817803291	-2.537714664	1.403800995
*c1cc(F)c(*)cc1F	*c1ccc2ccc3c(*)ccc4ccc1c2c43	0.5	0.5	block	2.696503239	5.773223354	-2.65401702	1.363233252
*c1cc(F)c(*)cc1F	*c1ccc2ccc3c(*)ccc4ccc1c2c43	0.5	0.5	random	2.75101138	5.807371247	-2.603869531	1.394307835
*c1cc(F)c(*)cc1F	*c1ccc(-c2ccc(*)s2)s1	0.5	0.5	alternating	3.161168933	5.374936963	-2.226524582	1.000792636
*c1cc(F)c(*)cc1F	*c1ccc(-c2ccc(*)s2)s1	0.5	0.5	block	3.043753458	5.05151125	-2.334546819	0.706475238
*c1cc(F)c(*)cc1F	*c1ccc(-c2ccc(*)s2)s1	0.5	0.5	random	3.125433446	5.268751575	-2.25940123	0.904163933
*c1cc(F)c(*)cc1F	*c1cc(CC(N)C(=O)O)cc(*)c1O	0.5	0.5	alternating	2.215486165	6.401068864	-3.096552728	1.934572666
*c1cc(F)c(*)cc1F	*c1cc(CC(N)C(=O)O)cc(*)c1O	0.5	0.5	block	2.423654267	6.366918507	-2.905038074	1.903495841
*c1cc(F)c(*)cc1F	*c1cc(CC(N)C(=O)O)cc(*)c1O	0.5	0.5	random	2.258183237	6.361361339	-3.057271422	1.898438818
*c1cc(F)c(*)cc1F	*c1cc([N+](=O)[O-])c(*)cn1	0.5	0.5	alternating	3.91198026	7.22037807	-1.535778161	2.680144044
*c1cc(F)c(*)cc1F	*c1cc([N+](=O)[O-])c(*)cn1	0.5	0.5	block	4.032434541	7.18044216	-1.424960222	2.643802366
*c1cc(F)c(*)cc1F	*c1cc([N+](=O)[O-])c(*)cn1	0.5	0.5	random	3.96147232	7.197111652	-1.490245466	2.658971603
*c1cc(F)c(*)cc1F	*c1cc(*)c(=O)n(C)c1	0.5	0.5	alternating	2.402334435	6.08989705	-2.924652319	1.651406315
*c1cc(F)c(*)cc1F	*c1cc(*)c(=O)n(C)c1	0.5	0.5	block	2.471379415	5.940711817	-2.861130939	1.515647754
*c1cc(F)c(*)cc1F	*c1cc(*)c(=O)n(C)c1	0.5	0.5	random	2.429862941	6.026360772	-2.899326095	1.593588303
*c1cc(F)c(*)cc1F	*c1cc(C(=O)O)c(*)o1	0.5	0.5	alternating	3.190835054	6.563881819	-2.19923175	2.082732456
*c1cc(F)c(*)cc1F	*c1cc(C(=O)O)c(*)o1	0.5	0.5	block	3.129404341	6.58797084	-2.255748007	2.104653465
*c1cc(F)c(*)cc1F	*c1cc(C(=O)O)c(*)o1	0.5	0.5	random	3.122989019	6.563295646	-2.261650103	2.082199038
*c1cc(F)c(*)cc1F	*c1ccc(-c2ccccc2)c(*)c1	0.5	0.5	alternating	2.233334215	6.451921935	-3.080132522	1.980848961
*c1cc(F)c(*)cc1F	*c1ccc(-c2ccccc2)c(*)c1	0.5	0.5	block	2.393770827	6.36197177	-2.932530839	1.898994311
*c1cc(F)c(*)cc1F	*c1ccc(-c2ccccc2)c(*)c1	0.5	0.5	random	2.309883879	6.395148898	-3.009706831	1.929185497
*c1cc(F)c(*)cc1F	*c1cncc(*)c1C=O	0.5	0.5	alternating	3.373510292	6.811579047	-2.031170531	2.308136933
*c1cc(F)c(*)cc1F	*c1cncc(*)c1C=O	0.5	0.5	block	3.458958349	6.939581866	-1.952558319	2.424619499
*c1cc(F)c(*)cc1F	*c1cncc(*)c1C=O	0.5	0.5	random	3.46224939	6.882191398	-1.949530561	2.372394172
*c1cc(F)c(*)cc1F	*c1cc(C=O)c(O)c(*)c1C	0.5	0.5	alternating	2.919519067	6.834849811	-2.448842459	2.329313328
*c1cc(F)c(*)cc1F	*c1cc(C=O)c(O)c(*)c1C	0.5	0.5	block	2.941115468	6.851794485	-2.42897377	2.344732982
*c1cc(F)c(*)cc1F	*c1cc(C=O)c(O)c(*)c1C	0.5	0.5	random	2.930873211	6.846432738	-2.438396645	2.339853791
*c1cc(F)c(*)cc1F	*c1nc2cccc(*)n2n1	0.5	0.5	alternating	2.784564765	6.648451421	-2.573000416	2.159690793
*c1cc(F)c(*)cc1F	*c1nc2cccc(*)n2n1	0.5	0.5	block	2.772166238	6.621192071	-2.584407061	2.134884785
*c1cc(F)c(*)cc1F	*c1nc2cccc(*)n2n1	0.5	0.5	random	2.786446643	6.634800498	-2.571269088	2.147268453
*c1cc(F)c(*)cc1F	*c1ccc2oc3ccc(*)cc3c2c1	0.5	0.5	alternating	2.123419174	6.312173782	-3.18125436	1.853678142
*c1cc(F)c(*)cc1F	*c1ccc2oc3ccc(*)cc3c2c1	0.5	0.5	block	2.383957356	6.199991425	-2.941559232	1.751592197
*c1cc(F)c(*)cc1F	*c1ccc2oc3ccc(*)cc3c2c1	0.5	0.5	random	2.237758662	6.259824051	-3.076062031	1.806039887
*c1cc(F)c(*)cc1F	*c1ccc(*)c2ccccc12	0.5	0.5	alternating	2.315344721	6.303181538	-3.004682857	1.8454952
*c1cc(F)c(*)cc1F	*c1ccc(*)c2ccccc12	0.5	0.5	block	2.433033616	6.273118382	-2.896409073	1.818137728
*c1cc(F)c(*)cc1F	*c1ccc(*)c2ccccc12	0.5	0.5	random	2.352450259	6.287313904	-2.970545761	1.831055653
*c1cc(F)c(*)cc1F	*c1cc(*)cc(Oc2ccccc2)c1	0.5	0.5	alternating	2.242700403	6.300045312	-3.07151563	1.842641234
*c1cc(F)c(*)cc1F	*c1cc(*)cc(Oc2ccccc2)c1	0.5	0.5	block	2.372386696	6.297991568	-2.95220424	1.840772327
*c1cc(F)c(*)cc1F	*c1cc(*)cc(Oc2ccccc2)c1	0.5	0.5	random	2.321121958	6.29696484	-2.999367799	1.839838005
*c1cc(F)c(*)cc1F	*c1cc(*)c2[nH]ccc2c1	0.5	0.5	alternating	1.838383221	5.769104397	-3.443487437	1.359485001
*c1cc(F)c(*)cc1F	*c1cc(*)c2[nH]ccc2c1	0.5	0.5	block	2.269525687	5.531876385	-3.046836368	1.14360751
*c1cc(F)c(*)cc1F	*c1cc(*)c2[nH]ccc2c1	0.5	0.5	random	2.007592594	5.685154276	-3.287814814	1.283090391
*c1cc(F)c(*)cc1F	*c1cc(N)cc(*)c1F	0.5	0.5	alternating	1.976439869	5.854656394	-3.31647532	1.437337319
*c1cc(F)c(*)cc1F	*c1cc(N)cc(*)c1F	0.5	0.5	block	2.291912393	5.7801699	-3.026240598	1.369554609
*c1cc(F)c(*)cc1F	*c1cc(N)cc(*)c1F	0.5	0.5	random	2.087706962	5.820147202	-3.214109595	1.405933954
*c1cc(F)c(*)cc1F	*c1cc(*)cc([N+](=O)[O-])c1	0.5	0.5	alternating	3.598465659	7.277391549	-1.824211593	2.73202631
*c1cc(F)c(*)cc1F	*c1cc(*)cc([N+](=O)[O-])c1	0.5	0.5	block	3.609035884	7.20841677	-1.814486987	2.669259261
*c1cc(F)c(*)cc1F	*c1cc(*)cc([N+](=O)[O-])c1	0.5	0.5	random	3.609488945	7.248695952	-1.81407017	2.705913316
*c1cc(F)c(*)cc1F	*c1cccc(*)c1CO	0.5	0.5	alternating	1.838264262	6.968590351	-3.443596879	2.451017219
*c1cc(F)c(*)cc1F	*c1cccc(*)c1CO	0.5	0.5	block	2.257295969	6.963834641	-3.058087708	2.446689524
*c1cc(F)c(*)cc1F	*c1cccc(*)c1CO	0.5	0.5	random	2.094476531	6.967635848	-3.207881591	2.450148622
*c1cc(F)c(*)cc1F	*c1ccc2nc(*)sc2c1	0.5	0.5	alternating	3.245711224	6.419800104	-2.148745674	1.951618095
*c1cc(F)c(*)cc1F	*c1ccc2nc(*)sc2c1	0.5	0.5	block	3.201670959	6.369092064	-2.189262718	1.905473778
*c1cc(F)c(*)cc1F	*c1ccc2nc(*)sc2c1	0.5	0.5	random	3.249680956	6.415759383	-2.145093521	1.947941039
*c1cc(F)c(*)cc1F	*c1ccc(*)n1C(=O)OC(C)(C)C	0.5	0.5	alternating	2.254301638	6.078111651	-3.060842493	1.640681602
*c1cc(F)c(*)cc1F	*c1ccc(*)n1C(=O)OC(C)(C)C	0.5	0.5	block	2.497351413	6.020967343	-2.8372367	1.588680282
*c1cc(F)c(*)cc1F	*c1ccc(*)n1C(=O)OC(C)(C)C	0.5	0.5	random	2.359734484	6.085734464	-2.963844275	1.647618362
*c1cc(F)c(*)cc1F	*c1cnc(*)c([N+](=O)[O-])c1C	0.5	0.5	alternating	3.627109291	7.321223194	-1.797859453	2.771913107
*c1cc(F)c(*)cc1F	*c1cnc(*)c([N+](=O)[O-])c1C	0.5	0.5	block	3.591179634	7.219841192	-1.830914737	2.679655485
*c1cc(F)c(*)cc1F	*c1cnc(*)c([N+](=O)[O-])c1C	0.5	0.5	random	3.598148444	7.279273715	-1.824503431	2.73373908
*c1cc(F)c(*)cc1F	*c1cc(C(=O)OC)c(*)o1	0.5	0.5	alternating	3.160890794	6.51956627	-2.226780469	2.042405305
*c1cc(F)c(*)cc1F	*c1cc(C(=O)OC)c(*)o1	0.5	0.5	block	3.085330775	6.531427548	-2.296295687	2.053199068
*c1cc(F)c(*)cc1F	*c1cc(C(=O)OC)c(*)o1	0.5	0.5	random	3.096833377	6.514786995	-2.285713293	2.038056166
*c1cc(F)c(*)cc1F	*c1cc(*)c(N=C=S)c(OC(F)(F)F)c1	0.5	0.5	alternating	3.101839498	6.705818544	-2.281107662	2.211894875
*c1cc(F)c(*)cc1F	*c1cc(*)c(N=C=S)c(OC(F)(F)F)c1	0.5	0.5	block	3.129416955	6.765241674	-2.255736401	2.265969924
*c1cc(F)c(*)cc1F	*c1cc(*)c(N=C=S)c(OC(F)(F)F)c1	0.5	0.5	random	3.101373862	6.729977333	-2.281536047	2.233879373
*c1cc(F)c(*)cc1F	*c1nc(*)c(C(F)(F)F)[nH]1	0.5	0.5	alternating	2.509184347	6.46673001	-2.826350401	1.994324309
*c1cc(F)c(*)cc1F	*c1nc(*)c(C(F)(F)F)[nH]1	0.5	0.5	block	2.508237678	6.353241076	-2.827221336	1.891049379
*c1cc(F)c(*)cc1F	*c1nc(*)c(C(F)(F)F)[nH]1	0.5	0.5	random	2.497953958	6.437778134	-2.836682359	1.967978102
*c1cc(F)c(*)cc1F	*c1cc(*)c(N)c(C(C)=O)c1	0.5	0.5	alternating	2.463020833	5.820859637	-2.868820833	1.40658227
*c1cc(F)c(*)cc1F	*c1cc(*)c(N)c(C(C)=O)c1	0.5	0.5	block	2.518833056	5.656260937	-2.817473588	1.256797452
*c1cc(F)c(*)cc1F	*c1cc(*)c(N)c(C(C)=O)c1	0.5	0.5	random	2.467162921	5.749235672	-2.865010113	1.341404462
*c1cc(F)c(*)cc1F	*c1ccc(*)c2ncccc12	0.5	0.5	alternating	2.807707189	6.484984441	-2.551709386	2.010935841
*c1cc(F)c(*)cc1F	*c1ccc(*)c2ncccc12	0.5	0.5	block	2.704882972	6.435682237	-2.646307666	1.966070835
*c1cc(F)c(*)cc1F	*c1ccc(*)c2ncccc12	0.5	0.5	random	2.746659497	6.495390306	-2.607873263	2.020405178
*c1cc(F)c(*)cc1F	*c1cc(*)c(N)c(F)c1	0.5	0.5	alternating	1.889696849	5.737545358	-3.396278899	1.330766276
*c1cc(F)c(*)cc1F	*c1cc(*)c(N)c(F)c1	0.5	0.5	block	2.29784411	5.586490801	-3.020783419	1.193306629
*c1cc(F)c(*)cc1F	*c1cc(*)c(N)c(F)c1	0.5	0.5	random	2.076411415	5.668416385	-3.224501498	1.26785891
*c1cc(F)c(*)cc1F	*c1n[nH]c(*)c1[N+](=O)[O-]	0.5	0.5	alternating	3.434336936	7.334406569	-1.975210018	2.783909978
*c1cc(F)c(*)cc1F	*c1n[nH]c(*)c1[N+](=O)[O-]	0.5	0.5	block	3.726418125	7.225827886	-1.706495325	2.685103376
*c1cc(F)c(*)cc1F	*c1n[nH]c(*)c1[N+](=O)[O-]	0.5	0.5	random	3.587532918	7.287082327	-1.834269715	2.740844917
*c1cc(F)c(*)cc1F	*c1cc(*)c(OC)c(C#N)c1	0.5	0.5	alternating	2.430077675	6.591322013	-2.899128539	2.107703032
*c1cc(F)c(*)cc1F	*c1cc(*)c(OC)c(C#N)c1	0.5	0.5	block	2.559087728	6.597519328	-2.78043929	2.113342588
*c1cc(F)c(*)cc1F	*c1cc(*)c(OC)c(C#N)c1	0.5	0.5	random	2.492351302	6.604983799	-2.841836802	2.120135257
*c1cc(F)c(*)cc1F	*c1cc(*)cc(C(=O)O)c1	0.5	0.5	alternating	2.651325708	7.081243686	-2.695580348	2.553531754
*c1cc(F)c(*)cc1F	*c1cc(*)cc(C(=O)O)c1	0.5	0.5	block	2.708504354	7.076890557	-2.642975994	2.549570407
*c1cc(F)c(*)cc1F	*c1cc(*)cc(C(=O)O)c1	0.5	0.5	random	2.677694564	7.082167665	-2.671321001	2.554372576
*c1cc(F)c(*)cc1F	*c1cc(OC)c(*)cc1OC	0.5	0.5	alternating	2.25617	5.969346281	-3.0591236	1.541705116
*c1cc(F)c(*)cc1F	*c1cc(OC)c(*)cc1OC	0.5	0.5	block	2.49451095	5.897557249	-2.839849926	1.476377096
*c1cc(F)c(*)cc1F	*c1cc(OC)c(*)cc1OC	0.5	0.5	random	2.329194629	5.941327601	-2.991940941	1.516208117
*c1cc(F)c(*)cc1F	*c1cnc(*)c2ccccc12	0.5	0.5	alternating	2.836510768	6.524085913	-2.525210093	2.046518181
*c1cc(F)c(*)cc1F	*c1cnc(*)c2ccccc12	0.5	0.5	block	2.755183605	6.49618882	-2.600031083	2.021131826
*c1cc(F)c(*)cc1F	*c1cnc(*)c2ccccc12	0.5	0.5	random	2.791053031	6.51897069	-2.567031211	2.041863328
*c1cc(F)c(*)cc1F	*c1cc(*)c2nccn2n1	0.5	0.5	alternating	3.24711031	6.567467517	-2.147458515	2.085995441
*c1cc(F)c(*)cc1F	*c1cc(*)c2nccn2n1	0.5	0.5	block	3.286084302	6.583995414	-2.111602442	2.101035826
*c1cc(F)c(*)cc1F	*c1cc(*)c2nccn2n1	0.5	0.5	random	3.279826788	6.575611147	-2.117359355	2.093406144
*c1cc(F)c(*)cc1F	*c1cc(C#N)cc(*)c1O	0.5	0.5	alternating	2.393987254	6.817175064	-2.932331726	2.313229308
*c1cc(F)c(*)cc1F	*c1cc(C#N)cc(*)c1O	0.5	0.5	block	2.460383149	6.902698012	-2.871247502	2.391055191
*c1cc(F)c(*)cc1F	*c1cc(C#N)cc(*)c1O	0.5	0.5	random	2.440145586	6.854058409	-2.889866061	2.346793152
*c1cc(F)c(*)cc1F	*c1cc(*)cc(C(C)=O)c1	0.5	0.5	alternating	2.763634523	6.93453624	-2.592256239	2.420027979
*c1cc(F)c(*)cc1F	*c1cc(*)cc(C(C)=O)c1	0.5	0.5	block	2.772834657	6.92220761	-2.583792116	2.408808925
*c1cc(F)c(*)cc1F	*c1cc(*)cc(C(C)=O)c1	0.5	0.5	random	2.765927188	6.930471464	-2.590146987	2.416329032
*c1cc(F)c(*)cc1F	*c1ccc(*)c(C=O)c1F	0.5	0.5	alternating	3.16203463	7.027716602	-2.225728141	2.504822108
*c1cc(F)c(*)cc1F	*c1ccc(*)c(C=O)c1F	0.5	0.5	block	3.130880371	7.021783633	-2.254390059	2.499423106
*c1cc(F)c(*)cc1F	*c1ccc(*)c(C=O)c1F	0.5	0.5	random	3.158945686	7.01685044	-2.228569969	2.494933901
*c1cc(F)c(*)cc1F	*c1ccc(*)c(C(=O)OCC)n1	0.5	0.5	alternating	2.966970439	6.97391316	-2.405187196	2.455860975
*c1cc(F)c(*)cc1F	*c1ccc(*)c(C(=O)OCC)n1	0.5	0.5	block	2.923697691	6.999447334	-2.444998124	2.479097074
*c1cc(F)c(*)cc1F	*c1ccc(*)c(C(=O)OCC)n1	0.5	0.5	random	2.956342037	6.995953681	-2.414965326	2.47591785
*c1cc(F)c(*)cc1F	*c1nc(F)c(*)n1C	0.5	0.5	alternating	2.365764027	6.162523159	-2.958297095	1.717496075
*c1cc(F)c(*)cc1F	*c1nc(F)c(*)n1C	0.5	0.5	block	2.447194176	5.955569533	-2.883381358	1.529168275
*c1cc(F)c(*)cc1F	*c1nc(F)c(*)n1C	0.5	0.5	random	2.420625957	6.088774309	-2.907824119	1.650384621
*c1cc(F)c(*)cc1F	*c1csc2c(*)csc12	0.5	0.5	alternating	2.398469433	5.932705769	-2.928208122	1.508362249
*c1cc(F)c(*)cc1F	*c1csc2c(*)csc12	0.5	0.5	block	2.48315882	5.839419833	-2.850293886	1.423472048
*c1cc(F)c(*)cc1F	*c1csc2c(*)csc12	0.5	0.5	random	2.444526936	5.898579908	-2.885835219	1.477307717
*c1cc(F)c(*)cc1F	*c1cc(O)cc(*)c1N	0.5	0.5	alternating	1.729042266	5.395056634	-3.544081115	1.019101536
*c1cc(F)c(*)cc1F	*c1cc(O)cc(*)c1N	0.5	0.5	block	2.299518488	5.296829069	-3.019242991	0.929714453
*c1cc(F)c(*)cc1F	*c1cc(O)cc(*)c1N	0.5	0.5	random	1.979423313	5.374679776	-3.313730552	1.000558596
*c1cc(F)c(*)cc1F	*c1cc(C=O)c(*)s1	0.5	0.5	alternating	3.426172299	6.451207408	-1.982721485	1.980198742
*c1cc(F)c(*)cc1F	*c1cc(C=O)c(*)s1	0.5	0.5	block	3.500138991	6.358935285	-1.914672128	1.896231109
*c1cc(F)c(*)cc1F	*c1cc(C=O)c(*)s1	0.5	0.5	random	3.437834813	6.399459676	-1.971991972	1.933108306
*c1cc(F)c(*)cc1F	*c1cc(F)cc(*)n1	0.5	0.5	alternating	2.757033031	6.963595354	-2.598329612	2.446471772
*c1cc(F)c(*)cc1F	*c1cc(F)cc(*)n1	0.5	0.5	block	2.683396201	6.965479945	-2.666075495	2.44818675
*c1cc(F)c(*)cc1F	*c1cc(F)cc(*)n1	0.5	0.5	random	2.715124766	6.953998383	-2.636885216	2.437738528
*c1cc(F)c(*)cc1F	*c1nc(*)c(N)nc1C	0.5	0.5	alternating	2.33756069	5.896363978	-2.984244165	1.47529122
*c1cc(F)c(*)cc1F	*c1nc(*)c(N)nc1C	0.5	0.5	block	2.456974216	5.412455743	-2.874383721	1.034934727
*c1cc(F)c(*)cc1F	*c1nc(*)c(N)nc1C	0.5	0.5	random	2.410213247	5.658724112	-2.917403813	1.259038942
*c1cc(F)c(*)cc1F	*c1ccc(C(F)(F)F)c(*)c1	0.5	0.5	alternating	2.459524442	7.198916794	-2.872037513	2.660614282
*c1cc(F)c(*)cc1F	*c1ccc(C(F)(F)F)c(*)c1	0.5	0.5	block	2.571299649	7.13649232	-2.769204323	2.603808011
*c1cc(F)c(*)cc1F	*c1ccc(C(F)(F)F)c(*)c1	0.5	0.5	random	2.492923909	7.166718513	-2.841310004	2.631313846
*c1cc(F)c(*)cc1F	*c1ccc2c(c1)c1cc(*)ccc1n2CC	0.5	0.5	alternating	1.845703408	5.600870114	-3.436752865	1.206391804
*c1cc(F)c(*)cc1F	*c1ccc2c(c1)c1cc(*)ccc1n2CC	0.5	0.5	block	2.292235483	5.337118313	-3.025943355	0.966377665
*c1cc(F)c(*)cc1F	*c1ccc2c(c1)c1cc(*)ccc1n2CC	0.5	0.5	random	1.992575249	5.486722701	-3.301630771	1.102517657
*c1cc(F)c(*)cc1F	*c1cc(*)c([N+]#[C-])c(C)c1	0.5	0.5	alternating	2.563173739	6.830567157	-2.77668016	2.325416113
*c1cc(F)c(*)cc1F	*c1cc(*)c([N+]#[C-])c(C)c1	0.5	0.5	block	2.652571441	6.715001257	-2.694434274	2.220251144
*c1cc(F)c(*)cc1F	*c1cc(*)c([N+]#[C-])c(C)c1	0.5	0.5	random	2.560604482	6.813040808	-2.779043876	2.309467136
*c1cc(F)c(*)cc1F	*c1cc(OC)cc(*)c1Cl	0.5	0.5	alternating	2.085041637	6.60153924	-3.216561694	2.117000709
*c1cc(F)c(*)cc1F	*c1cc(OC)cc(*)c1Cl	0.5	0.5	block	2.451564629	6.666736115	-2.879360541	2.176329865
*c1cc(F)c(*)cc1F	*c1cc(OC)cc(*)c1Cl	0.5	0.5	random	2.264287645	6.623126449	-3.051655367	2.136645069
*c1cc(F)c(*)cc1F	*c1ccc(*)o1	0.5	0.5	alternating	2.833894346	5.902478994	-2.527617202	1.480855884
*c1cc(F)c(*)cc1F	*c1ccc(*)o1	0.5	0.5	block	2.604483255	5.698694412	-2.738675405	1.295411915
*c1cc(F)c(*)cc1F	*c1ccc(*)o1	0.5	0.5	random	2.700365632	5.871677579	-2.650463619	1.452826596
*c1cc(F)c(*)cc1F	*c1cc(F)cc(*)c1C=O	0.5	0.5	alternating	3.145627059	7.117930792	-2.240823105	2.58691702
*c1cc(F)c(*)cc1F	*c1cc(F)cc(*)c1C=O	0.5	0.5	block	3.172983408	7.131536803	-2.215655265	2.599298491
*c1cc(F)c(*)cc1F	*c1cc(F)cc(*)c1C=O	0.5	0.5	random	3.170573432	7.102697311	-2.217872442	2.573054553
*c1cc(F)c(*)cc1F	*c1nc(C(=O)OC)c(*)[nH]1	0.5	0.5	alternating	2.809702491	6.40173117	-2.549873708	1.935175365
*c1cc(F)c(*)cc1F	*c1nc(C(=O)OC)c(*)[nH]1	0.5	0.5	block	2.730185493	6.342069049	-2.623029346	1.880882834
*c1cc(F)c(*)cc1F	*c1nc(C(=O)OC)c(*)[nH]1	0.5	0.5	random	2.76128242	6.387249514	-2.594420174	1.921997058
*c1cc(F)c(*)cc1F	*c1ncc(*)n2ccnc12	0.5	0.5	alternating	3.115200924	6.302447361	-2.26881515	1.844827099
*c1cc(F)c(*)cc1F	*c1ncc(*)n2ccnc12	0.5	0.5	block	3.089720793	6.222744391	-2.29225687	1.772297395
*c1cc(F)c(*)cc1F	*c1ncc(*)n2ccnc12	0.5	0.5	random	3.091803728	6.28261079	-2.29034057	1.826775819
*c1cc(F)c(*)cc1F	*c1cc(CCCCCC)c(*)s1	0.5	0.5	alternating	2.773921989	5.955008588	-2.58279177	1.528657815
*c1cc(F)c(*)cc1F	*c1cc(CCCCCC)c(*)s1	0.5	0.5	block	2.68867175	5.573510718	-2.66122199	1.181494753
*c1cc(F)c(*)cc1F	*c1cc(CCCCCC)c(*)s1	0.5	0.5	random	2.74646982	5.788096731	-2.608047765	1.376768025
*c1cc(F)c(*)cc1F	*c1cc(Cl)nn2c(*)cnc12	0.5	0.5	alternating	3.333388582	6.350460018	-2.068082505	1.888518617
*c1cc(F)c(*)cc1F	*c1cc(Cl)nn2c(*)cnc12	0.5	0.5	block	3.325652059	6.372633626	-2.075200105	1.9086966
*c1cc(F)c(*)cc1F	*c1cc(Cl)nn2c(*)cnc12	0.5	0.5	random	3.436362556	6.421659852	-1.973346449	1.953310465
*c1cc(F)c(*)cc1F	*c1cc(C)c(*)c(C)c1	0.5	0.5	alternating	1.881915094	6.743945077	-3.403438113	2.24659002
*c1cc(F)c(*)cc1F	*c1cc(C)c(*)c(C)c1	0.5	0.5	block	2.311118511	6.671937646	-3.00857097	2.181063258
*c1cc(F)c(*)cc1F	*c1cc(C)c(*)c(C)c1	0.5	0.5	random	2.100619655	6.675644707	-3.202229917	2.184436684
*c1cc(F)c(*)cc1F	*c1cc(*)c(Cl)nc1C	0.5	0.5	alternating	2.395547145	6.987356003	-2.930896627	2.468093962
*c1cc(F)c(*)cc1F	*c1cc(*)c(Cl)nc1C	0.5	0.5	block	2.517422309	6.982403768	-2.818771476	2.463587429
*c1cc(F)c(*)cc1F	*c1cc(*)c(Cl)nc1C	0.5	0.5	random	2.448272614	6.993564525	-2.882389195	2.473743718
*c1cc(F)c(*)cc1F	*c1cc(*)c2nc(Cl)sc2c1	0.5	0.5	alternating	2.897935824	6.633152671	-2.468699042	2.14576893
*c1cc(F)c(*)cc1F	*c1cc(*)c2nc(Cl)sc2c1	0.5	0.5	block	2.862244693	6.59483573	-2.501534882	2.110900514
*c1cc(F)c(*)cc1F	*c1cc(*)c2nc(Cl)sc2c1	0.5	0.5	random	2.882603595	6.613829354	-2.482804692	2.128184712
*c1cc(F)c(*)cc1F	*c1cc(CCCC)c(*)s1	0.5	0.5	alternating	2.777806276	5.958055407	-2.579218226	1.53143042
*c1cc(F)c(*)cc1F	*c1cc(CCCC)c(*)s1	0.5	0.5	block	2.73083472	5.551100581	-2.622432058	1.161101528
*c1cc(F)c(*)cc1F	*c1cc(CCCC)c(*)s1	0.5	0.5	random	2.767600271	5.7953715	-2.588607751	1.383388065
*c1cc(F)c(*)cc1F	*c1cc(F)c(*)c([N+](=O)[O-])c1F	0.5	0.5	alternating	3.720314589	7.480161575	-1.712110578	2.916547034
*c1cc(F)c(*)cc1F	*c1cc(F)c(*)c([N+](=O)[O-])c1F	0.5	0.5	block	3.892298155	7.306790406	-1.553885697	2.75877927
*c1cc(F)c(*)cc1F	*c1cc(F)c(*)c([N+](=O)[O-])c1F	0.5	0.5	random	3.818343958	7.413715131	-1.621923559	2.85608077
*c1cc(F)c(*)cc1F	*c1cc(*)c(F)cc1N	0.5	0.5	alternating	1.784480124	5.743545525	-3.493078286	1.336226428
*c1cc(F)c(*)cc1F	*c1cc(*)c(F)cc1N	0.5	0.5	block	2.279788017	5.54035034	-3.037395024	1.151318809
*c1cc(F)c(*)cc1F	*c1cc(*)c(F)cc1N	0.5	0.5	random	2.011047453	5.670606474	-3.284636343	1.269851891
*c1cc(F)c(*)cc1F	*c1cc(C(C)=O)c(*)s1	0.5	0.5	alternating	3.206165626	6.403185793	-2.185127624	1.936499071
[truncated: 40,967 more rows]
